# Supplementary material for: The Bipolar Illness Onset study: research protocol for the BIO cohort study
Source: PubMed Central journal article supplement — BMJ Open. 2017 Jun 23;7(6):e015462. doi: 10.1136/bmjopen-2016-015462 (PMC5734582; doi:10.1136/bmjopen-2016-015462), 2017-06-23
Supplement: bmjopen-2016-015462.draft_revisions.pdf [file bmjopen-2016-015462.draft_revisions.pdf]

# BMJ Open

## The Bipolar Illness Onset study - research protocol for the BIO cohort study

|                                 |                                                                                                                                                                                                                                                                                                                                                                                                                                                                                                                                                                                                                                                                                                                                                                                                                                                                                                                                                                                                                                                                                                                                                                                                                                                                                                                                                                                                                                                                                                                                                                                                                                                                                                                                                                    |
|---------------------------------|--------------------------------------------------------------------------------------------------------------------------------------------------------------------------------------------------------------------------------------------------------------------------------------------------------------------------------------------------------------------------------------------------------------------------------------------------------------------------------------------------------------------------------------------------------------------------------------------------------------------------------------------------------------------------------------------------------------------------------------------------------------------------------------------------------------------------------------------------------------------------------------------------------------------------------------------------------------------------------------------------------------------------------------------------------------------------------------------------------------------------------------------------------------------------------------------------------------------------------------------------------------------------------------------------------------------------------------------------------------------------------------------------------------------------------------------------------------------------------------------------------------------------------------------------------------------------------------------------------------------------------------------------------------------------------------------------------------------------------------------------------------------|
| Journal:                        | <i>BMJ Open</i>                                                                                                                                                                                                                                                                                                                                                                                                                                                                                                                                                                                                                                                                                                                                                                                                                                                                                                                                                                                                                                                                                                                                                                                                                                                                                                                                                                                                                                                                                                                                                                                                                                                                                                                                                    |
| Manuscript ID                   | bmjopen-2016-015462                                                                                                                                                                                                                                                                                                                                                                                                                                                                                                                                                                                                                                                                                                                                                                                                                                                                                                                                                                                                                                                                                                                                                                                                                                                                                                                                                                                                                                                                                                                                                                                                                                                                                                                                                |
| Article Type:                   | Protocol                                                                                                                                                                                                                                                                                                                                                                                                                                                                                                                                                                                                                                                                                                                                                                                                                                                                                                                                                                                                                                                                                                                                                                                                                                                                                                                                                                                                                                                                                                                                                                                                                                                                                                                                                           |
| Date Submitted by the Author:   | 12-Dec-2016                                                                                                                                                                                                                                                                                                                                                                                                                                                                                                                                                                                                                                                                                                                                                                                                                                                                                                                                                                                                                                                                                                                                                                                                                                                                                                                                                                                                                                                                                                                                                                                                                                                                                                                                                        |
| Complete List of Authors:       | <p>Kessing, Lars; Copenhagen University Hospital, Psychiatric Center Copenhagen<br/> Munkholm, Klaus; Psychiatric Center Copenhagen, Department O, Rigshospitalet<br/> Faurholt-Jepsen, Maria; Psychiatric Center Copenhagen, Department O<br/> Miskowiak, Kamilla ; Psychiatric Center Copenhagen, Department O<br/> Nielsen, Lars; Rigshospitalet, Department of Clinical Biochemistry<br/> Frikke-Schmidt, Ruth; Rigshospitalet, Department of Clinical Biochemistry<br/> Ekstrøm, Claus; University of Copenhagen, Department of Biostatistics<br/> Winther, Ole; Technical University of Denmark, Department of Applied Mathematics and Computer Science<br/> Pedersen, Bente; Copenhagen University Hospital, The Centre of Inflammation and Metabolism at Department of Infectious Diseases<br/> Poulsen, Henrik ; Rigshospitalet, Laboratory of Clinical Pharmacology<br/> McIntyre , RS ; Canada McMaster University, Brain and Cognitive Discovery Foundation, Toronto, Ont.<br/> Kapczinski, Flavio; McMaster University<br/> Gattaz , Wagner; University of São Paulo, Department and Institute of Psychiatry, and Laboratory of Neuroscience (LIM27)<br/> Bardram, Jakob ; Technical University of Denmark, Department of Applied Mathematics and Computer Science<br/> Frost, Mads; IT University of Copenhagen, PIT lab<br/> Mayora, Oscar; Center for Research and Telecommunications Experimentation for Networked Communities<br/> Knudsen, Gitte ; Rigshospitalet, Neurobiology Research Unit and of Center for Integrated Molecular Brain Imaging<br/> Phillips, Mary; University of Pittsburgh, and the Western Psychiatric Institute and Clinic, Department of Psychiatry<br/> Vinberg, Maj; Psychiatric Center Copenhagen, Department O</p> |
| <b>Primary Subject Heading</b>: | Mental health                                                                                                                                                                                                                                                                                                                                                                                                                                                                                                                                                                                                                                                                                                                                                                                                                                                                                                                                                                                                                                                                                                                                                                                                                                                                                                                                                                                                                                                                                                                                                                                                                                                                                                                                                      |
| Secondary Subject Heading:      | Mental health                                                                                                                                                                                                                                                                                                                                                                                                                                                                                                                                                                                                                                                                                                                                                                                                                                                                                                                                                                                                                                                                                                                                                                                                                                                                                                                                                                                                                                                                                                                                                                                                                                                                                                                                                      |
| Keywords:                       | Depression & mood disorders < PSYCHIATRY, bipolar disorder, smartphone, biomarker, MRI scanning, cognition                                                                                                                                                                                                                                                                                                                                                                                                                                                                                                                                                                                                                                                                                                                                                                                                                                                                                                                                                                                                                                                                                                                                                                                                                                                                                                                                                                                                                                                                                                                                                                                                                                                         |
|                                 |                                                                                                                                                                                                                                                                                                                                                                                                                                                                                                                                                                                                                                                                                                                                                                                                                                                                                                                                                                                                                                                                                                                                                                                                                                                                                                                                                                                                                                                                                                                                                                                                                                                                                                                                                                    |

1  
2  
3  
4  
5  
6  
7  
8  
9  
10  
11  
12  
13  
14  
15  
16  
17  
18  
19  
20  
21  
22  
23  
24  
25  
26  
27  
28  
29  
30  
31  
32  
33  
34  
35  
36  
37  
38  
39  
40  
41  
42  
43  
44  
45  
46  
47  
48  
49  
50  
51  
52  
53  
54  
55  
56  
57  
58  
59  
60

SCHOLARONE™  
Manuscripts

For peer review only

# The Bipolar Illness Onset study - research protocol for the BIO cohort study

Lars Vedel Kessing, professor, MD, DMSc<sup>1,2</sup>  
Klaus Munkholm, MD, DMSc<sup>1</sup>  
Maria Faurholt-Jepsen, MD<sup>1</sup>  
Kamilla Woznica Miskowiak, associated professor, MSc, PhD<sup>1,2</sup>  
Lars Bo Nielsen, professor, MD, DMSc<sup>2,3</sup>  
Ruth Frikke-Schmidt, associated professor, MD, PhD, DMSc<sup>2,3</sup>  
Claus Ekstrøm, professor, MSc, PhD<sup>4</sup>  
Ole Winther, professor, MSc, PhD<sup>5,6</sup>  
Bente Klarlund Pedersen, professor, MD, DMSc<sup>7</sup>  
Henrik Enghusen Poulsen, professor, MD, DMSc<sup>8</sup>  
Roger S. McIntyre, professor, MD, FRCPC<sup>9</sup>  
Flavio Kapczinski, professor, MD, PhD, FRCPC<sup>10</sup>  
Wagner F. Gattaz, professor, MD, PhD<sup>11</sup>  
Jakob Bardram, professor, MSc, PhD<sup>5</sup>  
Mads Frost, MSc, PhD<sup>12</sup>  
Oscar Mayora, MSc, PhD<sup>13</sup>  
Gitte Moos Knudsen, professor, MD, DMSc<sup>14</sup>  
Mary Phillips, professor, MD, PhD<sup>15</sup>  
Maj Vinberg, associated professor, MD, PhD, DMSc<sup>1,2</sup>

Psychiatric Center Copenhagen, Department O, Denmark<sup>1</sup>  
University of Copenhagen, Institute of Clinical Medicine, Denmark<sup>2</sup>  
Department of Clinical Biochemistry, Rigshospitalet, Denmark<sup>3</sup>  
Department of Biostatistics, University of Copenhagen, Denmark<sup>4</sup>  
Technical University of Denmark, Department of Applied Mathematics and Computer Science, Denmark<sup>5</sup>  
Gene Regulation Bioinformatics at the Bioinformatics Centre, Dept. of Biology/BRIC, University of Copenhagen, Denmark<sup>6</sup>  
The Centre of Inflammation and Metabolism at Department of Infectious Diseases, Rigshospitalet, Copenhagen, Denmark<sup>7</sup>  
Laboratory of Clinical Pharmacology, Rigshospitalet, Denmark<sup>8</sup>  
Department of Psychiatry and Pharmacology, University of Toronto, Brain and Cognitive Discovery Foundation, Toronto, On., Canada<sup>9</sup>  
McMaster University, Canada<sup>10</sup>  
Department and Institute of Psychiatry, and Laboratory of Neuroscience (LIM27), University of São Paulo Medical School, Brazil<sup>11</sup>  
IT University Copenhagen, Denmark<sup>12</sup>  
Create-Net: Center for Research and Telecommunications Experimentation for Networked Communities, Trento, Italy<sup>13</sup>  
Neurobiology Research Unit and of Center for Integrated Molecular Brain Imaging, Rigshospitalet, Denmark<sup>14</sup>  
Department of Psychiatry, University of Pittsburgh, and the Western Psychiatric Institute and Clinic, Pittsburgh, USA<sup>15</sup>

1  
2  
3  
4  
5 **Correspondence to:**

6 Lars Vedel Kessing, Psychiatric Center Copenhagen, Department O, 6233

7 Blegdamsvej 9, 2100 Copenhagen, Denmark

8 and University of Copenhagen, Faculty of Health and Medical Sciences

9 Tel.: 45 - 38 64 70 81

10 Mail: lars.vedel.kessing@regionh.dk  
11  
12  
13  
14  
15  
16  
17  
18  
19  
20  
21  
22  
23  
24  
25  
26  
27  
28  
29  
30  
31  
32  
33  
34  
35  
36  
37  
38  
39  
40  
41  
42  
43  
44  
45  
46  
47  
48  
49  
50  
51  
52  
53  
54  
55  
56  
57  
58  
59  
60

For peer review only

1  
2  
3  
4 **Introduction:** Bipolar disorder is an often disabling mental illness with a lifetime prevalence of 1-  
5  
6 2%, a high risk of recurrence of manic and depressive episodes, a lifelong elevated risk of suicide  
7  
8 and a substantial heritability. The course of illness is frequently characterised by progressive  
9  
10 shortening of inter-episode intervals with each recurrence and increasing cognitive dysfunction in a  
11  
12 subset of individuals with this condition. Clinically, diagnostic boundaries between bipolar disorder  
13  
14 and other psychiatric disorders such as unipolar depression are unclear although pharmacological  
15  
16 and psychological treatment differs substantially. Patients with bipolar disorder are often  
17  
18 misdiagnosed and the mean delay between onset and diagnosis is 5-10 years. Although the risk of  
19  
20 relapse of depression and mania is high it is for most patients impossible to predict and  
21  
22 consequently prevent upcoming episodes in an individual tailored way. The identification of  
23  
24 objective biomarkers can both inform bipolar disorder diagnosis and provide biological targets for  
25  
26 the development of new and personalized treatments. Accurate diagnosis of bipolar disorder in its  
27  
28 early stages could help to prevent the long-term detrimental effects of the illness.  
29  
30

31  
32 The present Bipolar Onset study (BIO) study aims to identify 1) a composite blood-based biomarker  
33  
34 2) a composite electronic smartphone-based biomarker and 3) a neurocognitive and neuroimaging  
35  
36 based signature for bipolar disorder.  
37  
38

39 **Methods and analysis:** The study will include 300 patients with newly diagnosed/first episode  
40  
41 bipolar disorder, 200 of their healthy siblings or offspring, and 100 healthy individuals without a  
42  
43 family history of affective disorder. All participants will be followed longitudinally with repeated  
44  
45 blood samples and other biological tissues, self-monitored and automatically generated smartphone  
46  
47 data, neuropsychological tests and a subset of the cohort with neuroimaging during a 5-10 year  
48  
49 study period.  
50  
51

52 **Ethics and dissemination:** The study has been approved by the Local Ethical Committee (H-7-  
53  
54 2014-007) and the data agency, Capital Region of Copenhagen (RHP-2015-023).  
55  
56  
57  
58  
59  
60

1  
2  
3  
4  
5  
6  
7  
8  
9  
10  
11  
12  
13  
14  
15  
16  
17  
18  
19  
20  
21  
22  
23  
24  
25  
26  
27  
28  
29  
30  
31  
32  
33  
34  
35  
36  
37  
38  
39  
40  
41  
42  
43  
44  
45  
46  
47  
48  
49  
50  
51  
52  
53  
54  
55  
56  
57  
58  
59  
60

**Trial Registration Number:** NCT02888262.

For peer review only

## Introduction

### Biomarkers in bipolar disorders

Bipolar disorder is a disabling mental illness with a lifetime prevalence of 1-2%, a high risk of recurrence of manic and depressive episodes, a lifelong elevated risk of suicide and a substantial heritability of 60-80% (1). Bipolar disorder is often conceptualised as a progressive disorder with increasing risk of recurrence for every new affective episode (2-5) and with increasing cognitive disabilities during the course of illness (6-9). Clinically, diagnostic boundaries between bipolar disorder and other psychiatric disorders such as unipolar disorder are unclear although some pharmacological and psychological treatment strategies differ substantially. Patients with bipolar disorder are often misdiagnosed as having from unipolar disorder, transient psychosis, reaction to stress/adjustment disorder or psychoactive substance abuse (10) and the mean delay between onset and diagnosis is 5-10 years (11). Although the risk of relapse of depression and mania is high it is for most patients impossible to predict and consequently prevent upcoming episodes in an individual tailored way. The identification of objective biomarkers as measures of pathophysiologic processes can both inform bipolar disorder diagnosis and provide biological targets for the development of new and personalized treatments (12). Accurate diagnosis of bipolar disorder in its early stages could help to prevent the long-term detrimental effects of the illness.

Recently, promising results have been presented regarding a diagnostic test for unipolar depression comprising levels of nine biomarkers in peripheral blood (13). Although the nature of bipolar disorder seems more biological driven than the nature of major depression with a higher heritability there has been no or few attempts to identify a similar composite biomarker for bipolar disorder.

### *Onset of illness and staging in bipolar disorder*

1  
2  
3  
4 Although the course of illness is heterogeneous there is a body of evidence for clinical progression  
5  
6 on average of unipolar and bipolar disorders as increasing number of affective episodes seem  
7  
8 associated with 1) increasing risk of recurrence 2) increasing duration of episodes 3) increasing  
9  
10 symptomatic severity of episodes 4) decreasing threshold for developing episodes 5) increasing risk  
11  
12 of developing dementia (9). It is likely that this clinical progression with deteriorating effects of  
13  
14 affective episodes and duration of illness is associated with neurobiological changes over the course  
15  
16 of illness. Unfortunately, results of all longitudinal studies on the biology of bipolar disorder are  
17  
18 hitherto hampered by three major limitations: 1) Only few studies have recruited patients with  
19  
20 bipolar illness from onset of the illness and most of these have used first onset mania as inclusion  
21  
22 criteria thereby excluding patients with a hypomanic episode (bipolar disorder, type II). As the  
23  
24 biology of bipolar disorder - based on cross-sectional studies - seem to change over the course of  
25  
26 illness from first episode to first relapse and recurrent relapses to an unremitting or rapid cycling  
27  
28 course (14-18), this is a major limitation in our knowledge internationally, 2) the number of patients  
29  
30 included in prior studies are less than 200, which is a limitation taking the heterogeneity of bipolar  
31  
32 disorder into account (e.g. bipolar disorder type I and II may have different biology, etc.), and 3) the  
33  
34 prospective follow-up period is less than a few years in all studies.  
35  
36  
37  
38

39  
40 In the BIO study we will establish a large cohort comprising of three sub cohorts that will be  
41  
42 followed long-term with systematic diagnostic, blood-based biomarkers, smartphone data, cognitive  
43  
44 and brain imaging assessment. The three sub cohort will consist of: 1) patients with newly  
45  
46 diagnosed/first episode bipolar disorder and 2) their healthy first-generation siblings and offspring  
47  
48 3) healthy individuals without a family history of affective disorder.  
49  
50

51  
52  
53 Overall aims:  
54  
55  
56  
57  
58  
59  
60



- 1  
2  
3  
4 1. To identify a composite blood-based biomarker measure as well as a composite electronic  
5  
6 smartphone-based biomarker from onset of bipolar disorder, during progression and in later  
7  
8 stages  
9
- 10  
11 2. To investigate if the composite blood-based biomarker measure and electronic smartphone-  
12  
13 based biomarker identified among patients with bipolar disorder predicts onset of illness  
14  
15 (depression or mania) among these patients healthy first-generation siblings and offspring  
16  
17
- 18 3. By applying an integrated systems approach, to identify patterns of “cerebral signatures”  
19  
20 across neuro circuitry and cognitive levels and to validate the composite blood-based  
21  
22 biomarker and electronic smartphone-based biomarkers against these bio-signatures  
23
- 24 4. To investigate long-term developmental trajectories in neurocognitive function and brain  
25  
26 imaging from the high risk state to onset of bipolar disorder following first relapse and  
27  
28 recurrent relapses and in the late stage with an unremitting, multi-episode or rapid cycling  
29  
30 course.  
31  
32  
33  
34

## 35 Methods and analysis

### 36 Overall methods

37  
38 The BIO study is a long-term cohort study started April 2015 and planned to include 300 newly  
39  
40 diagnosed/first episode bipolar patients from the Copenhagen Affective Disorder Clinic, 200 of  
41  
42 these patients’ healthy first-generation relatives and 100 healthy individuals *without* a first-  
43  
44 generation family history of affective disorders.  
45  
46  
47  
48

### 49 The Copenhagen Affective Disorder Clinic

50  
51 The Copenhagen Affective Disorder Clinic is a mood disorder clinic that provides treatment service  
52  
53 for patients with newly diagnosed/first episode bipolar disorder (19). The Copenhagen Affective  
54  
55  
56  
57  
58  
59  
60

1  
2  
3  
4 Disorder Clinic receives patients from the entire Capital Region of Denmark covering a catchment  
5 area of 1.6 million people and all psychiatric centres in the region. All patients referred to the Clinic  
6 as newly diagnosed/first episode patients, i.e., onset of first manic or hypomanic episode or when  
7 the diagnosis of bipolar disorder is made for the first time, will routinely be asked for inclusion in  
8 the BIO study.  
9  
10  
11  
12  
13

14  
15  
16  
17 Recruitment of the three cohorts:  
18

- 19  
20 1. 300 patients referred to the Copenhagen Affective Disorder Clinic as newly diagnosed/first  
21 episode bipolar patients, i.e., onset of first manic or hypomanic episode or when the  
22 diagnosis of bipolar disorder is made for the first time. The Clinic receives more than 100  
23 newly diagnosed/first episode bipolar patients each year and we expect that nearly all will  
24 accept participation in the BIO study as this implies an extensive clinical evaluation.  
25  
26
- 27 2. 200 first-generation relatives (siblings and children aged 15 to 40 years) to the recruited  
28 newly diagnosed/first episode bipolar patients.  
29  
30
- 31 3. 100 age- and gender-matched healthy individuals *without* a first-generation family history of  
32 affective disorders recruited among blood donors from the Blood Bank at Rigshospitalet,  
33 Copenhagen, as in prior studies.  
34  
35  
36  
37  
38  
39  
40  
41  
42  
43

44 Diagnostic assessments at inclusion  
45

46 The initial diagnostic assessment will be done using the Structured Clinical Interview for DSM-IV-  
47 TR Axis I Disorders (SCID (20)) categorizing patients in bipolar disorder type I or type II as part of  
48 daily praxis by the experienced specialists in psychiatry during the patients two year stay in the  
49 Copenhagen Affective Disorder Clinic. This clinical diagnosis of bipolar disorder will be confirmed  
50  
51  
52  
53  
54  
55  
56  
57  
58  
59  
60

1  
2  
3  
4 in a semi-structured research based interview using the Schedules for Clinical Assessment in  
5  
6 Neuropsychiatry (SCAN) (21).  
7  
8  
9

### 10 11 12 13 Follow-up

14  
15 Besides the assessments at inclusion, patients will be assessed during remitted, depressive and  
16  
17 manic phases. Healthy control individuals will be assessed initially and every year during the first  
18  
19 four years and after this, every second year for five years.  
20

21  
22 As part of daily clinical praxis in Copenhagen Affective Disorder Clinic and as part of the BIO  
23  
24 study all patients will get access to a smartphone app for electronic continuous monitoring of illness  
25  
26 activity during a 5-year follow-up period (see sub-study BIO-2). Additionally, research assistants  
27  
28 will contact all participants regularly to identify upcoming episodes / onset of illness and to ensure  
29  
30 continued participation in the BIO study.  
31

32  
33 It is estimated that patients will develop four to five affective episodes on average during the  
34  
35 follow-up period. It estimated that 20-30% of the healthy first-generation relatives will develop  
36  
37 onset of affective illness compared to 2% among the healthy individuals *without* a first-generation  
38  
39 family history of affective disorders. Finally, linkage to Danish nation-wide register based data will  
40  
41 be included for all individuals on psychiatric hospitalisations, prescribed medication and  
42  
43 socioeconomic variables during the five years follow-up.  
44  
45  
46  
47

### 48 49 Investigations

50  
51 We will include state of the art methods within clinical assessment as well as biomarkers including  
52  
53 a range of new methods:  
54  
55  
56  
57  
58  
59  
60

- 1  
2  
3  
4 1. Clinical assessments using the Hamilton Depression Scale-17 items (HAMD-17) (22), the  
5  
6 Young Mania Rating Scale (YMRS) (23), the functional assessment short test (FAST) (a  
7  
8 measure of psychosocial function) (24)  
9
- 10 2. Questionnaires including the Hypomania Check list (25), Standardized Assessment of  
11  
12 Personality - Abbreviated Scale (SAPAS) (26), the WHO (Five) well-being index (27) and  
13  
14 the Verona Satisfaction Scale-Affective Disorder (VSS-A) (28).  
15
- 16 3. Standardised fasting blood tests for a large number of potential biomarkers (see later  
17  
18 section: BIO-1, Biological tests).  
19
- 20 4. Spot urine samples for oxidative generated damage to DNA and RNA  
21
- 22 5. Hair cortisol as a valid and reliable index of long-term systemic cortisol levels (29)  
23
- 24 6. Digital retinal imaging of the retinal venular caliber is a new, noninvasive method to  
25  
26 visualize microcirculation in the eye, and seems to reflect vascular conditions in the brain as  
27  
28 well as early decrease in neuropsychological functioning (30).  
29
- 30 7. Daily electronic smartphone based self-monitoring of depressive and manic symptoms  
31  
32
- 33 8. Daily electronic smartphone-based automatically generated data (e.g. data on phone usage,  
34  
35 social activity and physical activity)  
36  
37
- 38 9. Neuropsychological assessment (only during full or partial remission)  
39
- 40 10. Structural magnetic resonance imaging (MRI) focusing on prefrontal cortex and  
41  
42 hippocampus as well as functional MRI (fMRI) (only during full or partial remission).  
43  
44  
45  
46  
47

48 The BIO study includes four separate but interacting sub-studies (BIO-1, BIO-2, BIO-3, BIO-4), as  
49  
50 illustrated in Table 1 with specified aims, background and theoretical basis, and methods, as  
51  
52 described in the following.  
53  
54  
55  
56  
57  
58  
59  
60

## **BIO-1: peripheral blood-based biomarker in bipolar disorder**

### Aims

To identify a composite blood-based biomarker that 1) discriminates bipolar disorder from healthy control individuals 2) discriminates between manic, depressive and remitted states 3) predicts emerging affective episodes, and 4) to validate the composite blood-based biomarker against the Smartphone-based biomarker, and the neurocognitive and brain imaging signature, and 5) to investigate the change in individual biomarkers as well as the composite blood-based biomarker following onset of first manic episode, during successive relapses and in the end late stages of the illness (15).

### Background and theoretical basis

In a series of meta-analyses we concluded that although a number of candidate peripheral biomarkers related to neuroplasticity, inflammation, oxidative stress and gene expression seem promising, findings are limited by poor study designs, small cross sectional samples, lack of adjustment for important confounders related to most peripheral biomarkers and poor laboratory methodology (31-34). Because of high inter-individual variation in peripheral biomarkers, assessment of intra-individual alterations from onset of illness through different affective phases and into the late illness stage is necessary to identify clinically relevant and valid biomarkers, necessitating a longitudinal study design (32;35).

We have in two longitudinal studies with repeated assessments of patients with bipolar disorder during affective states (manic/mixed, depressive and euthymic) and healthy control individuals found that brain derived neurotrophic factor (BDNF) (36), increased oxidative DNA and RNA

1  
2  
3  
4 damage (37;38) and decreased mRNA expression of the PTGDS gene encoding the prostaglandin D  
5  
6 synthase enzyme (39) are markers related to the illness trait in bipolar disorder. The level of the  
7  
8 cytokines IL-6 and IL-18 was related to manic episodes only and the activity of GSK-3beta varied  
9  
10 with affective states (40) suggesting that these may be state markers (41). These results have  
11  
12 contributed to the research area of biomarkers in bipolar disorder, moving the area closer towards  
13  
14 identifying clinically applicable biomarkers.

15  
16  
17 Nevertheless, it is unlikely, that one single biomarker will provide a useful diagnostic tool; instead a  
18  
19 composite of several relevant biomarkers appears a more viable approach (42). Recently promising  
20  
21 results have been presented regarding a diagnostic test in unipolar depression comprising serum  
22  
23 levels of nine individual biomarkers in peripheral blood (13). Similarly, preliminary studies have  
24  
25 suggested composite biomarkers for bipolar disorder (43-45). We identified a composite biomarker  
26  
27 consisting of gene expression from 19 candidate genes for bipolar disorder that accurately  
28  
29 discriminated bipolar patients from healthy control individuals (43). Thus, such approaches highly  
30  
31 increase the chances of obtaining a high specificity and sensitivity of the composite blood-based  
32  
33 biomarker (43-45).  
34  
35

36  
37 In order to establish relevant markers of risk and markers related to illness stage, it is necessary to  
38  
39 include assessment before onset of illness and during first- and recurrent relapses and in the late  
40  
41 stages of the illness according to the staging model of bipolar disorder (46). Further, the study of  
42  
43 early onset individuals is necessary to evaluate biomarker levels without influence from medication,  
44  
45 which may otherwise limit the validity of identified biomarkers.  
46  
47  
48

## 49 50 Methods

51  
52 BIO-1 will include repeated clinical assessments and corresponding samples of blood and other  
53  
54 tissues among the 300 newly diagnosed/first episode bipolar patients, the 200 first-generation  
55  
56  
57  
58  
59  
60

1  
2  
3  
4 relatives and the 100 healthy individuals *without* a first-generation family history of affective  
5  
6 disorder.

7  
8 We will estimate a composite blood-based biomarker based on a number of individual markers  
9  
10 including brain-derived neurotrophic factor (BDNF), neutrophin-3 (NT-3), 5 different cytokines,  
11  
12 gene expression, additional thirty candidate genes and other potential biomarkers (see Biological  
13  
14 tests), and identify the composite biomarker that correlates best with affective states and Hamilton  
15  
16 Depression Rating Scale and Young Mania Rating Scale scores of depression and mania,  
17  
18 respectively. A final blood-based biomarker will be chosen based on its ability to 1) discriminate  
19  
20 patients with bipolar disorder from healthy control individuals and to 2) discriminate between  
21  
22 manic, depressive and remitted states in bipolar disorder.  
23  
24  
25  
26  
27

#### 28 Laboratory procedures

29  
30 We will obtain careful standardization of blood sampling and laboratory analysis by obtaining  
31  
32 blood samples in a fasting state and in a one hour interval in the morning. At the same day as blood  
33  
34 sampling, smoking status, alcohol use, BMI and menstrual cycle, etc., will be assessed. Blood  
35  
36 sampling and all phases of laboratory processing for plasma and DNA/RNA analyses will be done  
37  
38 at the Department of Clinical Biochemistry, Rigshospitalet using standard operational methods  
39  
40 conducted by a team of technicians blinded with respect to participant status. All plasma samples  
41  
42 will be stored at – 80 C. The BIO study will include a total of 2400 blood samples: 300 patients x 5  
43  
44 + 200 healthy first-generation relatives x 3 + 100 healthy participants without a first-generation  
45  
46 family history x 3.  
47  
48  
49  
50  
51  
52

#### 53 Biological tests

54  
55  
56  
57  
58  
59  
60

1  
2  
3  
4 We will use a multianalyte panel including a large number of potential biomarkers such as plasma  
5  
6 levels of Neutrophins3, GSK-3,  $\beta$ -amyloid A $\beta$ 40 and A $\beta$ 42, inflammatory markers, high sensitive  
7  
8 C-reactive protein, lipoproteins (VLDL, LDL, HDL) and specific apolipoproteins (e.g. apoE,  
9  
10 ApoA-I, apoA-II, and apoM) as potential markers of low-grade inflammation particularly salient in  
11  
12 the early stages of bipolar disorder. Total RNA, microRNA, genomic DNA and histones are  
13  
14 isolated from peripheral blood mononuclear cells. Gene expression and alternative slicing of RNA  
15  
16 transcripts are analysed using array reverse transcription quantitative real-time PCR (RT-qPCR) and  
17  
18 next generation sequencing. Epigenetic modifications of the DNA (e.g. methylation) are measured  
19  
20 using antibody based methods or bisulphite treatments in combination with next generation  
21  
22 sequencing. The genomic positions of histones with specific modifications are detected using  
23  
24 immune precipitation and sequencing (CHIP-Seq). The degree of histone modifications is measured  
25  
26 by semi-quantitative antibody based detection.  
27  
28

29  
30 Measurements of DNA and RNA damage by oxidation are obtained from spot urine samples and  
31  
32 analyzed using ultra performance liquid chromatographic (UPLC) and mass spectrometry.  
33  
34

35 Hair cortisol will be included as a valid and reliable index of long-term systemic cortisol levels  
36  
37 (29).  
38  
39

#### 40 41 Statistical analyses

42  
43 Data represent repeated measures within and between individuals and will be analysed using a  
44  
45 combination of generalized linear mixed models, integrated data analysis, and penalized regression  
46  
47 approaches to facilitate the combined feature selection and prediction of the available high-  
48  
49 dimensional data. Integrative data analysis ensures that we are able to identify an improved  
50  
51 composite blood-based biomarker since data from different molecular levels are combined in a  
52  
53 simultaneous analysis that closer resembles the biological system (47;48). Further, we will use cross  
54  
55  
56  
57  
58  
59  
60



1  
2  
3  
4 validation or alternatively split sample designs in the development and validation of the composite  
5  
6 biomarker.  
7  
8  
9

#### 10 Statistical power

11  
12 The study has a power of 80% to detect a minimum increment of 6.5 percentage points in sensitivity  
13 if we assume that the existing diagnostic tools have a sensitivity of 70% to diagnose bipolar  
14 disorder for a patient that has the disorder (see (49)). Thus, if the composite biomarker score  
15 increases the sensitivity by a minimum of 6.5 percentage points then we have a power of 80% to  
16 detect that increase based on 300 patients with bipolar disorder using a one-sided exact binomial  
17 test (for fixed specificity).  
18  
19  
20  
21  
22  
23  
24  
25  
26  
27

### 28 **BIO-2: Smartphone-based electronic biomarker in bipolar disorder**

#### 29 Aims

30  
31 To identify a composite smartphone-based electronic biomarker that 1) discriminates patients with  
32 bipolar disorder from healthy control individuals 2) discriminates between manic, depressive and  
33 remitted states 3) predicts emerging affective episodes, and 4) to investigate the change in the  
34 composite smartphone-based biomarker following onset of first manic episode, during successive  
35 relapses and in the end stages of the illness as according to the staging system by Berk et al (15).  
36  
37  
38  
39  
40  
41  
42  
43  
44  
45

#### 46 Background and theoretical basis

47  
48 Recently, electronic self-monitoring of the severity of depressive and manic symptoms using text  
49 messages has been suggested as an easy and inexpensive way to identify early signs of affective  
50 episodes, providing opportunities for mental health care providers to intervene shortly after  
51 prodromal symptoms first appear (50). We have, in the MONARCA project developed and tested a  
52  
53  
54  
55  
56  
57  
58  
59  
60

1  
2  
3  
4 smartphone-based electronic monitoring system including daily subjective self-assessments of  
5  
6 illness activity in bipolar disorder as well as a bi-directional feedback loop between the patient and  
7  
8 clinicians (the MONARCA system (51-55)). Using the MONARCA system, fine-grained electronic  
9  
10 data were collected during everyday life in naturalistic settings in patients with bipolar disorder.  
11  
12 The MONARCA system was reported highly usable and useful by patients with bipolar disorder  
13  
14 with a high self-assessment adherence (87-95%), and the patients reported that the MONARCA  
15  
16 system helped them to better manage their disease (51;52). Further, the severity of depressive and  
17  
18 manic symptoms was found to correlate with automatically generated smartphone data including 1)  
19  
20 physical activity as reflected by the number of changes in cell tower ID per day (56), 2) social  
21  
22 activity as reflected by the number of incoming and outgoing calls per day, the duration of  
23  
24 incoming and outgoing calls per day, and the number of outgoing text messages per day (57), and 3)  
25  
26 voice features collected during phone calls (58). Although these findings are encouraging there is a  
27  
28 need to integrate self-monitored smartphone data with automatically generated smartphone data on  
29  
30 social and physical activity, speech and sleep into one composite smartphone generated electronic  
31  
32 biomarker measure. This composite measure should be modeled to 1) discriminate patients with  
33  
34 bipolar disorder from healthy control individuals 2) have a high correlation with depressive and  
35  
36 manic symptoms 3) discriminate between euthymic, manic and depressive states 4) early predict  
37  
38 emerging affective episodes for the individual patient to increase the possibility for early  
39  
40 intervention.  
41  
42  
43  
44  
45  
46  
47

#### 48 Methods:

49  
50 All newly diagnosed/first episode patients will have access to a smartphone based system  
51  
52 (Monsenso that is a developed from the MONARCA system) for continuous self-monitoring as well  
53  
54 as fine-grained automatically monitoring of behavioural activity and early identification of  
55  
56  
57  
58  
59  
60

1  
2  
3  
4 emerging affective episodes during the first two years and following relapse of episodes during a 5-  
5  
6 year follow-up period.  
7

8  
9 Data analyses: In contrast to data in BIO-1, data in BIO-2 represent big data collected on a *daily* basis  
10 within individuals. We will use hierarchical Bayesian predictive models that can handle big data through  
11 sampling and visualization techniques that summarize data.  
12  
13

### 14 15 16 17 **BIO-3: neurocognitive and brain imaging signatures in bipolar disorder**

#### 18 19 Aims

20  
21 1) To identify an integrated brain-based biomarker of bipolar disorder including neurocognitive and  
22 neuroimaging measures tapping into ‘hot’ (i.e. emotion-laden) and ‘cold’ (non-emotional)  
23 cognition, 2) to examine whether the degree of abnormality in these measures predicts illness  
24 onset in the high-risk group and/or relapse in the patient group, 3) to identify developmental  
25 trajectories in ‘hot’ and ‘cold’ cognitive dysfunction and to identify structural and functional MRI  
26 correlates in bipolar disorder via longitudinal assessments of high-risk individuals to remission after  
27 onset of first manic episode and following successive relapses, and 4) to identify associations  
28 between aberrant ‘hot’ and ‘cold’ neurocognitive function, structural and functional brain changes  
29 and the composite blood-based and Smartphone-based biomarkers. Such ‘integrated systems  
30 approach’ involving identification of patterns of biomarkers (bio-signatures) across these multiple  
31 levels of investigation is considered imperative for deeper understanding of the dimensions of  
32 underlying pathophysiological processes in bipolar disorder (12).  
33  
34  
35  
36  
37  
38  
39  
40  
41  
42  
43  
44  
45  
46  
47  
48  
49

#### 50 51 Background and theoretical basis

52  
53 Results from a number of meta-analyses of a large number of cross sectional studies of patients with  
54 bipolar disorder in remission suggest trait-related ‘cold’ cognitive deficits in attention/processing  
55  
56  
57  
58  
59  
60

1  
2  
3  
4 speed, memory, and executive function compared to healthy controls (59-62) that correlate with  
5  
6 everyday functioning (63). Cross-sectional comparison of patients at different illness stages  
7  
8 revealed more pronounced cognitive deficits during late compared with early stages in line with the  
9  
10 staging hypothesis of bipolar disorder (64). However, there are only a few longitudinal studies of  
11  
12 neuropsychological functioning with small sample sizes (12 studies including a total of 152 bipolar  
13  
14 patients (65)). A meta-analysis of these studies found no support for a progressive nature of  
15  
16 cognitive deficits (65). However, results from these studies are hampered by a number of limitations  
17  
18 including small sample sizes, short follow-up (mean follow-up period of 4.6 years) and high  
19  
20 attrition rates (up to 45%) (65). Consequently, it is unclear whether cognitive function assessed with  
21  
22 neuropsychological tests deteriorate with the number and duration of illness episodes in bipolar  
23  
24 disorder although epidemiological studies consistently revealed increased risk of developing  
25  
26 dementia long-term (6;8;66-68) and there are some evidence for increasing risk of dementia with  
27  
28 the number of episodes (7) (see also (9)).

29  
30  
31  
32  
33 Deficits in 'hot' cognition are closely linked to emotional disturbances (69) and difficulties in socio-  
34  
35 emotional behaviour and interpersonal relations in bipolar disorder (70). 'Hot' cognition  
36  
37 abnormalities in bipolar disorder have been observed within three domains; (i) emotional  
38  
39 processing, (ii) reward processing and (iii) emotion regulation (reviews in (71;72)).

40  
41  
42 Results from a large number of cross sectional structural imaging studies suggest that patients also  
43  
44 show increased lateral ventricular volumes and greater prevalence of white matter hyper-intensities  
45  
46 (73). While these findings are rather unspecific, studies also suggest that treatment with lithium  
47  
48 increases the grey matter volume of prefrontal cortex, amygdala and hippocampus (73). In addition,  
49  
50 a number of functional imaging studies suggest that bipolar disorder is associated with  
51  
52 abnormalities within fronto-limbic-subcortical structures (35).  
53  
54  
55  
56  
57  
58  
59  
60

1  
2  
3  
4 As long-term, integrative studies are lacking, it is unclear how neurocognitive and brain imaging  
5 abnormalities correlate with the staging of bipolar disorder, illness progression and treatment  
6 (35;74) or with changes in biological markers such as neurotropic, inflammatory and oxidative  
7 stress markers (75;76).  
8  
9  
10  
11  
12  
13

### 14 Methods

15  
16 Using a comprehensive neurocognitive test battery, we will assess all participants from the three  
17 groups (patients with bipolar disorder, first-generation relatives, and healthy individuals *without* a  
18 family history of affective disorders). Patients will be followed from first onset of affective disorder  
19 and during successive periods of remission or at an annual basis (bipolar patients with no relapse,  
20 first-generation relatives with no onset, and healthy controls. Among these, a subgroup of 60  
21 patients, 60 healthy relatives (UR) and 30 healthy without a family history of affective disorders  
22 (HC) will be undergo functional and structural MRI at these time points  
23  
24  
25  
26  
27  
28  
29  
30  
31  
32  
33  
34

### 35 Neurocognitive testing

36  
37 Within ‘cold’ cognition verbal learning/memory and executive function have been highlighted as  
38 the most suitable candidates for biomarkers of bipolar disorder (77;78). ‘Cold’ cognition will  
39 therefore be assessed with neurocognitive tests probing verbal memory, attention and executive  
40 function including the Rey Auditory Verbal Learning Test (RAVLT; (79;80)) and the WAIS-III  
41 letter-number sequencing, RBANS digit span, n-back working memory, verbal fluency and Trail  
42 Making Test B. Verbal intelligence will be estimated with the Danish Adult Reading Test (DART).  
43  
44  
45  
46  
47  
48  
49  
50  
51  
52  
53  
54  
55  
56  
57  
58  
59  
60  
‘Hot’ cognition will be assessed with a comprehensive battery of computerized neurocognitive tests  
outside the scanner probing (i) emotional processing (ii) reward processing and (iii) emotion  
regulation. These include the facial expression recognition and faces dot-probe tasks from the

1  
2  
3  
4 Emotional Test Battery (ETB) (P1Vital, Oxford), and an ecologically valid social scenarios test  
5  
6 developed by our group (81). During fMRI we will also administer the following experimental  
7  
8 paradigms: an emotional face processing task using face stimuli from the Nimstim  
9  
10 (<http://www.macbrain.org/resources.htm>), a monetary reward processing task (82), and (iii) a  
11  
12 negative affective picture task using validated stimuli sets from the International Affective Picture  
13  
14 System (IAPS) developed in collaboration with researchers at the Universities of Chicago. In  
15  
16 addition, we will explore the neuronal basis for ‘cold’ cognition (executive function) using n-back  
17  
18 working memory and picture encoding tasks programmed in house (83). Finally, self-report  
19  
20 measures (BIS/BAS, and the CERQ (84)) are used to assess reward responsiveness and habitual  
21  
22 emotional regulation strategies.  
23  
24  
25  
26  
27  
28  
29

### 30 Structural and functional MRI

31  
32 Structural MRI: using T1-weighted images acquired at a 3T Siemens scanner at the Copenhagen  
33  
34 University Hospital, Rigshospitalet, we will focus on lateral ventricular volumes, grey matter  
35  
36 volume of prefrontal cortex, amygdala and hippocampus, relative to whole brain volume.  
37  
38 Specifically, segmentation and analysis of subcortical and regional cortical volume, shape and grey  
39  
40 matter density will be conducted FMRIB Software Library (FSL) tools, including the FMRIB's  
41  
42 Integrated Registration and Segmentation Tool (FIRST), the FSL-VBM tool and FSL vertex (shape)  
43  
44 analysis (<http://fsl.fmrib.ox.ac.uk/>).  
45  
46  
47

48 Functional MRI (fMRI): T2-weighted images will be acquired to investigate white matter hyper-  
49  
50 intensities. We will also use fMRI to investigate neuronal underpinnings of ‘hot’ and ‘cold’  
51  
52 cognition with the previously described experimental paradigms. Functional MRI data processing  
53  
54 will be carried out with the FMRI Expert Analysis Tool, part of FMRIB's Software Library  
55  
56  
57  
58  
59  
60

([www.fmrib.ox.ac.uk/fsl](http://www.fmrib.ox.ac.uk/fsl)). We will examine mean percent BOLD signal change within predefined hippocampal and amygdala Regions of Interest (ROIs) obtained in standard space with mri3dX (<http://www.idoimaging.com/program/160>). In addition, whole-brain exploratory analysis will be conducted to explore neural activity differences in other cortical regions. For this group analysis, individual contrasts of interest will be included in separate general linear models with nonparametric permutation inference (n = 5000) using the ‘randomize’ algorithm implemented in FSL (85).

#### Statistical power

The above sample size for participants undergoing fMRI assessments is determined based on our previous fMRI studies. In particular, inclusion of about 17-22 participants per treatment/diagnostic group (matched for age and gender) had a power of >0.8 to detect differences between groups in neural and cognitive response to emotional faces (e.g. (86;87) and Miskowiak et al, under review) at an alpha-level of  $p < 0.05$  for cross-sectional designs. For longitudinal designs, we were able to demonstrate differences between groups in *the change* in task-related neural activity and in hippocampal structure with a sample of about 40 participants per group (88-90). Given this, our inclusion of 60 participants per group is expected to ensure adequate statistical power for both the cross-sectional and longitudinal parts of the fMRI study.

#### **BIO-4: at risk or prodromal phase for bipolar disorder**

##### Aims

To test whether 1) the composite blood-based biomarker, 2) the composite electronic smartphone-based biomarker and 3) the neurocognitive signature for bipolar disorder predict onset of illness

1  
2  
3  
4 (depression or mania) among a healthy (i.e., non-syndromal level) high risk population of first  
5  
6 degree siblings and offspring to the patients with newly diagnosed/first episode mania/bipolar  
7  
8 disorder, included in BIO-1, BIO-2 and BIO-3.  
9

10 Background and theoretical basis: First-generation relatives to patients with bipolar disorder have a  
11  
12 nine-fold increased risk of developing bipolar disorder and a two to three-fold increased risk of  
13  
14 developing unipolar disorder (1). Although there is a great need for early detection and primary  
15  
16 prevention of onset of illness among relatives to patients with bipolar disorder recent prior attempts  
17  
18 have not been successful due to retrospective designs, poor characterisation of high risk individuals  
19  
20 and small sample sizes (91). This is the first time a composite blood-based, a composite  
21  
22 smartphone-based and a composite neurocognitive biomarker identified among patients with bipolar  
23  
24 disorder will be investigated among their healthy relatives as a predictor measure of onset of illness  
25  
26 (18). This approach increases the chances of obtaining a high specificity and sensitivity of the  
27  
28 composite biomarkers.  
29  
30  
31  
32  
33  
34

### 35 Methods

36  
37 This BIO-4 includes first-generation relatives (siblings and offspring aged 15 to 40 years) to the  
38  
39 recruited patients with first manic or bipolar diagnosis. We expect that at least 200 individuals will  
40  
41 be asymptomatic or present mild symptoms or prodromal patterns to affective disorders and will be  
42  
43 included in the study. Biological tissues will be drawn (as part of BIO-1) and neurocognitive  
44  
45 function will be assessed on all individuals and brain imaging will be done on 60 individuals with  
46  
47 longitudinal assessments.  
48  
49  
50  
51  
52  
53

### 54 Feasibility

55  
56  
57  
58  
59  
60



1  
2  
3  
4 The BIO study is fully feasible as patients are recruited as part of daily health care for patients  
5 referred to the Copenhagen Affective Disorder Clinic.  
6  
7  
8  
9

## 10 Ethical considerations

11  
12 The BIO study has been approved by the Local Ethical Committee (H-7-2014-007) and the data  
13 agency, Capital Region of Copenhagen (RHP-2015-023). The study complies with the Declaration  
14 of Helsinki principles (Seoul, October 2008).  
15  
16  
17  
18  
19

## 20 Dissemination

21  
22 Study results will be presented in peer reviewed journals and at international conferences in  
23 accordance with relevant reporting guidelines (92;93).  
24  
25  
26  
27  
28  
29

## 30 Discussion

### 31 Summary

32  
33 It is expected that the BIO cohort will provide valid biological, electronic, neurocognitive and  
34 neuroimaging data and for the first time longitudinally identify changes in biomarkers during  
35 different stages of bipolar illness, i.e., at risk stage, following onset, during first relapse and  
36 recurrent relapses and in the late stages of the illness as according to Berk et al (15).  
37  
38  
39  
40  
41  
42  
43  
44  
45  
46  
47  
48  
49

### 50 Limitations

51  
52 Some limitations of the BIO study should be noted beforehand. First, the rather extensive initial  
53 assessment study procedure may potentially result in selection of participants that are intrinsically  
54  
55  
56  
57  
58  
59  
60

1  
2  
3  
4 positive towards clinical research and readily willing to cooperate. Nevertheless, we expect that  
5  
6 such selection will be decreased as it is likely that the vast majority of the more than 100 newly  
7  
8 diagnosed/first episode bipolar patients referred to the Copenhagen Affective Disorder Clinic each  
9  
10 year will accept participation in the BIO study as this implies an extensive clinical evaluation.  
11  
12 Second, attrition may increase during long-term follow-up and patients who stay in the study may  
13  
14 adhere more to treatment in general. Such selection is inherent in clinical longitudinal research, and  
15  
16 the large number of participants that will be included will increase external validity. Third, potential  
17  
18 confounding effects of psychotropic medication may influence comparisons between patients with  
19  
20 bipolar disorder and healthy control individuals as well as comparisons within patients as the vast  
21  
22 majority of patients will get medication that may change during the course of illness. Lithium,  
23  
24 mood stabilizers and antipsychotics may have effects on the collected biological, smartphone-based,  
25  
26 neuropsychological and brain imaging data. Effects of medication on biological measures are not  
27  
28 clear (94) although analyses from systematic reviews and meta-analyses involving only bipolar  
29  
30 disorder patients have not found clear effects of medication on cytokines (31;32), BDNF (34), gene  
31  
32 expression (33) nor has subsequent individual studies on cytokines (41;95), BDNF (36;95), gene  
33  
34 expression (43) or DNA and RNA damage (37;38). Effects of medication on electronic smartphone  
35  
36 generated data as well as on neuropsychological and brain imaging data are poorly investigated and  
37  
38 warrants further studies (96).  
39  
40  
41  
42  
43  
44  
45

46 Fourth, due to the large number of biological and statistical tests included in the BIO study, chance  
47  
48 findings may occur in relation to the individual biological test. However, the aim of the BIO study  
49  
50 is to identify a composite biomarker measure related to bipolar illness, depression and mania using  
51  
52 cross validation or alternatively split sample designs in the development and validation of the  
53  
54 composite biomarker.  
55  
56  
57  
58  
59  
60

1  
2  
3  
4  
5  
6  
7  
8  
9  
10  
11  
12  
13  
14  
15  
16  
17  
18  
19  
20  
21  
22  
23  
24  
25  
26  
27  
28  
29  
30  
31  
32  
33  
34  
35  
36  
37  
38  
39  
40  
41  
42  
43  
44  
45  
46  
47  
48  
49  
50  
51  
52  
53  
54  
55  
56  
57  
58  
59  
60

Finally, the BIO study does not include (randomised) interventions limiting casual interpretations of the results. Nevertheless, with the BIO prospective, repeated measures design it is possible to identify valid associations between the composite measures (of biological, electrical, neuropsychological and brain imaging data) and depressive and manic symptoms and states.

### Strengths

The BIO study is the first study aiming to identify 1) a composite blood-based biomarker, 2) a composite electronic smartphone-based biomarker and 3) a neurocognitive signature for bipolar disorder as well as to measure the same biomarkers in newly diagnosed/first episode bipolar patients and their healthy first-generation relatives. It is possible to recruit newly diagnosed/first episode patients with mania/bipolar as all such patients from the entire Capital Region of Denmark are referred to the Copenhagen Affective Disorder Clinic and routinely asked for inclusion in the BIO study. Long-term attrition is supposed to be low as all patients will be followed by the Copenhagen Affective Disorder Clinic for the first two years and subsequently in other treatment settings in the Capital Region of Denmark. Including longitudinal assessment of healthy individuals is of paramount importance to control for the effect of timing and ageing (97), but among all studies on biomarkers in bipolar disorder, this has been done only in two studies from our group (37;41). The study will be performed by an experienced international research group, combining expertise from all areas of the study.

### Conclusion

1  
2  
3  
4 The BIO study is a large long-term cohort study on biomarkers in bipolar disorder and we expect  
5  
6 that the findings for the first time will be representative of biomarkers in bipolar disorder in general  
7  
8 as no prior study on newly diagnosed/first episode bipolar disorder has been conducted. It is  
9  
10 expected that the BIO cohort will provide valid biological, electronically, neuropsychological and  
11  
12 brain imaging longitudinal data.  
13  
14  
15  
16  
17  
18  
19  
20

#### 21 Authors' contribution

22 LVK designed the study together with MV, KM, KWM and MFJ. LVK drafted the study protocol  
23 and the manuscript. All authors contributed to development of the study protocol and to editing the  
24 manuscript and read and approved the final version.

25 KM, LBN, RFS, CE, BKP, HEP, RSM, FK, WFG, and MV contributed specifically to BIO-1 on  
26 peripheral blood-based biomarkers. MFJ, OW, JB, MF and OM contributed specifically to BIO-2  
27 on smartphone-based electronic biomarkers. KWM, GMK and MP contributed specifically to BIO-  
28 3 on neurocognitive and brain imaging signatures. MV contributed specifically to BIO-4 on at risk  
29 or prodromal phase of bipolar disorder (in addition to BIO-1).  
30  
31  
32

#### 33 Funding

34 The study is funded by grants from the Mental Health Services, Capital Region of Denmark, The  
35 Danish Council for Independent Research, Medical Sciences (DFF – 4183-00570), Weimans Fund,  
36 Markedmodningsfonden (the Market Development Fund, (2015-310), Gangstedfonden (A29594),  
37 Helsefonden (16-B-0063), Innovation Fund Denmark (the Innovation Fund, Denmark, 5164-  
38 00001B), Copenhagen Center for Health Technology (CACHET), EU H2020 ITN (EU project  
39 722561), Augustinusfonden (16-0083), Lundbeck foundation (R215-2015-4121).  
40  
41

#### 42 Competing interests

43 LVK has within the preceding three years been a consultant for Lundbeck, AstraZeneca and  
44 Sunovion. KWM has received consultancy fees in the past three years from Lundbeck and Allergan.  
45 MFJ has been a consultant for Eli Lilly and Lundbeck. MV has within the preceding three years  
46 been a consultant for Astra Zeneca and Servier. FK has been a speaker for Ache, Daiichi Sankyo  
47 and Janssen. MP is a consultant for Roche Pharmaceuticals.

48 RSM: Advisory Boards: Lundbeck, Pfizer, AstraZeneca, Elli-Lilly, Janssen, Ortho Purdue, Johnson  
49 & Johnson, Moksha8, Sunovion, Mitsubishi, Takeda, Forest, Otsuka, Bristol-Myers Squibb, Shire,  
50 Speakers Fees: Lundbeck, Pfizer, AstraZeneca, Elli-Lilly, JanssenOrtho, Purdue, Johnson &  
51 Johnson, Moksha8, Sunovion, Mitsubishi, Takeda, Forest, Otsuka, Bristol-Myers Squibb, Shire,  
52 Research Grants: Lundbeck, JanssenOrtho, Shire, Purdue, AstraZeneca, Pfizer, Otsuka, Allergan.  
53 HEP has received a research Grant from Boeringer Ingelheim. GMK has received honoraria as  
54 Field Editor of the International Journal of Neuropsychopharmacology and as scientific advisor for  
55 H Lundbeck A/S. JEB and MF are co-founders and shareholders in Monsenso.  
56  
57  
58  
59  
60

1  
2  
3  
4 LBN, RFS and WFG declare no competing interests.  
5

6 The validity of the research cannot be influenced by any of these potential secondary interest (such  
7 as financial gain or personal relationship).  
8

9  
10 Patient consent  
11 Obtained

12  
13 Ethical approval  
14 The study has been approved by the Local Ethical Committee (H-7-2014-007) and the data agency,  
15 Capital Region of Copenhagen (RHP-2015-023).  
16

17  
18 Study registration  
19 The BIO study has been registered at clinicaltrials.gov with Trial Registration Number:  
20 NCT02888262.  
21  
22  
23  
24  
25  
26  
27  
28  
29  
30  
31  
32  
33  
34  
35  
36  
37  
38  
39  
40  
41  
42  
43  
44  
45  
46  
47  
48  
49  
50  
51  
52  
53  
54  
55  
56  
57  
58  
59  
60

Table 1. Overview of the longitudinal assessments during risk periods and following onset of bipolar disorder in the four sub-studies of the BIO study.

| Course | Healthy first-gen. relatives | First episode | Remission | First relapse | Remission | Second relapse | Etc. |
|--------|------------------------------|---------------|-----------|---------------|-----------|----------------|------|
| BIO-1  | x                            | x             | x         | x             | x         | x              | x    |
| BIO-2  | x                            | x             | x         | x             | x         | x              | x    |
| BIO-3  | x                            |               | x         |               | x         |                | x    |
| BIO-4  | x                            | x             | x         | x             | x         | x              | x    |

BIO-1: Peripheral blood-based biomarker in bipolar disorder

BIO-2: Smartphone-based electronic biomarker in bipolar disorder

BIO-3: Neurocognitive and brain imaging signatures in bipolar disorder

BIO-4: At risk or prodromal phase for bipolar disorder

## Reference List

1. Lohoff FW, Berettini WH. Genetics of bipolar disorder. In: Yatham LN, Maj M, eds. *Bipolar disorder: Clinical and neurobiological foundations*. Singapore: Wiley-Blackwell 2010:110-23.
2. Kessing LV, Hansen MG, Andersen PK, Angst J. The predictive effect of episodes on the risk of recurrence in depressive and bipolar disorders - a life-long perspective. *Acta Psychiatr Scand* 2004;109:339-44.
3. Kessing LV, Hansen MG, Andersen PK. Course of illness in depressive and bipolar disorders. Naturalistic study, 1994-1999. *Br J Psychiatry* 2004;185:372-7.
4. Post RM, Fleming J, Kapczinski F. Neurobiological correlates of illness progression in the recurrent affective disorders. *J Psychiatr Res* 2012.
5. Schneider MR, DelBello MP, McNamara RK, Strakowski SM, Adler CM. Neuroprogression in bipolar disorder. *Bipolar Disord* 2012;14:356-74.
6. Kessing LV, Nilsson FM. Increased risk of developing dementia in patients with major affective disorders compared to patients with other medical illnesses. *J Affect Disord* 2003;73:261-9.
7. Kessing LV, Andersen PK. Does the risk of developing dementia increase with the number of episodes in patients with depressive disorder and in patients with bipolar disorder? *J Neurol Neurosurg Psychiatry* 2004;75:1662-6.
8. da SJ, Goncalves-Pereira M, Xavier M, Mukaetova-Ladinska EB. Affective disorders and risk of developing dementia: systematic review. *Br J Psychiatry* 2013;202:177-86.
9. Kessing LV, Andersen PK. Evidence for clinical progression of unipolar and bipolar disorders. *Acta Psychiatr.Scand.* 2016 (in press).
10. Kessing LV. Diagnostic stability in bipolar disorder in clinical practise as according to ICD-10. *J Affect Disord* 2005;85:293-9.
11. Baldessarini RJ, Tondo L, Baethge CJ, Lepri B, Bratti IM. Effects of treatment latency on response to maintenance treatment in manic-depressive disorders. *Bipolar Disord* 2007;9:386-93.
12. Phillips ML, Kupfer DJ. Bipolar disorder diagnosis: challenges and future directions. *Lancet* 2013;381:1663-71.
13. Papakostas GI, Shelton RC, Kinrys G et al. Assessment of a multi-assay, serum-based biological diagnostic test for major depressive disorder: a pilot and replication study. *Mol Psychiatry* 2013;18:332-9.
14. Fries GR, Pfaffenseller B, Stertz L et al. Staging and neuroprogression in bipolar disorder. *Curr Psychiatry Rep* 2012;14:667-75.

15. Berk M, Berk L, Dodd S et al. Stage managing bipolar disorder. *Bipolar Disord* 2013.
16. McIntyre RS. Predicting and preventing bipolar disorder: the need to fundamentally advance the strategic approach. *Bipolar Disorder*. 2014 (in press).
17. Grande I, Magalhaes PV, Chendo I et al. Staging bipolar disorder: clinical, biochemical, and functional correlates. *Acta Psychiatr Scand* 2014;129:437-44.
18. Kapczinski F, Magalhaes PV, Balanza-Martinez V et al. Staging systems in bipolar disorder: an International Society for Bipolar Disorders Task Force Report. *Acta Psychiatr Scand* 2014.
19. Kessing LV, Hansen HV, Hvenegaard A et al. Treatment in a specialised out-patient mood disorder clinic v. standard out-patient treatment in the early course of bipolar disorder: randomised clinical trial. *Br J Psychiatry* 2013;202:212-9.
20. First MB, Spitzer M, Gibbon M, Williams JB. Structured Clinical Interview for DSM-IV-TR Axis I Disorders. New York: Biometrics Research Department, New York State Psychiatric Institute, New York., 2002.
21. Wing JK, Babor T, Brugha T et al. SCAN. Schedules for Clinical Assessment in Neuropsychiatry. *Arch Gen Psychiatry* 1990;47:589-93.
22. Hamilton M. A rating scale for depression. *J Neurol Neurosurg Psychiatry* 1960;23:56-62.
23. Young RC, Biggs JT, Ziegler VE, Meyer DA. A rating scale for mania: reliability, validity and sensitivity. *Br J Psychiatry* 1978;133:429-35.
24. Rosa AR, Sanchez-Moreno J, Martinez-Aran A et al. Validity and reliability of the Functioning Assessment Short Test (FAST) in bipolar disorder. *Clin Pract Epidemiol Ment Health* 2007;3:5.
25. Angst J, Adolfsson R, Benazzi F et al. The HCL-32: towards a self-assessment tool for hypomanic symptoms in outpatients. *J Affect Disord* 2005;88:217-33.
26. Bukh JD, Bock C, Vinberg M, Gether U, Kessing LV. Clinical utility of Standardised Assessment of Personality - Abbreviated Scale (SAPAS) among patients with first episode depression. *J Affect Disord* 2010;127:199-202.
27. Bech P, Olsen LR, Kjoller M, Rasmussen NK. Measuring well-being rather than the absence of distress symptoms: a comparison of the SF-36 Mental Health subscale and the WHO-Five Well-Being Scale. *Int J Methods Psychiatr Res* 2003;12:85-91.
28. Kessing LV, Hansen HV, Ruggeri M, Bech P. Satisfaction with treatment among patients with depressive and bipolar disorders. *Soc Psychiatry Psychiatr Epidemiol* 2006;41:148-55.
29. Stalder T, Kirschbaum C. Analysis of cortisol in hair--state of the art and future directions. *Brain Behav Immun* 2012;26:1019-29.
30. Shalev I, Moffitt TE, Wong TY et al. Retinal vessel caliber and lifelong neuropsychological



functioning: retinal imaging as an investigative tool for cognitive epidemiology. *Psychol Sci* 2013;24:1198-207.

31. Munkholm K, Vinberg M, Kessing LV. Cytokines in bipolar disorder: a systematic review and meta-analysis. *J Affect Disord* 2013;144:16-27.
32. Munkholm K, Brauner JV, Kessing LV, Vinberg M. Cytokines in bipolar disorder vs. healthy control subjects: a systematic review and meta-analysis. *J Psychiatr Res* 2013;47:1119-33.
33. Munkholm K, Vinberg M, Berk M, Kessing LV. State-related alterations of gene expression in bipolar disorder: a systematic review. *Bipolar Disord* 2012;14:684-96.
34. Munkholm K, Vinberg M, Kessing LV. Peripheral blood brain-derived neurotrophic factor in bipolar disorder: a comprehensive systematic review and meta-analysis. *Mol Psychiatry* 2015.
35. Frey BN, Andreazza AC, Houenou J et al. Biomarkers in bipolar disorder: a positional paper from the International Society for Bipolar Disorders Biomarkers Task Force. *Aust N Z J Psychiatry* 2013;47:321-32.
36. Munkholm K, Pedersen BK, Kessing LV, Vinberg M. Elevated levels of plasma brain derived neurotrophic factor in rapid cycling bipolar disorder patients. *Psychoneuroendocrinology* 2014;47:199-211.
37. Jacoby AS, Vinberg M, Poulsen HE, Kessing LV, Munkholm K. Increased DNA and RNA damage by oxidation in patients with bipolar I disorder. *Transl Psychiatry* 2016;6:e867.
38. Munkholm K, Poulsen HE, Kessing LV, Vinberg M. Elevated levels of urinary markers of oxidatively generated DNA and RNA damage in bipolar disorder. *Bipolar Disord* 2015;17:257-68.
39. Munkholm K, Peijs L, Kessing LV, Vinberg M. Reduced mRNA expression of PTGDS in peripheral blood mononuclear cells of rapid-cycling bipolar disorder patients compared with healthy control subjects. *Int J Neuropsychopharmacol* 2015;18.
40. Jacoby AS, Munkholm K, Vinberg M et al. Glycogen synthase kinase-3beta in patients with bipolar I disorder: results from a prospective study. *Bipolar Disord* 2016;18:334-41.
41. Munkholm K, Weikop P, Kessing LV, Vinberg M. Elevated levels of IL-6 and IL-18 in manic and hypomanic states in rapid cycling bipolar disorder patients. *Brain Behav Immun* 2015;43:205-13.
42. Goldstein BI, Young LT. Toward clinically applicable biomarkers in bipolar disorder: focus on BDNF, inflammatory markers, and endothelial function. *Curr Psychiatry Rep* 2013;15:425.
43. Munkholm K, Peijs L, Vinberg M, Kessing LV. A composite peripheral blood gene expression measure as a potential diagnostic biomarker in bipolar disorder. *Transl Psychiatry* 2015;5:e614.

- 1  
2  
3  
4 44. Dickerson F, Schroeder J, Stallings C, Origoni A, Bahn S, Yolken R. Multianalyte markers  
5 of schizophrenia and bipolar disorder: A preliminary study. *Schizophr Res* 2015;168:450-5.  
6  
7 45. Haenisch F, Cooper JD, Reif A et al. Towards a blood-based diagnostic panel for bipolar  
8 disorder. *Brain Behav Immun* 2016;52:49-57.  
9  
10 46. Berk M, Conus P, Lucas N et al. Setting the stage: from prodrome to treatment resistance in  
11 bipolar disorder. *Bipolar Disord* 2007;9:671-8.  
12  
13 47. Brink-Jensen K, Bak S, Jorgensen K, Ekstrom CT. Integrative analysis of metabolomics and  
14 transcriptomics data: a unified model framework to identify underlying system pathways.  
15 *PLoS One* 2013;8:e72116.  
16  
17 48. Hastie T, Tibshirani R, Friedman J. Penalised regression. *The Elements of Statistical*  
18 *Learning: Data Mining, Inference, and Prediction*, Second Edition. Springer Verlag., 2009.  
19  
20 49. Phelps J, Ghaemi SN. The mistaken claim of bipolar 'overdiagnosis': solving the false  
21 positives problem for DSM-5/ICD-11. *Acta Psychiatr Scand* 2012;126:395-401.  
22  
23 50. Bopp JM, Miklowitz DJ, Goodwin GM, Stevens W, Rendell JM, Geddes JR. The  
24 longitudinal course of bipolar disorder as revealed through weekly text messaging: a  
25 feasibility study. *Bipolar Disord* 2010;12:327-34.  
26  
27 51. Bardram, J. E., Frost, M., Szántó, K., Faurholt-Jepsen, M., Vinberg, M., and Kessing, L. V.  
28 Designing Mobile Health Technology for Bipolar Disorder: A Field Trial of the  
29 MONARCA System. *Proceedings of the SIGCHI Conference on Human Factors in*  
30 *Computing Systems*. and . 2627-2636. 2013.  
31  
32 Ref Type: Conference Proceeding  
33  
34 52. Faurholt-Jepsen M, Frost M, Ritz C et al. Daily electronic self-monitoring in bipolar  
35 disorder using smartphones - the MONARCA I trial: a randomized, placebo-controlled,  
36 single-blind, parallel group trial. *Psychol Med* 2015;1-14.  
37  
38 53. Frost, M., Doryab, A., Faurholt-Jepsen, M., Kessing, L. V., and Bardram, J. E. Supporting  
39 disease insight through data analysis: refinements of the monarca self-assessment system.  
40 20143. *Proceedings of the 2013 ACM international joint conference on Pervasive and*  
41 *ubiquitous computing*, ACM Press, New York, NY, USA.  
42  
43 Ref Type: Conference Proceeding  
44  
45 54. Bardram, J. E., Frost, M., Szántó, K., and Marcu, G. The MONARCA self-assessment  
46 system: a persuasive personal monitoring system for bipolar patients. In *Proceedings of the*  
47 *2nd ACM SIGHIT International Health Informatics Symposium (IHI '12)*. ACM, New  
48 York, NY, USA, 21-30. DOI=<http://dx.doi.org/10.1145/2110363.2110370>. 2012.  
49  
50 Ref Type: Conference Proceeding  
51  
52 55. Gravenhorst F, Muaremi A, Bardram J et al. Mobile phones as medical devices in mental  
53 disorder treatment: an overview. *Journal of Ubiquitous Computing* 2015;19:335-53.  
54  
55 56. Faurholt-Jepsen M, Frost M, Vinberg M, Christensen EM, Bardram JE, Kessing LV.  
56 Smartphone data as objective measures of bipolar disorder symptoms. *Psychiatry Res*  
57  
58  
59  
60

- 2014;217:124-7.
57. Faurholt-Jepsen M, Vinberg M, Frost M, Christensen EM, Bardram J, Kessing LV. Smartphone data as an electronic biomarker of illness activity in bipolar disorder. *Bipolar Disord* 2015;7:15-28.
  58. Faurholt-Jepsen M, Busk J, Frost M et al. Voice analysis as an objective state marker in bipolar disorder. *Transl Psychiatry* 2016;6:e856.
  59. Torres IJ, Boudreau VG, Yatham LN. Neuropsychological functioning in euthymic bipolar disorder: a meta-analysis. *Acta Psychiatr Scand Suppl* 2007;17-26.
  60. Bora E, Yucel M, Pantelis C. Cognitive endophenotypes of bipolar disorder: a meta-analysis of neuropsychological deficits in euthymic patients and their first-degree relatives. *J Affect Disord* 2009;113:1-20.
  61. Mann-Wrobel MC, Carreno JT, Dickinson D. Meta-analysis of neuropsychological functioning in euthymic bipolar disorder: an update and investigation of moderator variables. *Bipolar Disord* 2011;13:334-42.
  62. Bourne C, Aydemir O, Balanza-Martinez V et al. Neuropsychological testing of cognitive impairment in euthymic bipolar disorder: an individual patient data meta-analysis. *Acta Psychiatr Scand* 2013;128:149-62.
  63. Depp CA, Mausbach BT, Harmell AL et al. Meta-analysis of the association between cognitive abilities and everyday functioning in bipolar disorder. *Bipolar Disord* 2012;14:217-26.
  64. Rosa AR, Magalhaes PV, Czepielewski L et al. Clinical staging in bipolar disorder: focus on cognition and functioning. *J Clin Psychiatry* 2014;75:e450-e456.
  65. Samame C, Martino DJ, Strejilevich SA. Longitudinal course of cognitive deficits in bipolar disorder: a meta-analytic study. *J Affect Disord* 2014;164:130-8.
  66. Kessing LV, Olsen EW, Mortensen PB, Andersen PK. Dementia in affective disorder: a case-register study. *Acta Psychiatr Scand* 1999;100:176-85.
  67. Wu KY, Chang CM, Liang HY et al. Increased risk of developing dementia in patients with bipolar disorder: a nested matched case-control study. *Bipolar Disord* 2013;15:787-94.
  68. Chen MH, Li CT, Tsai CF et al. Risk of subsequent dementia among patients with bipolar disorder or major depression: a nationwide longitudinal study in Taiwan. *J Am Med Assoc* 2015;16:504-8.
  69. Strakowski SM, Adler CM, Holland SK, Mills N, DelBello MP. A preliminary fMRI study of sustained attention in euthymic, unmedicated bipolar disorder. *Neuropsychopharmacology* 2004;29:1734-40.
  70. Kerr N, Dunbar RI, Bentall RP. Theory of mind deficits in bipolar affective disorder. *J Affect Disord* 2003;73:253-9.

- 1
- 2
- 3
- 4 71. Wessa M, Linke J. Emotional processing in bipolar disorder: behavioural and neuroimaging
- 5 findings. *Int Rev Psychiatry* 2009;21:357-67.
- 6
- 7 72. Phillips ML, Swartz HA. A Critical Appraisal of Neuroimaging Studies of Bipolar Disorder:
- 8 Toward a New Conceptualization of Underlying Neural Circuitry and a Road Map for
- 9 Future Research. *Am J Psychiatry* 2014.
- 10
- 11 73. Hallahan B, Newell J, Soares JC et al. Structural magnetic resonance imaging in bipolar
- 12 disorder: an international collaborative mega-analysis of individual adult patient data. *Biol*
- 13 *Psychiatry* 2011;69:326-35.
- 14
- 15 74. Mora E, Portella MJ, Forcada I, Vieta E, Mur M. Persistence of cognitive impairment and its
- 16 negative impact on psychosocial functioning in lithium-treated, euthymic bipolar patients: a
- 17 6-year follow-up study. *Psychol Med* 2013;43:1187-96.
- 18
- 19 75. Bauer IE, Pascoe MC, Wollenhaupt-Aguiar B, Kapczinski F, Soares JC. Inflammatory
- 20 mediators of cognitive impairment in bipolar disorder. *J Psychiatr Res* 2014.
- 21
- 22 76. Lim CS, Baldessarini RJ, Vieta E, Yucel M, Bora E, Sim K. Longitudinal neuroimaging and
- 23 neuropsychological changes in bipolar disorder patients: review of the evidence. *Neurosci*
- 24 *Biobehav Rev* 2013;37:418-35.
- 25
- 26 77. Balanza-Martinez V, Rubio C, Selva-Vera G et al. Neurocognitive endophenotypes
- 27 (endophenocognitypes) from studies of relatives of bipolar disorder subjects: a systematic
- 28 review. *Neurosci Biobehav Rev* 2008;32:1426-38.
- 29
- 30 78. Raust A, Daban C, Cochet B, Henry C, Bellivier F, Scott J. Neurocognitive performance as
- 31 an endophenotype for bipolar disorder. *Front Biosci (Elite Ed)* 2014;6:89-103.
- 32
- 33 79. Rey A. Psychological examination of traumatic encephalopathy. *Archives de*
- 34 *Psychologic* 1941;28:286-340.
- 35
- 36 80. Rey A. L'examen clinique en psychologie [Clinical tests in psychology]. Paris.:  
37 Presses Universitaires de France., 1964.
- 38
- 39 81. Kjaerstad HL, Vinberg M, Goldin PR et al. Impaired down-regulation of negative emotion
- 40 in self-referent social situations in bipolar disorder: A pilot study of a novel experimental
- 41 paradigm. *Psychiatry Res* 2016;238:318-25.
- 42
- 43 82. Chase HW, Nusslock R, Almeida JR, Forbes EE, LaBarbara EJ, Phillips ML. Dissociable
- 44 patterns of abnormal frontal cortical activation during anticipation of an uncertain reward or
- 45 loss in bipolar versus major depression. *Bipolar Disord* 2013;15:839-54.
- 46
- 47 83. Miskowiak K, O'Sullivan U, Harmer CJ. Erythropoietin enhances hippocampal response
- 48 during memory retrieval in humans. *J Neurosci* 2007;27:2788-92.
- 49
- 50 84. Garnefski N, Kraaij V, SP. Negative life events,cognitive emotionregulation and
- 51 emotional problems. *Pers Individ Differ* 2001;30:1311-27.
- 52
- 53 85. Winkler AM, Ridgway GR, Webster MA, Smith SM, Nichols TE. Permutation inference for
- 54
- 55
- 56
- 57
- 58
- 59
- 60

1  
2  
3  
4 the general linear model. *Neuroimage* 2014;92:381-97.  
5

- 6 86. Miskowiak K, O'Sullivan U, Harmer CJ. Erythropoietin reduces neural and cognitive  
7 processing of fear in human models of antidepressant drug action. *Biol Psychiatry*  
8 2007;62:1244-50.  
9
- 10 87. Miskowiak K, Glerup L, Vestbo C et al. Different neural and cognitive response to  
11 emotional faces in healthy monozygotic twins at risk of depression. *Psychological Medicine*  
12 2015;45:1447-58.  
13
- 14 88. Miskowiak KW, Vinberg M, Macoveanu J et al. Effects of Erythropoietin on Hippocampal  
15 Volume and Memory in Mood Disorders. *Biol Psychiatry* 2015;78:270-7.  
16
- 17 89. Miskowiak KW, Macoveanu J, Vinberg M et al. Effects of erythropoietin on memory-  
18 relevant neurocircuitry activity and recall in mood disorders. *Acta Psychiatr Scand*  
19 2016;134:249-59.  
20
- 21 90. Miskowiak KW, Vinberg M, Glerup L et al. Neural correlates of improved executive  
22 function following erythropoietin treatment in mood disorders. *Psychol Med* 2016;46:1679-  
23 91.  
24
- 25 91. Brietzke E, Mansur RB, Soczynska JK, Kapczynski F, Bressan RA, McIntyre RS. Towards a  
26 multifactorial approach for prediction of bipolar disorder in at risk populations. *J Affect*  
27 *Disord* 2012;140:82-91.  
28
- 29 92. Gallo V, Egger M, McCormack V et al. STrengthening the Reporting of OBservational  
30 studies in Epidemiology - Molecular Epidemiology (STROBE-ME): an extension of the  
31 STROBE statement. *Eur J Clin Invest* 2012;42:1-16.  
32
- 33 93. von EE, Altman DG, Egger M, Pocock SJ, Gøtzsche PC, Vandenbroucke JP. The  
34 Strengthening the Reporting of Observational Studies in Epidemiology (STROBE)  
35 Statement: guidelines for reporting observational studies. *Int J Surg* 2014;12:1495-9.  
36
- 37 94. van den Amele S, van DL, Staels W et al. The effect of mood-stabilizing drugs on cytokine  
38 levels in bipolar disorder: A systematic review. *J Affect Disord* 2016;203:364-73.  
39
- 40 95. Jacoby AS, Munkholm K, Vinberg M, Pedersen BK, Kessing LV. Cytokines, brain-derived  
41 neurotrophic factor and C-reactive protein in bipolar I disorder - Results from a prospective  
42 study. *J Affect Disord* 2016;197:167-74.  
43
- 44 96. Laidi C, Houenou J. Brain functional effects of psychopharmacological treatments in bipolar  
45 disorder. *Eur Neuropsychopharmacol* 2016.  
46
- 47 97. Munkholm K, Lenskjold T, Jacoby AS et al. Glycogen Synthase Kinase-3beta: Variation  
48 over Time and the Possible Association with Mood and Cognition in Healthy Individuals.  
49 *Neuropsychobiology* 2016;73:108-15.  
50  
51  
52  
53  
54  
55  
56  
57  
58  
59  
60

# BMJ Open

## The Bipolar Illness Onset study - research protocol for the BIO cohort study

|                                 |                                                                                                                                                                                                                                                                                                                                                                                                                                                                                                                                                                                                                                                                                                                                                                                                                                                                                                                                                                                                                                                                                                                                                                                                                                                                                                                                                                                                                                                                                                                                                                                                                                                                                                                                                                    |
|---------------------------------|--------------------------------------------------------------------------------------------------------------------------------------------------------------------------------------------------------------------------------------------------------------------------------------------------------------------------------------------------------------------------------------------------------------------------------------------------------------------------------------------------------------------------------------------------------------------------------------------------------------------------------------------------------------------------------------------------------------------------------------------------------------------------------------------------------------------------------------------------------------------------------------------------------------------------------------------------------------------------------------------------------------------------------------------------------------------------------------------------------------------------------------------------------------------------------------------------------------------------------------------------------------------------------------------------------------------------------------------------------------------------------------------------------------------------------------------------------------------------------------------------------------------------------------------------------------------------------------------------------------------------------------------------------------------------------------------------------------------------------------------------------------------|
| Journal:                        | <i>BMJ Open</i>                                                                                                                                                                                                                                                                                                                                                                                                                                                                                                                                                                                                                                                                                                                                                                                                                                                                                                                                                                                                                                                                                                                                                                                                                                                                                                                                                                                                                                                                                                                                                                                                                                                                                                                                                    |
| Manuscript ID                   | bmjopen-2016-015462.R1                                                                                                                                                                                                                                                                                                                                                                                                                                                                                                                                                                                                                                                                                                                                                                                                                                                                                                                                                                                                                                                                                                                                                                                                                                                                                                                                                                                                                                                                                                                                                                                                                                                                                                                                             |
| Article Type:                   | Protocol                                                                                                                                                                                                                                                                                                                                                                                                                                                                                                                                                                                                                                                                                                                                                                                                                                                                                                                                                                                                                                                                                                                                                                                                                                                                                                                                                                                                                                                                                                                                                                                                                                                                                                                                                           |
| Date Submitted by the Author:   | 29-Mar-2017                                                                                                                                                                                                                                                                                                                                                                                                                                                                                                                                                                                                                                                                                                                                                                                                                                                                                                                                                                                                                                                                                                                                                                                                                                                                                                                                                                                                                                                                                                                                                                                                                                                                                                                                                        |
| Complete List of Authors:       | <p>Kessing, Lars; Copenhagen University Hospital, Psychiatric Center Copenhagen<br/> Munkholm, Klaus; Psychiatric Center Copenhagen, Department O, Rigshospitalet<br/> Faurholt-Jepsen, Maria; Psychiatric Center Copenhagen, Department O<br/> Miskowiak, Kamilla ; Psychiatric Center Copenhagen, Department O<br/> Nielsen, Lars; Rigshospitalet, Department of Clinical Biochemistry<br/> Frikke-Schmidt, Ruth; Rigshospitalet, Department of Clinical Biochemistry<br/> Ekstrøm, Claus; University of Copenhagen, Department of Biostatistics<br/> Winther, Ole; Technical University of Denmark, Department of Applied Mathematics and Computer Science<br/> Pedersen, Bente; Copenhagen University Hospital, The Centre of Inflammation and Metabolism at Department of Infectious Diseases<br/> Poulsen, Henrik ; Rigshospitalet, Laboratory of Clinical Pharmacology<br/> McIntyre , RS ; Canada McMaster University, Brain and Cognitive Discovery Foundation, Toronto, Ont.<br/> Kapczinski, Flavio; McMaster University<br/> Gattaz , Wagner; University of São Paulo, Department and Institute of Psychiatry, and Laboratory of Neuroscience (LIM27)<br/> Bardram, Jakob ; Technical University of Denmark, Department of Applied Mathematics and Computer Science<br/> Frost, Mads; IT University og Copenhagen, PIT lab<br/> Mayora, Oscar; Center for Research and Telecommunications Experimentation for Networked Communities<br/> Knudsen, Gitte ; Rigshospitalet, Neurobiology Research Unit and of Center for Integrated Molecular Brain Imaging<br/> Phillips, Mary; University of Pittsburgh, and the Western Psychiatric Institute and Clinic, Department of Psychiatry<br/> Vinberg, Maj; Psychiatric Center Copenhagen, Department O</p> |
| <b>Primary Subject Heading</b>: | Mental health                                                                                                                                                                                                                                                                                                                                                                                                                                                                                                                                                                                                                                                                                                                                                                                                                                                                                                                                                                                                                                                                                                                                                                                                                                                                                                                                                                                                                                                                                                                                                                                                                                                                                                                                                      |
| Secondary Subject Heading:      | Mental health                                                                                                                                                                                                                                                                                                                                                                                                                                                                                                                                                                                                                                                                                                                                                                                                                                                                                                                                                                                                                                                                                                                                                                                                                                                                                                                                                                                                                                                                                                                                                                                                                                                                                                                                                      |
| Keywords:                       | Depression & mood disorders < PSYCHIATRY, bipolar disorder, smartphone, biomarker, MRI scanning, cognition                                                                                                                                                                                                                                                                                                                                                                                                                                                                                                                                                                                                                                                                                                                                                                                                                                                                                                                                                                                                                                                                                                                                                                                                                                                                                                                                                                                                                                                                                                                                                                                                                                                         |
|                                 |                                                                                                                                                                                                                                                                                                                                                                                                                                                                                                                                                                                                                                                                                                                                                                                                                                                                                                                                                                                                                                                                                                                                                                                                                                                                                                                                                                                                                                                                                                                                                                                                                                                                                                                                                                    |

1  
2  
3  
4  
5  
6  
7  
8  
9  
10  
11  
12  
13  
14  
15  
16  
17  
18  
19  
20  
21  
22  
23  
24  
25  
26  
27  
28  
29  
30  
31  
32  
33  
34  
35  
36  
37  
38  
39  
40  
41  
42  
43  
44  
45  
46  
47  
48  
49  
50  
51  
52  
53  
54  
55  
56  
57  
58  
59  
60

SCHOLARONE™  
Manuscripts

For peer review only



# The Bipolar Illness Onset study - research protocol for the BIO cohort study

Lars Vedel Kessing, professor, MD, DMSc<sup>1,2</sup>  
Klaus Munkholm, MD, DMSc<sup>1</sup>  
Maria Faurholt-Jepsen, MD<sup>1</sup>  
Kamilla Woznica Miskowiak, associated professor, MSc, PhD<sup>1,2</sup>  
Lars Bo Nielsen, professor, MD, DMSc<sup>2,3</sup>  
Ruth Frikke-Schmidt, associated professor, MD, PhD, DMSc<sup>2,3</sup>  
Claus Ekstrøm, professor, MSc, PhD<sup>4</sup>  
Ole Winther, professor, MSc, PhD<sup>5,6</sup>  
Bente Klarlund Pedersen, professor, MD, DMSc<sup>7</sup>  
Henrik Enghusen Poulsen, professor, MD, DMSc<sup>8</sup>  
Roger S. McIntyre, professor, MD, FRCPC<sup>9</sup>  
Flavio Kapczinski, professor, MD, PhD, FRCPC<sup>10</sup>  
Wagner F. Gattaz, professor, MD, PhD<sup>11</sup>  
Jakob Bardram, professor, MSc, PhD<sup>5</sup>  
Mads Frost, MSc, PhD<sup>12</sup>  
Oscar Mayora, MSc, PhD<sup>13</sup>  
Gitte Moos Knudsen, professor, MD, DMSc<sup>14</sup>  
Mary Phillips, professor, MD, PhD<sup>15</sup>  
Maj Vinberg, associated professor, MD, PhD, DMSc<sup>1,2</sup>

Psychiatric Center Copenhagen, Department O, Denmark<sup>1</sup>  
University of Copenhagen, Institute of Clinical Medicine, Denmark<sup>2</sup>  
Department of Clinical Biochemistry, Rigshospitalet, Denmark<sup>3</sup>  
Department of Biostatistics, University of Copenhagen, Denmark<sup>4</sup>  
Technical University of Denmark, Department of Applied Mathematics and Computer Science, Denmark<sup>5</sup>  
Gene Regulation Bioinformatics at the Bioinformatics Centre, Dept. of Biology/BRIC, University of Copenhagen, Denmark<sup>6</sup>  
The Centre of Inflammation and Metabolism at Department of Infectious Diseases, Rigshospitalet, Copenhagen, Denmark<sup>7</sup>  
Laboratory of Clinical Pharmacology, Rigshospitalet, Denmark<sup>8</sup>  
Department of Psychiatry and Pharmacology, University of Toronto, Brain and Cognitive Discovery Foundation, Toronto, On., Canada<sup>9</sup>  
McMaster University, Canada<sup>10</sup>  
Department and Institute of Psychiatry, and Laboratory of Neuroscience (LIM27), University of São Paulo Medical School, Brazil<sup>11</sup>  
IT University Copenhagen, Denmark<sup>12</sup>  
Create-Net: Center for Research and Telecommunications Experimentation for Networked Communities, Trento, Italy<sup>13</sup>  
Neurobiology Research Unit and of Center for Integrated Molecular Brain Imaging, Rigshospitalet, Denmark<sup>14</sup>  
Department of Psychiatry, University of Pittsburgh, and the Western Psychiatric Institute and Clinic, Pittsburgh, USA<sup>15</sup>



1  
2  
3  
4  
5 **Correspondence to:**

6 Lars Vedel Kessing, Psychiatric Center Copenhagen, Department O, 6233

7 Blegdamsvej 9, 2100 Copenhagen, Denmark

8 and University of Copenhagen, Faculty of Health and Medical Sciences

9 Tel.: 45 - 38 64 70 81

10 Mail: lars.vedel.kessing@regionh.dk  
11  
12  
13  
14  
15  
16  
17  
18  
19  
20  
21  
22  
23  
24  
25  
26  
27  
28  
29  
30  
31  
32  
33  
34  
35  
36  
37  
38  
39  
40  
41  
42  
43  
44  
45  
46  
47  
48  
49  
50  
51  
52  
53  
54  
55  
56  
57  
58  
59  
60

For peer review only

1  
2  
3  
4 **Introduction:** Bipolar disorder is an often disabling mental illness with a lifetime prevalence of 1-  
5  
6 2%, a high risk of recurrence of manic and depressive episodes, a lifelong elevated risk of suicide  
7  
8 and a substantial heritability. The course of illness is frequently characterised by progressive  
9  
10 shortening of inter-episode intervals with each recurrence and increasing cognitive dysfunction in a  
11  
12 subset of individuals with this condition. Clinically, diagnostic boundaries between bipolar disorder  
13  
14 and other psychiatric disorders such as unipolar depression are unclear although pharmacological  
15  
16 and psychological treatment differs substantially. Patients with bipolar disorder are often  
17  
18 misdiagnosed and the mean delay between onset and diagnosis is 5-10 years. Although the risk of  
19  
20 relapse of depression and mania is high it is for most patients impossible to predict and  
21  
22 consequently prevent upcoming episodes in an individual tailored way. The identification of  
23  
24 objective biomarkers can both inform bipolar disorder diagnosis and provide biological targets for  
25  
26 the development of new and personalized treatments. Accurate diagnosis of bipolar disorder in its  
27  
28 early stages could help to prevent the long-term detrimental effects of the illness.  
29  
30

31  
32 The present Bipolar Onset study (BIO) study aims to identify 1) a composite blood-based biomarker  
33  
34 2) a composite electronic smartphone-based biomarker and 3) a neurocognitive and neuroimaging  
35  
36 based signature for bipolar disorder.  
37  
38

39 **Methods and analysis:** The study will include 300 patients with newly diagnosed/first episode  
40  
41 bipolar disorder, 200 of their healthy siblings or offspring, and 100 healthy individuals without a  
42  
43 family history of affective disorder. All participants will be followed longitudinally with repeated  
44  
45 blood samples and other biological tissues, self-monitored and automatically generated smartphone  
46  
47 data, neuropsychological tests and a subset of the cohort with neuroimaging during a 5-10 year  
48  
49 study period.  
50  
51

52 **Ethics and dissemination:** The study has been approved by the Local Ethical Committee (H-7-  
53  
54 2014-007) and the data agency, Capital Region of Copenhagen (RHP-2015-023).  
55  
56  
57  
58  
59  
60

1  
2  
3  
4  
5  
6  
7  
8  
9  
10  
11  
12  
13  
14  
15  
16  
17  
18  
19  
20  
21  
22  
23  
24  
25  
26  
27  
28  
29  
30  
31  
32  
33  
34  
35  
36  
37  
38  
39  
40  
41  
42  
43  
44  
45  
46  
47  
48  
49  
50  
51  
52  
53  
54  
55  
56  
57  
58  
59  
60

**Trial Registration Number:** NCT02888262.

For peer review only

## Introduction

### Biomarkers in bipolar disorders

Bipolar disorder is a disabling mental illness with a lifetime prevalence of 1-2%, a high risk of recurrence of manic and depressive episodes, a lifelong elevated risk of suicide and a substantial heritability of 60-80% (1). Bipolar disorder is often conceptualised as a progressive disorder with increasing risk of recurrence for every new affective episode (2-5) and with increasing cognitive disabilities during the course of illness (6-9). Clinically, diagnostic boundaries between bipolar disorder and other psychiatric disorders such as unipolar disorder are unclear although some pharmacological and psychological treatment strategies differ substantially. Patients with bipolar disorder are often misdiagnosed as having from unipolar disorder, transient psychosis, reaction to stress/adjustment disorder or psychoactive substance abuse (10) and the mean delay between onset and diagnosis is 5-10 years (11). Although the risk of relapse of depression and mania is high it is for most patients impossible to predict and consequently prevent upcoming episodes in an individual tailored way. The identification of objective biomarkers as measures of pathophysiologic processes can both inform bipolar disorder diagnosis and provide biological targets for the development of new and personalized treatments (12). Accurate diagnosis of bipolar disorder in its early stages could help to prevent the long-term detrimental effects of the illness.

Recently, promising results have been presented regarding a diagnostic test for unipolar depression comprising levels of nine biomarkers in peripheral blood (13). Although the nature of bipolar disorder seems more biological driven than the nature of major depression with a higher heritability there has been no or few attempts to identify a similar composite biomarker for bipolar disorder.

### *Onset of illness and staging in bipolar disorder*

1  
2  
3  
4 Although the course of illness is heterogeneous there is a body of evidence for clinical progression  
5  
6 on average of unipolar and bipolar disorders as increasing number of affective episodes seem  
7  
8 associated with 1) increasing risk of recurrence 2) increasing duration of episodes 3) increasing  
9  
10 symptomatic severity of episodes 4) decreasing threshold for developing episodes 5) increasing risk  
11  
12 of developing dementia (9). It is likely that this clinical progression with deteriorating effects of  
13  
14 affective episodes and duration of illness is associated with neurobiological changes over the course  
15  
16 of illness. Unfortunately, results of all longitudinal studies on the biology of bipolar disorder are  
17  
18 hitherto hampered by three major limitations: 1) Only few studies have recruited patients with  
19  
20 bipolar illness from onset of the illness and most of these have used first onset mania as inclusion  
21  
22 criteria thereby excluding patients with a hypomanic episode (bipolar disorder, type II). As the  
23  
24 biology of bipolar disorder - based on cross-sectional studies - seem to change over the course of  
25  
26 illness from first episode to first relapse and recurrent relapses to an unremitting or rapid cycling  
27  
28 course (14-18), this is a major limitation in our knowledge internationally, 2) the number of patients  
29  
30 included in prior studies are less than 200, which is a limitation taking the heterogeneity of bipolar  
31  
32 disorder into account (e.g. bipolar disorder type I and II may have different biology, etc.), and 3) the  
33  
34 prospective follow-up period is less than a few years in all studies.  
35  
36  
37  
38

39  
40 In the BIO study we will establish a large cohort comprising of three sub cohorts that will be  
41  
42 followed long-term with systematic diagnostic, blood-based biomarkers, smartphone data, cognitive  
43  
44 and brain imaging assessment. The three sub cohort will consist of: 1) patients with newly  
45  
46 diagnosed/first episode bipolar disorder and 2) their healthy first-generation siblings and offspring  
47  
48 3) healthy individuals without a family history of affective disorder.  
49  
50

51  
52  
53 Overall aims:  
54  
55  
56  
57  
58  
59  
60

- 1  
2  
3  
4 1. To identify a composite blood-based biomarker measure as well as a composite electronic  
5  
6 smartphone-based biomarker from onset of bipolar disorder, during progression and in later  
7  
8 stages  
9
- 10  
11 2. To investigate if the composite blood-based biomarker measure and electronic smartphone-  
12  
13 based biomarker identified among patients with bipolar disorder predicts onset of illness  
14  
15 (depression or mania) among these patients healthy first-generation siblings and offspring  
16  
17
- 18 3. By applying an integrated systems approach, to identify patterns of “cerebral signatures”  
19  
20 across neuro circuitry and cognitive levels and to validate the composite blood-based  
21  
22 biomarker and electronic smartphone-based biomarkers against these bio-signatures  
23
- 24 4. To investigate long-term developmental trajectories in neurocognitive function and brain  
25  
26 imaging from the high risk state to onset of bipolar disorder following first relapse and  
27  
28 recurrent relapses and in the late stage with an unremitting, multi-episode or rapid cycling  
29  
30 course.  
31
- 32  
33 5. To investigate whether the course of illness is progressive on average in bipolar disorder and  
34  
35 to identify corresponding changes in biomarkers during the course of illness within BIO-1 to  
36  
37 BIO-4.  
38  
39  
40  
41

## 42 Methods and analysis

### 43 Overall methods

44  
45  
46 The BIO study is a long-term cohort study started April 2015 and planned to include 300 newly  
47  
48 diagnosed/first episode bipolar patients from the Copenhagen Affective Disorder Clinic, 200 of  
49  
50 these patients’ healthy first-generation relatives and 100 healthy individuals *without* a first-  
51  
52 generation family history of affective disorders.  
53  
54  
55  
56  
57  
58  
59  
60

1  
2  
3  
4 The Copenhagen Affective Disorder Clinic

5  
6 The Copenhagen Affective Disorder Clinic is a mood disorder clinic that provides treatment service  
7  
8 for patients with newly diagnosed/first episode bipolar disorder (19). The Copenhagen Affective  
9  
10 Disorder Clinic receives patients from the entire Capital Region of Denmark covering a catchment  
11  
12 area of 1.6 million people and all psychiatric centres in the region. All patients referred to the Clinic  
13  
14 as newly diagnosed/first episode patients, i.e., onset of first manic or hypomanic episode or when  
15  
16 the ICD-10 diagnosis of bipolar disorder is made for the first time, will routinely be asked for  
17  
18 inclusion in the BIO study.  
19  
20

21  
22  
23  
24 Recruitment of the three cohorts:

- 25  
26 1. 300 patients referred to the Copenhagen Affective Disorder Clinic (aged 15-70 years) as  
27  
28 newly diagnosed/first episode bipolar patients, i.e., onset of first manic or hypomanic  
29  
30 episode or when the diagnosis of bipolar disorder is made for the first time. The Clinic  
31  
32 receives more than 100 newly diagnosed/first episode bipolar patients each year and we  
33  
34 expect that nearly all will accept participation in the BIO study as this implies an extensive  
35  
36 clinical evaluation.  
37  
38  
39 2. 200 first-generation relatives (siblings and children aged 15 to 40 years) to the recruited  
40  
41 newly diagnosed/first episode bipolar patients.  
42  
43  
44 3. 100 age- and gender-matched healthy individuals *without* a first-generation family history of  
45  
46 affective disorders recruited among blood donors from the Blood Bank at Rigshospitalet,  
47  
48 Copenhagen, as in prior studies.  
49  
50

51  
52  
53 Diagnostic assessments at inclusion  
54  
55  
56  
57  
58  
59  
60

1  
2  
3  
4 The initial diagnostic assessment will be done using the Structured Clinical Interview for DSM-IV-  
5 TR Axis I Disorders (SCID (20)) categorizing patients in bipolar disorder type I or type II as part of  
6 daily praxis by the experienced specialists in psychiatry during the patients two year stay in the  
7  
8  
9  
10  
11  
12  
13  
14  
15  
16  
17  
18  
19  
20  
21  
22  
23  
24  
25  
26  
27  
28  
29  
30  
31  
32  
33  
34  
35  
36  
37  
38  
39  
40  
41  
42  
43  
44  
45  
46  
47  
48  
49  
50  
51  
52  
53  
54  
55  
56  
57  
58  
59  
60

The initial diagnostic assessment will be done using the Structured Clinical Interview for DSM-IV-TR Axis I Disorders (SCID (20)) categorizing patients in bipolar disorder type I or type II as part of daily praxis by the experienced specialists in psychiatry during the patients two year stay in the Copenhagen Affective Disorder Clinic. This clinical diagnosis of bipolar disorder will be confirmed in a semi-structured research based interview using the Schedules for Clinical Assessment in Neuropsychiatry (SCAN) providing an ICD-10 diagnosis (21).

#### Follow-up

Besides the assessments at inclusion, patients will be assessed during remitted, depressive and manic/mixed phases. Patients and healthy control individuals will be face to face assessed initially and at least every year during the first four years and after this, every second year for five years. As part of daily clinical praxis in Copenhagen Affective Disorder Clinic and as part of the BIO-2 sub-study all patients will get access to a smartphone app for electronic continuous monitoring of illness activity during a 5-year follow-up period (see sub-study BIO-2). Additionally, research assistants will contact all participants every third months to identify upcoming episodes / onset of illness and to ensure continued participation in the BIO study. At each assessment the present, clinical state (remission, manic, hypomanic, depressive, mixed episode) of all participants will be established according to ICD-10. The severity of depressive and manic symptoms (if present) will be assessed using the 17-item Hamilton Depression Rating Scale (HAMD-17) (22) and the Young Mania Rating Scale (YMRS) (23) with a time period of three days applied. Remission is defined as score of  $\leq 7$  on the HAMD-17 and the YMRS. In this way upcoming episodes and onset of illness (for healthy individuals) will be assessed with great certainty.



1  
2  
3  
4 Based on prior findings (2;3;19), it is estimated that patients will develop four to five affective  
5  
6 episodes on average during the follow-up period, i.e., relapse or recurrence, defined as above. It  
7  
8 estimated that 20-30% of the healthy first-generation relatives will develop onset of affective illness  
9  
10 compared to 2-5% among the healthy individuals *without* a first-generation family history of  
11  
12 affective disorders (24;25). Finally, linkage to Danish nation-wide register based data will be  
13  
14 included for all individuals on psychiatric hospitalisations, prescribed medication and  
15  
16 socioeconomic variables during the five years follow-up.  
17  
18  
19  
20  
21

## 22 Investigations

23  
24 We will include state of the art methods within clinical assessment as well as biomarkers including  
25  
26 a range of new methods:  
27

- 28 1. Clinical assessments using the Hamilton Depression Scale-17 items (HAMD-17) (22), the  
29 Young Mania Rating Scale (YMRS) (23), the Functional Assessment Short Test (FAST) (a  
30 measure of psychosocial function) (26)  
31  
32
- 33 2. Questionnaires including the Hypomania Check list (27), Standardized Assessment of  
34 Personality - Abbreviated Scale (SAPAS) (28), the WHO (Five) well-being index (29) and  
35 the Verona Satisfaction Scale-Affective Disorder (VSS-A) (30).  
36  
37
- 38 3. Standardised fasting blood tests for a large number of potential biomarkers (see later  
39 section: BIO-1, Biological tests).  
40  
41
- 42 4. Spot urine samples for oxidative generated damage to DNA and RNA  
43  
44
- 45 5. Hair cortisol as a valid and reliable index of long-term systemic cortisol levels (31)  
46  
47
- 48 6. Combined heart rate and movement sensor mounted at the thorax (Actiheart; (32;33)).  
49  
50
- 51 7. Daily electronic smartphone based self-monitoring of depressive and manic symptoms  
52  
53  
54  
55  
56  
57  
58  
59  
60

- 1
- 2
- 3
- 4 8. Daily electronic smartphone-based automatically generated data (e.g. data on phone usage,
- 5 social activity and physical activity)
- 6
- 7
- 8
- 9 9. Neuropsychological assessment (only during full or partial remission)
- 10
- 11 10. Structural magnetic resonance imaging (MRI) focusing on prefrontal cortex and
- 12 hippocampus as well as functional MRI (fMRI) (only during full or partial remission).
- 13
- 14
- 15
- 16
- 17
- 18
- 19
- 20
- 21
- 22
- 23
- 24
- 25
- 26
- 27
- 28
- 29
- 30
- 31
- 32
- 33
- 34
- 35
- 36
- 37
- 38
- 39
- 40
- 41
- 42
- 43
- 44
- 45
- 46
- 47
- 48
- 49
- 50
- 51
- 52
- 53
- 54
- 55
- 56
- 57
- 58
- 59
- 60

Clinical assessments will be performed by six PhD students (Master degree as a Medical Doctor or psychologist). They will be certified in a PhD training course in the SCAN interview and will be trained in using rating scales (HAM-D-21, YMRS, FAST). Inter-rater sessions supervised by senior clinicians from the Copenhagen Affective Disorder Clinic and senior researchers in the BIO study will be conducted among the researchers at regular time points during the entire study period.

The BIO study includes four separate but interacting sub-studies (BIO-1, BIO-2, BIO-3, BIO-4), as illustrated in Table 1 with specified aims, background and theoretical basis, and methods, as described in the following. Background and reasons for selection of putative biomarkers is an iterative process presented in each sub-study. Nevertheless, as the area of potential biomarkers is constantly evolving and as the sub-studies cover four different areas, the research protocol does not include systematic reviews of the literature.

### **BIO-1: peripheral blood-based biomarker in bipolar disorder**

#### Aims

To identify a composite blood-based biomarker that 1) discriminates bipolar disorder from healthy control individuals 2) discriminates between manic, depressive and remitted states 3) predicts

1  
2  
3  
4 emerging affective episodes, and 4) to validate the composite blood-based biomarker against the  
5  
6 Smartphone-based biomarker, and the neurocognitive and brain imaging signature, and 5) to  
7  
8 investigate the change in individual biomarkers as well as the composite blood-based biomarker  
9  
10 following onset of first manic episode, during successive relapses and in the end late stages of the  
11  
12 illness (15).  
13

### 14 15 16 17 Background and theoretical basis

18  
19 In a series of meta-analyses we concluded that although a number of candidate peripheral  
20  
21 biomarkers related to neuroplasticity, inflammation, oxidative stress and gene expression seem  
22  
23 promising, findings are limited by poor study designs, small cross sectional samples, lack of  
24  
25 adjustment for important confounders related to most peripheral biomarkers and poor laboratory  
26  
27 methodology (34-37). Because of high inter-individual variation in peripheral biomarkers,  
28  
29 assessment of intra-individual alterations from onset of illness through different affective phases  
30  
31 and into the late illness stage is necessary to identify clinically relevant and valid biomarkers,  
32  
33 necessitating a longitudinal study design (35;38).  
34  
35  
36

37 We have in two longitudinal studies with repeated assessments of patients with bipolar disorder  
38  
39 during affective states (manic/mixed, depressive and euthymic) and healthy control individuals  
40  
41 found that brain derived neurotrophic factor (BDNF) (39), increased oxidative DNA and RNA  
42  
43 damage (40;41) and decreased mRNA expression of the PTGDS gene encoding the prostaglandin D  
44  
45 synthase enzyme (42) are markers related to the illness trait in bipolar disorder. The level of the  
46  
47 cytokines IL-6 and IL-18 was related to manic episodes only and the activity of GSK-3beta varied  
48  
49 with affective states (43) suggesting that these may be state markers (44). These results have  
50  
51 contributed to the research area of biomarkers in bipolar disorder, moving the area closer towards  
52  
53 identifying clinically applicable biomarkers.  
54  
55  
56  
57  
58  
59  
60

1  
2  
3  
4 Nevertheless, it is unlikely, that one single biomarker will provide a useful diagnostic tool; instead a  
5  
6 composite of several relevant biomarkers appears a more viable approach (45). Recently promising  
7  
8 results have been presented regarding a diagnostic test in unipolar depression comprising serum  
9  
10 levels of nine individual biomarkers in peripheral blood (13). Similarly, preliminary studies have  
11  
12 suggested composite biomarkers for bipolar disorder (46-48). We identified a composite biomarker  
13  
14 consisting of gene expression from 19 candidate genes for bipolar disorder that accurately  
15  
16 discriminated bipolar patients from healthy control individuals (46). Thus, such approaches highly  
17  
18 increase the chances of obtaining a high specificity and sensitivity of the composite blood-based  
19  
20 biomarker (46-48).  
21  
22

23  
24 In order to establish relevant markers of risk and markers related to illness stage, it is necessary to  
25  
26 include assessment before onset of illness and during first- and recurrent relapses and in the late  
27  
28 stages of the illness according to the staging model of bipolar disorder (49). Further, the study of  
29  
30 early onset individuals is necessary to evaluate biomarker levels without influence from medication,  
31  
32 which may otherwise limit the validity of identified biomarkers.  
33  
34  
35  
36

### 37 Methods

38  
39 BIO-1 will include repeated clinical assessments and corresponding samples of blood and other  
40  
41 tissues among the 300 newly diagnosed/first episode bipolar patients, the 200 first-generation  
42  
43 relatives and the 100 healthy individuals *without* a first-generation family history of affective  
44  
45 disorder.  
46  
47

48 We will estimate a composite blood-based biomarker based on a number of individual markers  
49  
50 including brain-derived neurotrophic factor (BDNF), neurotrophin-3 (NT-3), 5 different cytokines,  
51  
52 gene expression, additional thirty candidate genes and other potential biomarkers (see Biological  
53  
54 tests), and identify the composite biomarker that correlates best with affective states and Hamilton  
55  
56  
57  
58  
59  
60

1  
2  
3  
4 Depression Rating Scale and Young Mania Rating Scale scores of depression and mania,  
5  
6 respectively. A final blood-based biomarker will be chosen based on its ability to 1) discriminate  
7  
8 patients with bipolar disorder from healthy control individuals and to 2) discriminate between  
9  
10 manic, depressive and remitted states in bipolar disorder.  
11  
12

### 13 14 15 Laboratory procedures

16  
17 We will obtain careful standardization of blood sampling and laboratory analysis by obtaining  
18  
19 blood samples in a fasting state and in a one hour interval in the morning. At the same day as blood  
20  
21 sampling, smoking status, alcohol use, BMI and menstrual cycle, etc., will be assessed. Blood  
22  
23 sampling and all phases of laboratory processing for plasma and DNA/RNA analyses will be done  
24  
25 at the Department of Clinical Biochemistry, Rigshospitalet using standard operational methods  
26  
27 conducted by a team of technicians blinded with respect to participant status. All plasma samples  
28  
29 will be stored at – 80 C. The BIO study will include a total of 2400 blood samples: 300 patients x 5  
30  
31 + 200 healthy first-generation relatives x 3 + 100 healthy participants without a first-generation  
32  
33 family history x 3.  
34  
35  
36  
37  
38  
39

### 40 Biological tests

41  
42 We will use a multianalyte panel including a large number of potential biomarkers such as plasma  
43  
44 levels of Neutrophins3, GSK-3,  $\beta$ -amyloid A $\beta$ 40 and A $\beta$ 42, BDNF, inflammatory markers, high  
45  
46 sensitive C-reactive protein, lipoproteins (VLDL, LDL, HDL) and specific apolipoproteins (e.g.  
47  
48 apoE, ApoA-I, apoA-II, and apoM) as potential markers of low-grade inflammation particularly  
49  
50 salient in the early stages of bipolar disorder. Total RNA, microRNA, genomic DNA and histones  
51  
52 are isolated from peripheral blood mononuclear cells. Gene expression and alternative slicing of  
53  
54 RNA transcripts are analysed using array reverse transcription quantitative real-time PCR (RT-  
55  
56  
57  
58  
59  
60

1  
2  
3  
4 qPCR) and next generation sequencing. Epigenetic modifications of the DNA (e.g. methylation) are  
5  
6 measured using antibody based methods or bisulphite treatments in combination with next  
7  
8 generation sequencing. The genomic positions of histones with specific modifications are detected  
9  
10 using immune precipitation and sequencing (CHIP-Seq). The degree of histone modifications is  
11  
12 measured by semi-quantitative antibody based detection.

13  
14 Measurements of DNA and RNA damage by oxidation are obtained from spot urine samples and  
15  
16 analyzed using ultra performance liquid chromatographic (UPLC) and mass spectrometry.  
17

18  
19 Hair cortisol will be included as a valid and reliable index of long-term systemic cortisol levels  
20  
21 (31).  
22

23  
24 We will report on these individual biological tests including comparing patients, first degree  
25  
26 relatives and healthy control individuals, when appropriate. The BIO study sample of 600  
27  
28 participants is rather small for genetic analyses discriminating patients with bipolar disorder from  
29  
30 healthy controls but some genetic analyses, including the CACNA1C gene, can be conducted in  
31  
32 cooperation with national and international genetic network groups.  
33  
34

### 35 36 37 Statistical analyses

38  
39 Data represent repeated measures within and between individuals and will be analysed using a  
40  
41 combination of generalized linear mixed models, integrated data analysis, and penalized regression  
42  
43 approaches to facilitate the combined feature selection and prediction of the available high-  
44  
45 dimensional data. Integrative data analysis ensures that we are able to identify an improved  
46  
47 composite blood-based biomarker since data from different molecular levels are combined in a  
48  
49 simultaneous analysis that closer resembles the biological system (50;51). Further, we will use cross  
50  
51 validation or alternatively split sample designs in the development and validation of the composite  
52  
53  
54  
55  
56  
57  
58  
59  
60

1  
2  
3  
4 biomarker. Finally, if possible we will evaluate the biomarker(s) in external non-Danish data sets in  
5  
6 collaboration with other international researchers.  
7

8  
9 A general principle that pertains to statistical analyses of all four sub-studies is the “intention to  
10  
11 treat” principle. Accordingly, participants who during follow-up get a diagnosis with a higher  
12  
13 diagnostic validity than bipolar disorder (i.e. a lower ICD-10 diagnostic number, DF00, DF10 and  
14  
15 DF20) that may substantially influence the biomarker measures are included in the analyses until  
16  
17 onset of symptoms from the disorder but excluded from subsequent analyses. These disorders  
18  
19 include significant neurological disorders such as dementia, stroke, brain tumour, multiple sclerosis,  
20  
21 Parkinson’s disease, as well as disorders due to significant psychoactive substance use and  
22  
23 schizophrenia“.  
24  
25

26  
27 Furthermore, in all four sub-studies, the problem of missing data will be alleviated by the use of mixed  
28  
29 effect model (for longitudinal measurements) and multiple imputations using chained equations  
30  
31 when applicable. If possible, joint modeling will be considered, depending on the missing  
32  
33 mechanism observed.  
34  
35  
36

### 37 Statistical power

38  
39 The study has a power of 80% to detect a minimum increment of 6.5 percentage points in sensitivity  
40  
41 if we assume that the existing diagnostic tools have a sensitivity of 70% to diagnose bipolar  
42  
43 disorder for a patient that has the disorder (see (52)). Thus, if the composite biomarker score  
44  
45 increases the sensitivity by a minimum of 6.5 percentage points then we have a power of 80% to  
46  
47 detect that increase based on 300 patients with bipolar disorder using a one-sided exact binomial  
48  
49 test (for fixed specificity).  
50  
51  
52  
53  
54

### 55 **BIO-2: Smartphone-based electronic biomarker in bipolar disorder**

### Aims

To identify a composite smartphone-based electronic biomarker that 1) discriminates patients with bipolar disorder from healthy control individuals 2) discriminates between manic, depressive and remitted states 3) predicts emerging affective episodes, and 4) to investigate the change in the composite smartphone-based biomarker following onset of first manic episode, during successive relapses and in the end stages of the illness as according to the staging system by Berk et al (15).

### Background and theoretical basis

Recently, electronic self-monitoring of the severity of depressive and manic symptoms using text messages has been suggested as an easy and inexpensive way to identify early signs of affective episodes, providing opportunities for mental health care providers to intervene shortly after prodromal symptoms first appear (53). We have, in the MONARCA project developed and tested a smartphone-based electronic monitoring system including daily subjective self-assessments of illness activity in bipolar disorder as well as a bi-directional feedback loop between the patient and clinicians (the MONARCA system (54-58)). Using the MONARCA system, fine-grained electronic data were collected during everyday life in naturalistic settings in patients with bipolar disorder. The MONARCA system was reported highly usable and useful by patients with bipolar disorder with a high self-assessment adherence (87-95%), and the patients reported that the MONARCA system helped them to better manage their disease (54;55). Further, the severity of depressive and manic symptoms was found to correlate with automatically generated smartphone data including 1) physical activity as reflected by the number of changes in cell tower ID per day (59), 2) social activity as reflected by the number of incoming and outgoing calls per day, the duration of incoming and outgoing calls per day, and the number of outgoing text messages per day (60), and 3) voice features collected during phone calls (61). Although these findings are encouraging there is a



1  
2  
3  
4 need to integrate self-monitored smartphone data with automatically generated smartphone data on  
5  
6 social and physical activity, speech and sleep into one composite smartphone generated electronic  
7  
8 biomarker measure. This composite measure should be modeled to 1) discriminate patients with  
9  
10 bipolar disorder from healthy control individuals 2) have a high correlation with depressive and  
11  
12 manic symptoms 3) discriminate between euthymic, manic and depressive states 4) early predict  
13  
14 emerging affective episodes for the individual patient to increase the possibility for early  
15  
16 intervention.

17  
18  
19 To validate smartphone based measures of physical activity and sleep, a subset of patients will wear  
20  
21 a combined heart rate and movement sensor mounted at the thorax that has been shown to correlate  
22  
23 with mood symptoms and affective states and differentiate between patients and controls (Actiheart;  
24  
25 (32;33)) like other wearable actigraphs (62-64).

### 26 27 28 29 30 31 Methods:

32  
33 All newly diagnosed/first episode patients will have access to a smartphone based system  
34  
35 (Monsenso that is a developed from the MONARCA system) for continuous self-monitoring as well  
36  
37 as fine-grained automatically monitoring of behavioural activity and early identification of  
38  
39 emerging affective episodes during the first two years and following relapse of episodes during a 5-  
40  
41 year follow-up period.

42  
43 Data analyses: In contrast to data in BIO-1, data in BIO-2 represent big data collected on a *daily* basis  
44  
45 within individuals. We will use hierarchical Bayesian predictive models that can handle big data through  
46  
47 sampling and visualization techniques that summarize data.  
48  
49

### 50 51 52 **BIO-3: neurocognitive and brain imaging signatures in bipolar disorder**

#### 53 54 55 Aims

56  
57  
58  
59  
60

1  
2  
3  
4 1) To identify an integrated brain-based biomarker of bipolar disorder including neurocognitive and  
5  
6 neuroimaging measures tapping into ‘hot’ (i.e. emotion-laden) and ‘cold’ (non-emotional)  
7  
8 cognition, 2) to examine whether the degree of abnormality in these measures predicts illness  
9  
10 onset in the high-risk group and/or relapse in the patient group, 3) to identify developmental  
11  
12 trajectories in ‘hot’ and ‘cold’ cognitive dysfunction and to identify structural and functional MRI  
13  
14 correlates in bipolar disorder via longitudinal assessments of high-risk individuals to remission after  
15  
16 onset of first manic episode and following successive relapses, and 4) to identify associations  
17  
18 between aberrant ‘hot’ and ‘cold’ neurocognitive function, structural and functional brain changes  
19  
20 and the composite blood-based and Smartphone-based biomarkers. Such ‘integrated systems  
21  
22 approach’ involving identification of patterns of biomarkers (bio-signatures) across these multiple  
23  
24 levels of investigation is considered imperative for deeper understanding of the dimensions of  
25  
26 underlying pathophysiological processes in bipolar disorder (12).  
27  
28  
29  
30  
31  
32

### 33 Background and theoretical basis

34  
35 Results from a number of meta-analyses of a large number of cross sectional studies of patients with  
36  
37 bipolar disorder in remission suggest trait-related ‘cold’ cognitive deficits in attention/processing  
38  
39 speed, memory, and executive function compared to healthy controls (65-68) that correlate with  
40  
41 everyday functioning (69). Cross-sectional comparison of patients at different illness stages  
42  
43 revealed more pronounced cognitive deficits during late compared with early stages in line with the  
44  
45 staging hypothesis of bipolar disorder (70). However, there are only a few longitudinal studies of  
46  
47 neuropsychological functioning with small sample sizes (12 studies including a total of 152 bipolar  
48  
49 patients (71)). A meta-analysis of these studies found no support for a progressive nature of  
50  
51 cognitive deficits (71). However, results from these studies are hampered by a number of limitations  
52  
53 including small sample sizes, short follow-up (mean follow-up period of 4.6 years) and high  
54  
55  
56  
57  
58  
59  
60

1  
2  
3  
4 attrition rates (up to 45%) (71). Consequently, it is unclear whether cognitive function assessed with  
5  
6 neuropsychological tests deteriorate with the number and duration of illness episodes in bipolar  
7  
8 disorder although epidemiological studies consistently revealed increased risk of developing  
9  
10 dementia long-term (6;8;72-74) and there is some evidence for increasing risk of dementia with  
11  
12 the number of episodes (7) (see also (9)).

13  
14 Deficits in 'hot' cognition are closely linked to emotional disturbances (75) and difficulties in socio-  
15  
16 emotional behaviour and interpersonal relations in bipolar disorder (76). 'Hot' cognition  
17  
18 abnormalities in bipolar disorder have been observed within three domains; (i) emotional  
19  
20 processing, (ii) reward processing and (iii) emotion regulation (reviews in (77;78)).

21  
22 Results from a large number of cross sectional structural imaging studies suggest that patients also  
23  
24 show increased lateral ventricular volumes and greater prevalence of white matter hyper-intensities  
25  
26 (79). While these findings are rather unspecific, studies also suggest that treatment with lithium  
27  
28 increases the grey matter volume of prefrontal cortex, amygdala and hippocampus (79). In addition,  
29  
30 a number of functional imaging studies suggest that bipolar disorder is associated with  
31  
32 abnormalities within fronto-limbic-subcortical structures (38).

33  
34 As long-term, integrative studies are lacking, it is unclear how neurocognitive and brain imaging  
35  
36 abnormalities correlate with the staging of bipolar disorder, illness progression and treatment  
37  
38 (38;80) or with changes in biological markers such as neurotropic, inflammatory and oxidative  
39  
40 stress markers (81;82).  
41  
42  
43  
44  
45  
46  
47

#### 48 Methods

49  
50 Using a comprehensive neurocognitive test battery, we will assess all participants from the three  
51  
52 groups (patients with bipolar disorder, first-generation relatives, and healthy individuals *without* a  
53  
54 family history of affective disorders). Patients will be followed from first onset of affective disorder  
55  
56  
57  
58  
59  
60

1  
2  
3  
4 and during successive periods of remission or at an annual basis (bipolar patients with no relapse,  
5  
6 first-generation relatives with no onset, and healthy controls. Among these, a subgroup of 60  
7  
8 patients, 60 healthy relatives (UR) and 30 healthy without a family history of affective disorders  
9  
10 (HC) will be undergo functional and structural MRI at these time points  
11  
12  
13

#### 14 Neurocognitive testing

15  
16  
17 Within ‘cold’ cognition verbal learning/memory and executive function have been highlighted as  
18  
19 the most suitable candidates for biomarkers of bipolar disorder (83;84). ‘Cold’ cognition will  
20  
21 therefore be assessed with neurocognitive tests probing verbal memory, attention and executive  
22  
23 function including the Rey Auditory Verbal Learning Test (RAVLT; (85;86)) and the WAIS-III  
24  
25 letter-number sequencing, RBANS digit span, n-back working memory, verbal fluency and Trail  
26  
27 Making Test B. Verbal intelligence will be estimated with the Danish Adult Reading Test (DART).  
28  
29 ‘Hot’ cognition will be assessed with a comprehensive battery of computerized neurocognitive tests  
30  
31 outside the scanner probing (i) emotional processing (ii) reward processing and (iii) emotion  
32  
33 regulation. These include the facial expression recognition and faces dot-probe tasks from the  
34  
35 Emotional Test Battery (ETB) (P1Vital, Oxford), and an ecologically valid social scenarios test  
36  
37 developed by our group (87). During fMRI we will also administer the following experimental  
38  
39 paradigms: an emotional face processing task using face stimuli from the Nimstim  
40  
41 (<http://www.macbrain.org/resources.htm>), a monetary reward processing task (88), and (iii) a  
42  
43 negative affective picture task using validated stimuli sets from the International Affective Picture  
44  
45 System (IAPS) developed in collaboration with researchers at the Universities of Chicago. In  
46  
47 addition, we will explore the neuronal basis for ‘cold’ cognition (executive function) using n-back  
48  
49 working memory and picture encoding tasks programmed in house (89). Finally, self-report  
50  
51  
52  
53  
54  
55  
56  
57  
58  
59  
60

1  
2  
3  
4 measures (BIS/BAS, and the CERQ (90)) are used to assess reward responsiveness and habitual  
5  
6 emotional regulation strategies.  
7  
8  
9

### 10 11 12 13 Structural and functional MRI

14  
15 Structural MRI: using T1-weighted images acquired at a 3T Siemens scanner at the Copenhagen  
16  
17 University Hospital, Rigshospitalet, we will focus on lateral ventricular volumes, grey matter  
18  
19 volume of prefrontal cortex, amygdala and hippocampus, relative to whole brain volume.  
20

21  
22 Specifically, segmentation and analysis of subcortical and regional cortical volume, shape and grey  
23  
24 matter density will be conducted FMRIB Software Library (FSL) tools, including the FMRIB's  
25  
26 Integrated Registration and Segmentation Tool (FIRST), the FSL-VBM tool and FSL vertex (shape)  
27  
28 analysis (<http://fsl.fmrib.ox.ac.uk/>).  
29

30  
31 Functional MRI (fMRI): T2-weighted images will be acquired to investigate white matter hyper-  
32  
33 intensities. We will also use fMRI to investigate neuronal underpinnings of 'hot' and 'cold'  
34  
35 cognition with the previously described experimental paradigms. Functional MRI data processing  
36  
37 will be carried out with the FMRI Expert Analysis Tool, part of FMRIB's Software Library  
38  
39 ([www.fmrib.ox.ac.uk/fsl](http://www.fmrib.ox.ac.uk/fsl)). We will examine mean percent BOLD signal change within predefined  
40  
41 hippocampal and amygdala Regions of Interest (ROIs) obtained in standard space with mri3dX  
42  
43 (<http://www.idoimaging.com/program/160>). In addition, whole-brain exploratory analysis will be  
44  
45 conducted to explore neural activity differences in other cortical regions. For this group analysis,  
46  
47 individual contrasts of interest will be included in separate general linear models with  
48  
49 nonparametric permutation inference (n = 5000) using the 'randomize' algorithm implemented in  
50  
51 FSL (91).  
52  
53  
54  
55  
56  
57  
58  
59  
60

## Statistical power

The above sample size for participants undergoing fMRI assessments is determined based on our previous fMRI studies. In particular, inclusion of about 17-22 participants per treatment/diagnostic group (matched for age and gender) had a power of >0.8 to detect differences between groups in neural and cognitive response to emotional faces (e.g. (92;93) and Miskowiak et al, under review) at an alpha-level of  $p < 0.05$  for cross-sectional designs. For longitudinal designs, we were able to demonstrate differences between groups in *the change* in task-related neural activity and in hippocampal structure with a sample of about 40 participants per group (94-96). Given this, our inclusion of 60 participants per group is expected to ensure adequate statistical power for both the cross-sectional and longitudinal parts of the fMRI study.

## **BIO-4: at risk or prodromal phase for bipolar disorder**

### Aims

To test whether 1) the composite blood-based biomarker, 2) the composite electronic smartphone-based biomarker and 3) the neurocognitive signature for bipolar disorder predict onset of illness (depression or mania) among a healthy (i.e., non-syndromal level) high risk population of first degree siblings and offspring to the patients with newly diagnosed/first episode mania/bipolar disorder, included in BIO-1, BIO-2 and BIO-3.

Background and theoretical basis: First-generation relatives to patients with bipolar disorder have a nine-fold increased risk of developing bipolar disorder and a two to three-fold increased risk of developing unipolar disorder (1). Although there is a great need for early detection and primary prevention of onset of illness among relatives to patients with bipolar disorder recent prior attempts have not been successful due to retrospective designs, poor characterisation of high risk individuals

1  
2  
3  
4 and small sample sizes (97). This is the first time a composite blood-based, a composite  
5  
6 smartphone-based and a composite neurocognitive biomarker identified among patients with bipolar  
7  
8 disorder will be investigated among their healthy relatives as a predictor measure of onset of illness  
9  
10 (18). This approach increases the chances of obtaining a high specificity and sensitivity of the  
11  
12 composite biomarkers.  
13

### 14 15 16 17 Methods

18  
19 This BIO-4 includes first-generation relatives (siblings and offspring aged 15 to 40 years) to the  
20  
21 recruited patients with first manic or bipolar diagnosis. All recruited patients will be asked about the  
22  
23 lifetime psychiatric history of first-degree relatives (their biological parents, siblings and offspring)  
24  
25 based on the Brief Screening for Family Psychiatric History questionnaire described by Weissmann  
26  
27 and colleagues (98). We expect that at least 200 first-generation relatives will be asymptomatic or  
28  
29 present mild symptoms or prodromal patterns to affective disorders and will be included in the study.  
30  
31 Biological tissues will be drawn (as part of BIO-1) and neurocognitive function will be assessed on  
32  
33 all individuals and brain imaging will be done on 60 individuals with longitudinal assessments.  
34  
35

### 36 37 Statistical analyses

38  
39 BIO4 will use a combination of penalized regression techniques, and random forests to infer the  
40  
41 importance of the original and combined markers and to compare the similarity of prediction error  
42  
43 from the models with and without combining the markers.  
44  
45  
46  
47  
48  
49  
50  
51

### 52 Feasibility

53  
54 The BIO study is fully feasible as patients are recruited as part of daily health care for patients  
55  
56 referred to the Copenhagen Affective Disorder Clinic.  
57  
58  
59  
60

## Ethical considerations

The BIO study has been approved by the Local Ethical Committee (H-7-2014-007) and the data agency, Capital Region of Copenhagen (RHP-2015-023). According to these specifications, adolescents aged 15-18 years will be invited only if parents have given consent. Data will be saved, encrypted and assessed according to the regulations from the Capital Region of Denmark. The study complies with the Declaration of Helsinki principles (Seoul, October 2008).

## Dissemination

Study results will be presented in peer reviewed journals and at international conferences in accordance with relevant reporting guidelines (99;100).

## Discussion

### Summary

It is expected that the BIO cohort will provide valid biological, electronic, neurocognitive and neuroimaging data and for the first time longitudinally identify changes in biomarkers during different stages of bipolar illness, i.e., at risk stage, following onset, during first relapse and recurrent relapses and in the late stages of the illness as according to Berk et al (15).

### Limitations

Some limitations of the BIO study should be noted beforehand. First, the rather extensive initial assessment study procedure may potentially result in selection of participants that are intrinsically



1  
2  
3  
4 positive towards clinical research and readily willing to cooperate. Nevertheless, we expect that  
5  
6 such selection will be decreased as it is likely that the vast majority of the more than 100 newly  
7  
8 diagnosed/first episode bipolar patients referred to the Copenhagen Affective Disorder Clinic each  
9  
10 year will accept participation in the BIO study as this implies an extensive clinical evaluation.  
11  
12 Second, attrition may increase during long-term follow-up and patients who stay in the study may  
13  
14 adhere more to treatment in general. Such selection is inherent in clinical longitudinal research, and  
15  
16 the large number of participants that will be included will increase external validity. Third, potential  
17  
18 confounding effects of psychotropic medication may influence comparisons between patients with  
19  
20 bipolar disorder and healthy control individuals as well as comparisons within patients as the vast  
21  
22 majority of patients will get medication that may change during the course of illness. Lithium,  
23  
24 mood stabilizers and antipsychotics may have effects on the collected biological, smartphone-based,  
25  
26 neuropsychological and brain imaging data. Effects of medication on biological measures are not  
27  
28 clear (101) although analyses from systematic reviews and meta-analyses involving only bipolar  
29  
30 disorder patients have not found clear effects of medication on cytokines (34;35), BDNF (37), gene  
31  
32 expression (36) nor has subsequent individual studies on cytokines (44;102), BDNF (39;102), gene  
33  
34 expression (46) or DNA and RNA damage (40;41). Effects of medication on electronic smartphone  
35  
36 generated data as well as on neuropsychological and brain imaging data are poorly investigated and  
37  
38 warrants further studies (103).  
39  
40  
41  
42  
43  
44  
45

46 Fourth, due to the large number of biological and statistical tests included in the BIO study, chance  
47  
48 findings may occur in relation to the individual biological test. However, the aim of the BIO study  
49  
50 is to identify a composite biomarker measure related to bipolar illness, depression and mania using  
51  
52 cross validation or alternatively split sample designs in the development and validation of the  
53  
54 composite biomarker.  
55  
56  
57  
58  
59  
60

1  
2  
3  
4  
5  
6  
7  
8  
9 Finally, the BIO study does not include (randomised) interventions limiting casual interpretations of  
10 the results. Nevertheless, with the BIO prospective, repeated measures design it is possible to  
11 identify valid associations between the composite measures (of biological, electrical,  
12 neuropsychological and brain imaging data) and depressive and manic symptoms and states.  
13  
14  
15  
16  
17  
18

### 19 Strengths

20  
21 The BIO study is the first study aiming to identify 1) a composite blood-based biomarker, 2) a  
22 composite electronic smartphone-based biomarker and 3) a neurocognitive signature for bipolar  
23 disorder as well as to measure the same biomarkers in newly diagnosed/first episode bipolar  
24 patients and their healthy first-generation relatives. It is possible to recruit newly diagnosed/first  
25 episode patients with mania/bipolar as all such patients from the entire Capital Region of Denmark  
26 are referred to the Copenhagen Affective Disorder Clinic and routinely asked for inclusion in the  
27 BIO study. Long-term attrition is supposed to be low as all patients will be followed by the  
28 Copenhagen Affective Disorder Clinic for the first two years and subsequently in other treatment  
29 settings in the Capital Region of Denmark. Including longitudinal assessment of healthy individuals  
30 is of paramount importance to control for the effect of timing and ageing (104), but among all  
31 studies on biomarkers in bipolar disorder, this has been done only in two studies from our group  
32 (40;44). The study will be performed by an experienced international research group, combining  
33 expertise from all areas of the study.  
34  
35  
36  
37  
38  
39  
40  
41  
42  
43  
44  
45  
46  
47  
48  
49  
50  
51  
52

### 53 Conclusion

54  
55  
56  
57  
58  
59  
60

1  
2  
3  
4 The BIO study is a large long-term cohort study on biomarkers in bipolar disorder and we expect  
5  
6 that the findings for the first time will be representative of biomarkers in bipolar disorder in general  
7  
8 as no prior study on newly diagnosed/first episode bipolar disorder has been conducted. It is  
9  
10 expected that the BIO cohort will provide valid biological, electronically, neuropsychological and  
11  
12 brain imaging longitudinal data.  
13  
14  
15  
16  
17  
18  
19  
20

#### 21 Authors' contribution

22 LVK designed the study together with MV, KM, KWM and MFJ. LVK drafted the study protocol  
23 and the manuscript. All authors contributed to development of the study protocol and to editing the  
24 manuscript and read and approved the final version.

25 KM, LBN, RFS, CE, BKP, HEP, RSM, FK, WFG, and MV contributed specifically to BIO-1 on  
26 peripheral blood-based biomarkers. MFJ, OW, JB, MF and OM contributed specifically to BIO-2  
27 on smartphone-based electronic biomarkers. KWM, GMK and MP contributed specifically to BIO-  
28 3 on neurocognitive and brain imaging signatures. MV contributed specifically to BIO-4 on at risk  
29 or prodromal phase of bipolar disorder (in addition to BIO-1).  
30  
31  
32

#### 33 Funding

34 The study is funded by grants from the Mental Health Services, Capital Region of Denmark, The  
35 Danish Council for Independent Research, Medical Sciences (DFF – 4183-00570), Weimans Fund,  
36 Markedmodningsfonden (the Market Development Fund, (2015-310), Gangstedfonden (A29594),  
37 Helsefonden (16-B-0063), Innovation Fund Denmark (the Innovation Fund, Denmark, 5164-  
38 00001B), Copenhagen Center for Health Technology (CACHET), EU H2020 ITN (EU project  
39 722561), Augustinusfonden (16-0083), Lundbeck foundation (R215-2015-4121).  
40  
41

#### 42 Competing interests

43 LVK has within the preceding three years been a consultant for Lundbeck, AstraZeneca and  
44 Sunovion. KWM has received consultancy fees in the past three years from Lundbeck and Allergan.  
45 MFJ has been a consultant for Eli Lilly and Lundbeck. MV has within the preceding three years  
46 been a consultant for Astra Zeneca and Servier. FK has been a speaker for Ache, Daiichi Sankyo  
47 and Janssen. MP is a consultant for Roche Pharmaceuticals.

48 RSM: Advisory Boards: Lundbeck, Pfizer, AstraZeneca, Elli-Lilly, Janssen, Ortho Purdue, Johnson  
49 & Johnson, Moksha8, Sunovion, Mitsubishi, Takeda, Forest, Otsuka, Bristol-Myers Squibb, Shire,  
50 Speakers Fees: Lundbeck, Pfizer, AstraZeneca, Elli-Lilly, JanssenOrtho, Purdue, Johnson &  
51 Johnson, Moksha8, Sunovion, Mitsubishi, Takeda, Forest, Otsuka, Bristol-Myers Squibb, Shire,  
52 Research Grants: Lundbeck, JanssenOrtho, Shire, Purdue, AstraZeneca, Pfizer, Otsuka, Allergan.  
53 HEP has received a research Grant from Boeringer Ingelheim. GMK has received honoraria as  
54 Field Editor of the International Journal of Neuropsychopharmacology and as scientific advisor for  
55 H Lundbeck A/S. JEB and MF are co-founders and shareholders in Monsenso.  
56  
57  
58  
59  
60

1  
2  
3  
4 LBN, RFS and WFG declare no competing interests.  
5

6 The validity of the research cannot be influenced by any of these potential secondary interest (such  
7 as financial gain or personal relationship).  
8

9  
10 Patient consent  
11 Obtained

12  
13 Ethical approval  
14 The study has been approved by the Local Ethical Committee (H-7-2014-007) and the data agency,  
15 Capital Region of Copenhagen (RHP-2015-023).  
16

17  
18 Study registration  
19 The BIO study has been registered at clinicaltrials.gov with Trial Registration Number:  
20 NCT02888262.  
21  
22  
23  
24  
25  
26  
27  
28  
29  
30  
31  
32  
33  
34  
35  
36  
37  
38  
39  
40  
41  
42  
43  
44  
45  
46  
47  
48  
49  
50  
51  
52  
53  
54  
55  
56  
57  
58  
59  
60

Table 1. Overview of the longitudinal assessments during risk periods and following onset of bipolar disorder in the four sub-studies of the BIO study.

| Course | Healthy first-gen. relatives | First episode | Remission | First relapse | Remission | Second relapse | Etc. |
|--------|------------------------------|---------------|-----------|---------------|-----------|----------------|------|
| BIO-1  | x                            | x             | x         | x             | x         | x              | x    |
| BIO-2  | x                            | x             | x         | x             | x         | x              | x    |
| BIO-3  | x                            |               | x         |               | x         |                | x    |
| BIO-4  | x                            | x             | x         | x             | x         | x              | x    |

BIO-1: Peripheral blood-based biomarker in bipolar disorder

BIO-2: Smartphone-based electronic biomarker in bipolar disorder

BIO-3: Neurocognitive and brain imaging signatures in bipolar disorder

BIO-4: At risk or prodromal phase for bipolar disorder

## Reference List

1. Lohoff FW, Berettini WH. Genetics of bipolar disorder. In: Yatham LN, Maj M, eds. *Bipolar disorder: Clinical and neurobiological foundations*. Singapore: Wiley-Blackwell 2010:110-23.
2. Kessing LV, Hansen MG, Andersen PK, Angst J. The predictive effect of episodes on the risk of recurrence in depressive and bipolar disorders - a life-long perspective. *Acta Psychiatr Scand* 2004;109:339-44.
3. Kessing LV, Hansen MG, Andersen PK. Course of illness in depressive and bipolar disorders. Naturalistic study, 1994-1999. *Br J Psychiatry* 2004;185:372-7.
4. Post RM, Fleming J, Kapczinski F. Neurobiological correlates of illness progression in the recurrent affective disorders. *J Psychiatr Res* 2012.
5. Schneider MR, DelBello MP, McNamara RK, Strakowski SM, Adler CM. Neuroprogression in bipolar disorder. *Bipolar Disord* 2012;14:356-74.
6. Kessing LV, Nilsson FM. Increased risk of developing dementia in patients with major affective disorders compared to patients with other medical illnesses. *J Affect Disord* 2003;73:261-9.
7. Kessing LV, Andersen PK. Does the risk of developing dementia increase with the number of episodes in patients with depressive disorder and in patients with bipolar disorder? *J Neurol Neurosurg Psychiatry* 2004;75:1662-6.
8. da SJ, Goncalves-Pereira M, Xavier M, Mukaetova-Ladinska EB. Affective disorders and risk of developing dementia: systematic review. *Br J Psychiatry* 2013;202:177-86.
9. Kessing LV, Andersen PK. Evidence for clinical progression of unipolar and bipolar disorders. *Acta Psychiatr.Scand.* 2016 (in press).
10. Kessing LV. Diagnostic stability in bipolar disorder in clinical practise as according to ICD-10. *J Affect Disord* 2005;85:293-9.
11. Baldessarini RJ, Tondo L, Baethge CJ, Lepri B, Bratti IM. Effects of treatment latency on response to maintenance treatment in manic-depressive disorders. *Bipolar Disord* 2007;9:386-93.
12. Phillips ML, Kupfer DJ. Bipolar disorder diagnosis: challenges and future directions. *Lancet* 2013;381:1663-71.
13. Papakostas GI, Shelton RC, Kinrys G et al. Assessment of a multi-assay, serum-based biological diagnostic test for major depressive disorder: a pilot and replication study. *Mol Psychiatry* 2013;18:332-9.
14. Fries GR, Pfaffenseller B, Stertz L et al. Staging and neuroprogression in bipolar disorder. *Curr Psychiatry Rep* 2012;14:667-75.

15. Berk M, Berk L, Dodd S et al. Stage managing bipolar disorder. *Bipolar Disord* 2013.
16. McIntyre RS. Predicting and preventing bipolar disorder: the need to fundamentally advance the strategic approach. *Bipolar Disorder*. 2014 (in press).
17. Grande I, Magalhaes PV, Chendo I et al. Staging bipolar disorder: clinical, biochemical, and functional correlates. *Acta Psychiatr Scand* 2014;129:437-44.
18. Kapczinski F, Magalhaes PV, Balanza-Martinez V et al. Staging systems in bipolar disorder: an International Society for Bipolar Disorders Task Force Report. *Acta Psychiatr Scand* 2014.
19. Kessing LV, Hansen HV, Hvenegaard A et al. Treatment in a specialised out-patient mood disorder clinic v. standard out-patient treatment in the early course of bipolar disorder: randomised clinical trial. *Br J Psychiatry* 2013;202:212-9.
20. First MB, Spitzer M, Gibbon M, Williams JB. Structured Clinical Interview for DSM-IV-TR Axis I Disorders. New York: Biometrics Research Department, New York State Psychiatric Institute, New York., 2002.
21. Wing JK, Babor T, Brugha T et al. SCAN. Schedules for Clinical Assessment in Neuropsychiatry. *Arch Gen Psychiatry* 1990;47:589-93.
22. Hamilton M. A rating scale for depression. *J Neurol Neurosurg Psychiatry* 1960;23:56-62.
23. Young RC, Biggs JT, Ziegler VE, Meyer DA. A rating scale for mania: reliability, validity and sensitivity. *Br J Psychiatry* 1978;133:429-35.
24. Vinberg M, Miskowiak K, Kessing LV. Risk markers for affective disorder, a seven-years follow up study of a twin cohort at low and high risk for affective disorder. *J Psychiatr Res* 2013;47:565-71.
25. Hillegers MH, Reichart CG, Wals M, Verhulst FC, Ormel J, Nolen WA. Five-year prospective outcome of psychopathology in the adolescent offspring of bipolar parents. *Bipolar Disord* 2005;7:344-50.
26. Rosa AR, Sanchez-Moreno J, Martinez-Aran A et al. Validity and reliability of the Functioning Assessment Short Test (FAST) in bipolar disorder. *Clin Pract Epidemiol Ment Health* 2007;3:5.
27. Angst J, Adolfsson R, Benazzi F et al. The HCL-32: towards a self-assessment tool for hypomanic symptoms in outpatients. *J Affect Disord* 2005;88:217-33.
28. Bukh JD, Bock C, Vinberg M, Gether U, Kessing LV. Clinical utility of Standardised Assessment of Personality - Abbreviated Scale (SAPAS) among patients with first episode depression. *J Affect Disord* 2010;127:199-202.
29. Bech P, Olsen LR, Kjoller M, Rasmussen NK. Measuring well-being rather than the absence of distress symptoms: a comparison of the SF-36 Mental Health subscale and the WHO-Five Well-Being Scale. *Int J Methods Psychiatr Res* 2003;12:85-91.



- 1
- 2
- 3
- 4 30. Kessing LV, Hansen HV, Ruggeri M, Bech P. Satisfaction with treatment among patients
- 5 with depressive and bipolar disorders. *Soc Psychiatry Psychiatr Epidemiol* 2006;41:148-55.
- 6
- 7 31. Stalder T, Kirschbaum C. Analysis of cortisol in hair--state of the art and future directions.
- 8 *Brain Behav Immun* 2012;26:1019-29.
- 9
- 10 32. Faurholt-Jepsen M, Brage S, Vinberg M et al. Differences in psychomotor activity in
- 11 patients suffering from unipolar and bipolar affective disorder in the remitted or
- 12 mild/moderate depressive state. *J Affect Disord* 2012;141:457-63.
- 13
- 14 33. Faurholt-Jepsen M, Brage S, Vinberg M, Kessing LV. State-related differences in the level
- 15 of psychomotor activity in patients with bipolar disorder - Continuous heart rate and
- 16 movement monitoring. *Psychiatry Res* 2016;237:166-74.
- 17
- 18 34. Munkholm K, Vinberg M, Kessing LV. Cytokines in bipolar disorder: a systematic review
- 19 and meta-analysis. *J Affect Disord* 2013;144:16-27.
- 20
- 21 35. Munkholm K, Brauner JV, Kessing LV, Vinberg M. Cytokines in bipolar disorder vs.
- 22 healthy control subjects: a systematic review and meta-analysis. *J Psychiatr Res*
- 23 2013;47:1119-33.
- 24
- 25 36. Munkholm K, Vinberg M, Berk M, Kessing LV. State-related alterations of gene expression
- 26 in bipolar disorder: a systematic review. *Bipolar Disord* 2012;14:684-96.
- 27
- 28 37. Munkholm K, Vinberg M, Kessing LV. Peripheral blood brain-derived neurotrophic factor
- 29 in bipolar disorder: a comprehensive systematic review and meta-analysis. *Mol Psychiatry*
- 30 2015.
- 31
- 32 38. Frey BN, Andreazza AC, Houenou J et al. Biomarkers in bipolar disorder: a positional paper
- 33 from the International Society for Bipolar Disorders Biomarkers Task Force. *Aust N Z J*
- 34 *Psychiatry* 2013;47:321-32.
- 35
- 36 39. Munkholm K, Pedersen BK, Kessing LV, Vinberg M. Elevated levels of plasma brain
- 37 derived neurotrophic factor in rapid cycling bipolar disorder patients.
- 38 *Psychoneuroendocrinology* 2014;47:199-211.
- 39
- 40 40. Jacoby AS, Vinberg M, Poulsen HE, Kessing LV, Munkholm K. Increased DNA and RNA
- 41 damage by oxidation in patients with bipolar I disorder. *Transl Psychiatry* 2016;6:e867.
- 42
- 43 41. Munkholm K, Poulsen HE, Kessing LV, Vinberg M. Elevated levels of urinary markers of
- 44 oxidatively generated DNA and RNA damage in bipolar disorder. *Bipolar Disord*
- 45 2015;17:257-68.
- 46
- 47 42. Munkholm K, Peijs L, Kessing LV, Vinberg M. Reduced mRNA expression of PTGDS in
- 48 peripheral blood mononuclear cells of rapid-cycling bipolar disorder patients compared with
- 49 healthy control subjects. *Int J Neuropsychopharmacol* 2015;18.
- 50
- 51 43. Jacoby AS, Munkholm K, Vinberg M et al. Glycogen synthase kinase-3beta in patients with
- 52 bipolar I disorder: results from a prospective study. *Bipolar Disord* 2016;18:334-41.
- 53
- 54
- 55
- 56
- 57
- 58
- 59
- 60



- 1
- 2
- 3
- 4 44. Munkholm K, Weikop P, Kessing LV, Vinberg M. Elevated levels of IL-6 and IL-18 in
- 5 manic and hypomanic states in rapid cycling bipolar disorder patients. *Brain Behav Immun*
- 6 2015;43:205-13.
- 7
- 8 45. Goldstein BI, Young LT. Toward clinically applicable biomarkers in bipolar disorder: focus
- 9 on BDNF, inflammatory markers, and endothelial function. *Curr Psychiatry Rep*
- 10 2013;15:425.
- 11
- 12 46. Munkholm K, Peijs L, Vinberg M, Kessing LV. A composite peripheral blood gene
- 13 expression measure as a potential diagnostic biomarker in bipolar disorder. *Transl*
- 14 *Psychiatry* 2015;5:e614.
- 15
- 16 47. Dickerson F, Schroeder J, Stallings C, Origoni A, Bahn S, Yolken R. Multianalyte markers
- 17 of schizophrenia and bipolar disorder: A preliminary study. *Schizophr Res* 2015;168:450-5.
- 18
- 19 48. Haenisch F, Cooper JD, Reif A et al. Towards a blood-based diagnostic panel for bipolar
- 20 disorder. *Brain Behav Immun* 2016;52:49-57.
- 21
- 22 49. Berk M, Conus P, Lucas N et al. Setting the stage: from prodrome to treatment resistance in
- 23 bipolar disorder. *Bipolar Disord* 2007;9:671-8.
- 24
- 25 50. Brink-Jensen K, Bak S, Jorgensen K, Ekstrom CT. Integrative analysis of metabolomics and
- 26 transcriptomics data: a unified model framework to identify underlying system pathways.
- 27 *PLoS One* 2013;8:e72116.
- 28
- 29 51. Hastie T, Tibshirani R, Friedman J. Penalised regression. *The Elements of Statistical*
- 30 *Learning: Data Mining, Inference, and Prediction, Second Edition.* Springer Verlag., 2009.
- 31
- 32 52. Phelps J, Ghaemi SN. The mistaken claim of bipolar 'overdiagnosis': solving the false
- 33 positives problem for DSM-5/ICD-11. *Acta Psychiatr Scand* 2012;126:395-401.
- 34
- 35 53. Bopp JM, Miklowitz DJ, Goodwin GM, Stevens W, Rendell JM, Geddes JR. The
- 36 longitudinal course of bipolar disorder as revealed through weekly text messaging: a
- 37 feasibility study. *Bipolar Disord* 2010;12:327-34.
- 38
- 39 54. Bardram, J. E., Frost, M., Szántó, K., Faurholt-Jepsen, M., Vinberg, M., and Kessing, L. V.
- 40 Designing Mobile Health Technology for Bipolar Disorder: A Field Trial of the
- 41 MONARCA System. *Proceedings of the SIGCHI Conference on Human Factors in*
- 42 *Computing Systems*, 2627-2636. 2013.
- 43
- 44 55. Faurholt-Jepsen M, Frost M, Ritz C et al. Daily electronic self-monitoring in bipolar
- 45 disorder using smartphones - the MONARCA I trial: a randomized, placebo-controlled,
- 46 single-blind, parallel group trial. *Psychol Med* 2015;1-14.
- 47
- 48 56. Frost, M., Doryab, A., Faurholt-Jepsen, M., Kessing, L. V., and Bardram, J. E. Supporting
- 49 disease insight through data analysis: refinements of the monarca self-assessment system.
- 50 20143. *Proceedings of the 2013 ACM international joint conference on Pervasive and*
- 51 *ubiquitous computing*, ACM Press, New York, NY, USA.
- 52
- 53
- 54
- 55
- 56
- 57
- 58
- 59
- 60

- 1  
2  
3  
4 57. Bardram, J. E., Frost, M., Szántó, , K., and Marcu, G. The MONARCA self-assessment  
5 system: a persuasive personal monitoring system for bipolar patients. In Proceedings of the  
6 2nd ACM SIGHIT International Health Informatics Symposium (IHI '12). ACM, New  
7 York, NY, USA, 21-30. DOI=<http://dx.doi.org/10.1145/2110363.2110370>. 2012.  
8  
9
- 10  
11 58. Gravenhorst F, Muaremi A, Bardram J et al. Mobile phones as medical devices in mental  
12 disorder treatment: an overview. *Journal of Ubiquitous Computing* 2015;19:335-53.  
13
- 14 59. Faurholt-Jepsen M, Frost M, Vinberg M, Christensen EM, Bardram JE, Kessing LV.  
15 Smartphone data as objective measures of bipolar disorder symptoms. *Psychiatry Res*  
16 2014;217:124-7.  
17
- 18 60. Faurholt-Jepsen M, Vinberg M, Frost M, Christensen EM, Bardram J, Kessing LV.  
19 Smartphone data as an electronic biomarker of illness activity in bipolar disorder. *Bipolar*  
20 *Disord* 2015;7:15-28.  
21
- 22 61. Faurholt-Jepsen M, Busk J, Frost M et al. Voice analysis as an objective state marker in  
23 bipolar disorder. *Transl Psychiatry* 2016;6:e856.  
24
- 25 62. Faedda GL, Ohashi K, Hernandez M et al. Actigraph measures discriminate pediatric  
26 bipolar disorder from attention-deficit/hyperactivity disorder and typically developing  
27 controls. *J Child Psychol Psychiatry* 2016;57:706-16.  
28
- 29 63. Indic P, Salvatore P, Maggini C et al. Scaling behavior of human locomotor activity  
30 amplitude: association with bipolar disorder. *PLoS One* 2011;6:e20650.  
31  
32
- 33 64. Valenza G, Nardelli M, Lanata A et al. Wearable monitoring for mood recognition in  
34 bipolar disorder based on history-dependent long-term heart rate variability analysis. *IEEE J*  
35 *Biomed Health Inform* 2014;18:1625-35.  
36
- 37 65. Torres IJ, Boudreau VG, Yatham LN. Neuropsychological functioning in euthymic bipolar  
38 disorder: a meta-analysis. *Acta Psychiatr Scand Suppl* 2007;17-26.  
39
- 40 66. Bora E, Yucel M, Pantelis C. Cognitive endophenotypes of bipolar disorder: a meta-analysis  
41 of neuropsychological deficits in euthymic patients and their first-degree relatives. *J Affect*  
42 *Disord* 2009;113:1-20.  
43  
44
- 45 67. Mann-Wrobel MC, Carreno JT, Dickinson D. Meta-analysis of neuropsychological  
46 functioning in euthymic bipolar disorder: an update and investigation of moderator  
47 variables. *Bipolar Disord* 2011;13:334-42.  
48
- 49 68. Bourne C, Aydemir O, Balanza-Martinez V et al. Neuropsychological testing of cognitive  
50 impairment in euthymic bipolar disorder: an individual patient data meta-analysis. *Acta*  
51 *Psychiatr Scand* 2013;128:149-62.  
52
- 53 69. Depp CA, Mausbach BT, Harmell AL et al. Meta-analysis of the association between  
54 cognitive abilities and everyday functioning in bipolar disorder. *Bipolar Disord*  
55 2012;14:217-26.  
56  
57  
58  
59  
60

- 1
- 2
- 3
- 4 70. Rosa AR, Magalhaes PV, Czepielewski L et al. Clinical staging in bipolar disorder: focus on
- 5 cognition and functioning. *J Clin Psychiatry* 2014;75:e450-e456.
- 6
- 7 71. Samame C, Martino DJ, Strejilevich SA. Longitudinal course of cognitive deficits in bipolar
- 8 disorder: a meta-analytic study. *J Affect Disord* 2014;164:130-8.
- 9
- 10 72. Kessing LV, Olsen EW, Mortensen PB, Andersen PK. Dementia in affective disorder: a
- 11 case-register study. *Acta Psychiatr Scand* 1999;100:176-85.
- 12
- 13 73. Wu KY, Chang CM, Liang HY et al. Increased risk of developing dementia in patients with
- 14 bipolar disorder: a nested matched case-control study. *Bipolar Disord* 2013;15:787-94.
- 15
- 16 74. Chen MH, Li CT, Tsai CF et al. Risk of subsequent dementia among patients with bipolar
- 17 disorder or major depression: a nationwide longitudinal study in Taiwan. *J Am Med Dir*
- 18 *Assoc* 2015;16:504-8.
- 19
- 20 75. Strakowski SM, Adler CM, Holland SK, Mills N, DelBello MP. A preliminary fMRI study
- 21 of sustained attention in euthymic, unmedicated bipolar disorder.
- 22 *Neuropsychopharmacology* 2004;29:1734-40.
- 23
- 24 76. Kerr N, Dunbar RI, Bentall RP. Theory of mind deficits in bipolar affective disorder. *J*
- 25 *Affect Disord* 2003;73:253-9.
- 26
- 27 77. Wessa M, Linke J. Emotional processing in bipolar disorder: behavioural and neuroimaging
- 28 findings. *Int Rev Psychiatry* 2009;21:357-67.
- 29
- 30 78. Phillips ML, Swartz HA. A Critical Appraisal of Neuroimaging Studies of Bipolar Disorder:
- 31 Toward a New Conceptualization of Underlying Neural Circuitry and a Road Map for
- 32 Future Research. *Am J Psychiatry* 2014.
- 33
- 34 79. Hallahan B, Newell J, Soares JC et al. Structural magnetic resonance imaging in bipolar
- 35 disorder: an international collaborative mega-analysis of individual adult patient data. *Biol*
- 36 *Psychiatry* 2011;69:326-35.
- 37
- 38 80. Mora E, Portella MJ, Forcada I, Vieta E, Mur M. Persistence of cognitive impairment and its
- 39 negative impact on psychosocial functioning in lithium-treated, euthymic bipolar patients: a
- 40 6-year follow-up study. *Psychol Med* 2013;43:1187-96.
- 41
- 42 81. Bauer IE, Pascoe MC, Wollenhaupt-Aguiar B, Kapczinski F, Soares JC. Inflammatory
- 43 mediators of cognitive impairment in bipolar disorder. *J Psychiatr Res* 2014.
- 44
- 45 82. Lim CS, Baldessarini RJ, Vieta E, Yucel M, Bora E, Sim K. Longitudinal neuroimaging and
- 46 neuropsychological changes in bipolar disorder patients: review of the evidence. *Neurosci*
- 47 *Biobehav Rev* 2013;37:418-35.
- 48
- 49 83. Balanza-Martinez V, Rubio C, Selva-Vera G et al. Neurocognitive endophenotypes
- 50 (endophenocognotypes) from studies of relatives of bipolar disorder subjects: a systematic
- 51 review. *Neurosci Biobehav Rev* 2008;32:1426-38.
- 52
- 53
- 54
- 55
- 56
- 57
- 58
- 59
- 60

- 1
- 2
- 3
- 4 84. Raust A, Daban C, Cochet B, Henry C, Bellivier F, Scott J. Neurocognitive performance as
- 5 an endophenotype for bipolar disorder. *Front Biosci (Elite Ed)* 2014;6:89-103.
- 6
- 7 85. Rey A. Psychological examination of traumatic encephalopathy. *Archives de*
- 8 *Psychologic* 1941;28:286-340.
- 9
- 10 86. Rey A. *L'examen clinique en psychologie [Clinical tests in psychology]*. Paris.:  
11 Presses Universitaires de France., 1964.
- 12
- 13 87. Kjaerstad HL, Vinberg M, Goldin PR et al. Impaired down-regulation of negative emotion  
14 in self-referent social situations in bipolar disorder: A pilot study of a novel experimental  
15 paradigm. *Psychiatry Res* 2016;238:318-25.
- 16
- 17 88. Chase HW, Nusslock R, Almeida JR, Forbes EE, LaBarbara EJ, Phillips ML. Dissociable  
18 patterns of abnormal frontal cortical activation during anticipation of an uncertain reward or  
19 loss in bipolar versus major depression. *Bipolar Disord* 2013;15:839-54.
- 20
- 21 89. Miskowiak K, O'Sullivan U, Harmer CJ. Erythropoietin enhances hippocampal response  
22 during memory retrieval in humans. *J Neurosci* 2007;27:2788-92.
- 23
- 24 90. Garnefski N, Kraaij V, SP. Negative life events, cognitive emotion regulation and  
25 emotional problems. *Pers Individ Differ* 2001;30:1311-27.
- 26
- 27 91. Winkler AM, Ridgway GR, Webster MA, Smith SM, Nichols TE. Permutation inference for  
28 the general linear model. *Neuroimage* 2014;92:381-97.
- 29
- 30 92. Miskowiak K, O'Sullivan U, Harmer CJ. Erythropoietin reduces neural and cognitive  
31 processing of fear in human models of antidepressant drug action. *Biol Psychiatry*  
32 2007;62:1244-50.
- 33
- 34 93. Miskowiak K, Glerup L, Vestbo C et al. Different neural and cognitive response to  
35 emotional faces in healthy monozygotic twins at risk of depression. *Psychological Medicine*  
36 2015;45:1447-58.
- 37
- 38 94. Miskowiak KW, Vinberg M, Macoveanu J et al. Effects of Erythropoietin on Hippocampal  
39 Volume and Memory in Mood Disorders. *Biol Psychiatry* 2015;78:270-7.
- 40
- 41 95. Miskowiak KW, Macoveanu J, Vinberg M et al. Effects of erythropoietin on memory-  
42 relevant neurocircuitry activity and recall in mood disorders. *Acta Psychiatr Scand*  
43 2016;134:249-59.
- 44
- 45 96. Miskowiak KW, Vinberg M, Glerup L et al. Neural correlates of improved executive  
46 function following erythropoietin treatment in mood disorders. *Psychol Med* 2016;46:1679-  
47 91.
- 48
- 49 97. Brietzke E, Mansur RB, Soczynska JK, Kapczynski F, Bressan RA, McIntyre RS. Towards a  
50 multifactorial approach for prediction of bipolar disorder in at risk populations. *J Affect*  
51 *Disord* 2012;140:82-91.
- 52
- 53
- 54
- 55
- 56
- 57
- 58
- 59
- 60

- 1  
2  
3  
4 98. Weissman MM, Wickramaratne P, Adams P, Wolk S, Verdelli H, Olfson M. Brief screening  
5 for family psychiatric history: the family history screen. *Arch Gen Psychiatry* 2000;57:675-  
6 82.  
7  
8 99. Gallo V, Egger M, McCormack V et al. STrengthening the Reporting of OBservational  
9 studies in Epidemiology - Molecular Epidemiology (STROBE-ME): an extension of the  
10 STROBE statement. *Eur J Clin Invest* 2012;42:1-16.  
11  
12 100. von EE, Altman DG, Egger M, Pocock SJ, Gotzsche PC, Vandembroucke JP. The  
13 Strengthening the Reporting of Observational Studies in Epidemiology (STROBE)  
14 Statement: guidelines for reporting observational studies. *Int J Surg* 2014;12:1495-9.  
15  
16 101. van den Ameele S, van DL, Staels W et al. The effect of mood-stabilizing drugs on cytokine  
17 levels in bipolar disorder: A systematic review. *J Affect Disord* 2016;203:364-73.  
18  
19 102. Jacoby AS, Munkholm K, Vinberg M, Pedersen BK, Kessing LV. Cytokines, brain-derived  
20 neurotrophic factor and C-reactive protein in bipolar I disorder - Results from a prospective  
21 study. *J Affect Disord* 2016;197:167-74.  
22  
23 103. Laidi C, Houenou J. Brain functional effects of psychopharmacological treatments in bipolar  
24 disorder. *Eur Neuropsychopharmacol* 2016.  
25  
26 104. Munkholm K, Lenskjold T, Jacoby AS et al. Glycogen Synthase Kinase-3beta: Variation  
27 over Time and the Possible Association with Mood and Cognition in Healthy Individuals.  
28 *Neuropsychobiology* 2016;73:108-15.  
29  
30  
31  
32  
33  
34  
35  
36  
37  
38  
39  
40  
41  
42  
43  
44  
45  
46  
47  
48  
49  
50  
51  
52  
53  
54  
55  
56  
57  
58  
59  
60

# BMJ Open

## The Bipolar Illness Onset study - research protocol for the BIO cohort study

|                                 |                                                                                                                                                                                                                                                                                                                                                                                                                                                                                                                                                                                                                                                                                                                                                                                                                                                                                                                                                                                                                                                                                                                                                                                                                                                                                                                                                                                                                                                                                                                                                                                                                                                                                                                                                                    |
|---------------------------------|--------------------------------------------------------------------------------------------------------------------------------------------------------------------------------------------------------------------------------------------------------------------------------------------------------------------------------------------------------------------------------------------------------------------------------------------------------------------------------------------------------------------------------------------------------------------------------------------------------------------------------------------------------------------------------------------------------------------------------------------------------------------------------------------------------------------------------------------------------------------------------------------------------------------------------------------------------------------------------------------------------------------------------------------------------------------------------------------------------------------------------------------------------------------------------------------------------------------------------------------------------------------------------------------------------------------------------------------------------------------------------------------------------------------------------------------------------------------------------------------------------------------------------------------------------------------------------------------------------------------------------------------------------------------------------------------------------------------------------------------------------------------|
| Journal:                        | <i>BMJ Open</i>                                                                                                                                                                                                                                                                                                                                                                                                                                                                                                                                                                                                                                                                                                                                                                                                                                                                                                                                                                                                                                                                                                                                                                                                                                                                                                                                                                                                                                                                                                                                                                                                                                                                                                                                                    |
| Manuscript ID                   | bmjopen-2016-015462.R2                                                                                                                                                                                                                                                                                                                                                                                                                                                                                                                                                                                                                                                                                                                                                                                                                                                                                                                                                                                                                                                                                                                                                                                                                                                                                                                                                                                                                                                                                                                                                                                                                                                                                                                                             |
| Article Type:                   | Protocol                                                                                                                                                                                                                                                                                                                                                                                                                                                                                                                                                                                                                                                                                                                                                                                                                                                                                                                                                                                                                                                                                                                                                                                                                                                                                                                                                                                                                                                                                                                                                                                                                                                                                                                                                           |
| Date Submitted by the Author:   | 19-May-2017                                                                                                                                                                                                                                                                                                                                                                                                                                                                                                                                                                                                                                                                                                                                                                                                                                                                                                                                                                                                                                                                                                                                                                                                                                                                                                                                                                                                                                                                                                                                                                                                                                                                                                                                                        |
| Complete List of Authors:       | <p>Kessing, Lars; Copenhagen University Hospital, Psychiatric Center Copenhagen<br/> Munkholm, Klaus; Psychiatric Center Copenhagen, Department O, Rigshospitalet<br/> Faurholt-Jepsen, Maria; Psychiatric Center Copenhagen, Department O<br/> Miskowiak, Kamilla ; Psychiatric Center Copenhagen, Department O<br/> Nielsen, Lars; Rigshospitalet, Department of Clinical Biochemistry<br/> Frikke-Schmidt, Ruth; Rigshospitalet, Department of Clinical Biochemistry<br/> Ekstrøm, Claus; University of Copenhagen, Department of Biostatistics<br/> Winther, Ole; Technical University of Denmark, Department of Applied Mathematics and Computer Science<br/> Pedersen, Bente; Copenhagen University Hospital, The Centre of Inflammation and Metabolism at Department of Infectious Diseases<br/> Poulsen, Henrik ; Rigshospitalet, Laboratory of Clinical Pharmacology<br/> McIntyre , RS ; Canada McMaster University, Brain and Cognitive Discovery Foundation, Toronto, Ont.<br/> Kapczinski, Flavio; McMaster University<br/> Gattaz , Wagner; University of São Paulo, Department and Institute of Psychiatry, and Laboratory of Neuroscience (LIM27)<br/> Bardram, Jakob ; Technical University of Denmark, Department of Applied Mathematics and Computer Science<br/> Frost, Mads; IT University og Copenhagen, PIT lab<br/> Mayora, Oscar; Center for Research and Telecommunications Experimentation for Networked Communities<br/> Knudsen, Gitte ; Rigshospitalet, Neurobiology Research Unit and of Center for Integrated Molecular Brain Imaging<br/> Phillips, Mary; University of Pittsburgh, and the Western Psychiatric Institute and Clinic, Department of Psychiatry<br/> Vinberg, Maj; Psychiatric Center Copenhagen, Department O</p> |
| <b>Primary Subject Heading</b>: | Mental health                                                                                                                                                                                                                                                                                                                                                                                                                                                                                                                                                                                                                                                                                                                                                                                                                                                                                                                                                                                                                                                                                                                                                                                                                                                                                                                                                                                                                                                                                                                                                                                                                                                                                                                                                      |
| Secondary Subject Heading:      | Mental health                                                                                                                                                                                                                                                                                                                                                                                                                                                                                                                                                                                                                                                                                                                                                                                                                                                                                                                                                                                                                                                                                                                                                                                                                                                                                                                                                                                                                                                                                                                                                                                                                                                                                                                                                      |
| Keywords:                       | Depression & mood disorders < PSYCHIATRY, bipolar disorder, smartphone, biomarker, MRI scanning, cognition                                                                                                                                                                                                                                                                                                                                                                                                                                                                                                                                                                                                                                                                                                                                                                                                                                                                                                                                                                                                                                                                                                                                                                                                                                                                                                                                                                                                                                                                                                                                                                                                                                                         |
|                                 |                                                                                                                                                                                                                                                                                                                                                                                                                                                                                                                                                                                                                                                                                                                                                                                                                                                                                                                                                                                                                                                                                                                                                                                                                                                                                                                                                                                                                                                                                                                                                                                                                                                                                                                                                                    |

1  
2  
3  
4  
5  
6  
7  
8  
9  
10  
11  
12  
13  
14  
15  
16  
17  
18  
19  
20  
21  
22  
23  
24  
25  
26  
27  
28  
29  
30  
31  
32  
33  
34  
35  
36  
37  
38  
39  
40  
41  
42  
43  
44  
45  
46  
47  
48  
49  
50  
51  
52  
53  
54  
55  
56  
57  
58  
59  
60

SCHOLARONE™  
Manuscripts

For peer review only



# The Bipolar Illness Onset study - research protocol for the BIO cohort study

Lars Vedel Kessing, professor, MD, DMSc<sup>1,2</sup>  
Klaus Munkholm, MD, DMSc<sup>1</sup>  
Maria Faurholt-Jepsen, MD<sup>1</sup>  
Kamilla Woznica Miskowiak, associated professor, MSc, PhD<sup>1,2</sup>  
Lars Bo Nielsen, professor, MD, DMSc<sup>2,3</sup>  
Ruth Frikke-Schmidt, associated professor, MD, PhD, DMSc<sup>2,3</sup>  
Claus Ekstrøm, professor, MSc, PhD<sup>4</sup>  
Ole Winther, professor, MSc, PhD<sup>5,6</sup>  
Bente Klarlund Pedersen, professor, MD, DMSc<sup>7</sup>  
Henrik Enghusen Poulsen, professor, MD, DMSc<sup>8</sup>  
Roger S. McIntyre, professor, MD, FRCPC<sup>9</sup>  
Flavio Kapczinski, professor, MD, PhD, FRCPC<sup>10</sup>  
Wagner F. Gattaz, professor, MD, PhD<sup>11</sup>  
Jakob Bardram, professor, MSc, PhD<sup>5</sup>  
Mads Frost, MSc, PhD<sup>12</sup>  
Oscar Mayora, MSc, PhD<sup>13</sup>  
Gitte Moos Knudsen, professor, MD, DMSc<sup>14</sup>  
Mary Phillips, professor, MD, PhD<sup>15</sup>  
Maj Vinberg, associated professor, MD, PhD, DMSc<sup>1,2</sup>

Psychiatric Center Copenhagen, Department O, Denmark<sup>1</sup>  
University of Copenhagen, Institute of Clinical Medicine, Denmark<sup>2</sup>  
Department of Clinical Biochemistry, Rigshospitalet, Denmark<sup>3</sup>  
Department of Biostatistics, University of Copenhagen, Denmark<sup>4</sup>  
Technical University of Denmark, Department of Applied Mathematics and Computer Science, Denmark<sup>5</sup>  
Gene Regulation Bioinformatics at the Bioinformatics Centre, Dept. of Biology/BRIC, University of Copenhagen, Denmark<sup>6</sup>  
The Centre of Inflammation and Metabolism at Department of Infectious Diseases, Rigshospitalet, Copenhagen, Denmark<sup>7</sup>  
Laboratory of Clinical Pharmacology, Rigshospitalet, Denmark<sup>8</sup>  
Department of Psychiatry and Pharmacology, University of Toronto, Brain and Cognitive Discovery Foundation, Toronto, On., Canada<sup>9</sup>  
McMaster University, Canada<sup>10</sup>  
Department and Institute of Psychiatry, and Laboratory of Neuroscience (LIM27), University of São Paulo Medical School, Brazil<sup>11</sup>  
IT University Copenhagen, Denmark<sup>12</sup>  
Create-Net: Center for Research and Telecommunications Experimentation for Networked Communities, Trento, Italy<sup>13</sup>  
Neurobiology Research Unit and of Center for Integrated Molecular Brain Imaging, Rigshospitalet, Denmark<sup>14</sup>  
Department of Psychiatry, University of Pittsburgh, and the Western Psychiatric Institute and Clinic, Pittsburgh, USA<sup>15</sup>



1  
2  
3  
4  
5 **Correspondence to:**

6 Lars Vedel Kessing, Psychiatric Center Copenhagen, Department O, 6233

7 Blegdamsvej 9, 2100 Copenhagen, Denmark

8 and University of Copenhagen, Faculty of Health and Medical Sciences

9 Tel.: 45 - 38 64 70 81

10 Mail: lars.vedel.kessing@regionh.dk  
11  
12  
13  
14  
15  
16  
17  
18  
19  
20  
21  
22  
23  
24  
25  
26  
27  
28  
29  
30  
31  
32  
33  
34  
35  
36  
37  
38  
39  
40  
41  
42  
43  
44  
45  
46  
47  
48  
49  
50  
51  
52  
53  
54  
55  
56  
57  
58  
59  
60

For peer review only

1  
2  
3  
4 **Introduction:** Bipolar disorder is an often disabling mental illness with a lifetime prevalence of 1-  
5  
6 2%, a high risk of recurrence of manic and depressive episodes, a lifelong elevated risk of suicide  
7  
8 and a substantial heritability. The course of illness is frequently characterised by progressive  
9  
10 shortening of inter-episode intervals with each recurrence and increasing cognitive dysfunction in a  
11  
12 subset of individuals with this condition. Clinically, diagnostic boundaries between bipolar disorder  
13  
14 and other psychiatric disorders such as unipolar depression are unclear although pharmacological  
15  
16 and psychological treatment differs substantially. Patients with bipolar disorder are often  
17  
18 misdiagnosed and the mean delay between onset and diagnosis is 5-10 years. Although the risk of  
19  
20 relapse of depression and mania is high it is for most patients impossible to predict and  
21  
22 consequently prevent upcoming episodes in an individual tailored way. The identification of  
23  
24 objective biomarkers can both inform bipolar disorder diagnosis and provide biological targets for  
25  
26 the development of new and personalized treatments. Accurate diagnosis of bipolar disorder in its  
27  
28 early stages could help to prevent the long-term detrimental effects of the illness.

29  
30  
31  
32 The present Bipolar Onset study (BIO) study aims to identify 1) a composite blood-based biomarker  
33  
34 2) a composite electronic smartphone-based biomarker and 3) a neurocognitive and neuroimaging  
35  
36 based signature for bipolar disorder.  
37  
38

39 **Methods and analysis:** The study will include 300 patients with newly diagnosed/first episode  
40  
41 bipolar disorder, 200 of their healthy siblings or offspring, and 100 healthy individuals without a  
42  
43 family history of affective disorder. All participants will be followed longitudinally with repeated  
44  
45 blood samples and other biological tissues, self-monitored and automatically generated smartphone  
46  
47 data, neuropsychological tests and a subset of the cohort with neuroimaging during a 5-10 year  
48  
49 study period.  
50  
51

52 **Ethics and dissemination:** The study has been approved by the Local Ethical Committee (H-7-  
53  
54 2014-007) and the data agency, Capital Region of Copenhagen (RHP-2015-023) and the findings  
55  
56  
57  
58  
59  
60

1  
2  
3  
4 will be widely disseminated at international conferences and meetings including conferences for the  
5  
6 International Society for Bipolar Disorders (ISBD) and the World Federation of Societies for  
7  
8 Biological Psychiatry (WFSBP) and in scientific peer reviewed papers.  
9

10  
11 **Trial Registration Number:** NCT02888262.  
12  
13

14  
15  
16  
17  
18  
19  
20  
21  
22  
23  
24  
25  
26  
27  
28  
29  
30  
31  
32  
33  
34  
35  
36  
37  
38  
39  
40  
41  
42  
43  
44  
45  
46  
47  
48  
49  
50  
51  
52  
53  
54  
55  
56  
57  
58  
59  
60

For peer review only

**Strengths**

- The BIO study is the first study aiming to identify 1) a composite blood-based biomarker, 2) a composite electronic smartphone-based biomarker and 3) a neurocognitive signature for bipolar disorder
- The same biomarkers will be measured longitudinally in newly diagnosed/first episode bipolar patients and their healthy first-generation relatives
- The BIO study will be performed by an experienced international research group, combining expertise from all areas of the study

**Limitations**

- Extensive initial assessment study procedures may result in selection of participants that are intrinsically positive towards clinical research
- Confounding effects of psychotropic medication may influence results
- Lack of randomized interventions may limit causal interpretations of the results

## Introduction

### Biomarkers in bipolar disorders

Bipolar disorder is a disabling mental illness with a lifetime prevalence of 1-2%, a high risk of recurrence of manic and depressive episodes, a lifelong elevated risk of suicide and a substantial heritability of 60-80% (1). Bipolar disorder is often conceptualised as a progressive disorder with increasing risk of recurrence for every new affective episode (2-5) and with increasing cognitive disabilities during the course of illness (6-9). Clinically, diagnostic boundaries between bipolar disorder and other psychiatric disorders such as unipolar disorder are unclear although some pharmacological and psychological treatment strategies differ substantially. Patients with bipolar disorder are often misdiagnosed as having from unipolar disorder, transient psychosis, reaction to stress/adjustment disorder or psychoactive substance abuse (10) and the mean delay between onset and diagnosis is 5-10 years (11). Although the risk of relapse of depression and mania is high it is for most patients impossible to predict and consequently prevent upcoming episodes in an individual tailored way. The identification of objective biomarkers as measures of pathophysiologic processes can both inform bipolar disorder diagnosis and provide biological targets for the development of new and personalized treatments (12). Accurate diagnosis of bipolar disorder in its early stages could help to prevent the long-term detrimental effects of the illness.

Recently, promising results have been presented regarding a diagnostic test for unipolar depression comprising levels of nine biomarkers in peripheral blood (13). Although the nature of bipolar disorder seems more biological driven than the nature of major depression with a higher heritability there has been no or few attempts to identify a similar composite biomarker for bipolar disorder.

### *Onset of illness and staging in bipolar disorder*

1  
2  
3  
4 Although the course of illness is heterogeneous there is a body of evidence for clinical progression  
5 on average of unipolar and bipolar disorders as increasing number of affective episodes seem  
6 associated with 1) increasing risk of recurrence 2) increasing duration of episodes 3) increasing  
7 symptomatic severity of episodes 4) decreasing threshold for developing episodes 5) increasing risk  
8 of developing dementia (9). It is likely that this clinical progression with deteriorating effects of  
9 affective episodes and duration of illness is associated with neurobiological changes over the course  
10 of illness. Unfortunately, results of all longitudinal studies on the biology of bipolar disorder are  
11 hitherto hampered by three major limitations: 1) Only few studies have recruited patients with  
12 bipolar illness from onset of the illness and most of these have used first onset mania as inclusion  
13 criteria thereby excluding patients with a hypomanic episode (bipolar disorder, type II). As the  
14 biology of bipolar disorder - based on cross-sectional studies - seem to change over the course of  
15 illness from first episode to first relapse and recurrent relapses to an unremitting or rapid cycling  
16 course (14-18), this is a major limitation in our knowledge internationally, 2) the number of patients  
17 included in prior studies are less than 200, which is a limitation taking the heterogeneity of bipolar  
18 disorder into account (e.g. bipolar disorder type I and II may have different biology, etc.), and 3) the  
19 prospective follow-up period is less than a few years in all studies.

20  
21  
22  
23  
24  
25  
26  
27  
28  
29  
30  
31  
32  
33  
34  
35  
36  
37  
38  
39  
40 In the BIO study we will establish a large cohort comprising of three sub cohorts that will be  
41 followed long-term with systematic diagnostic, blood-based biomarkers, smartphone data, cognitive  
42 and brain imaging assessment. The three sub cohort will consist of: 1) patients with newly  
43 diagnosed/first episode bipolar disorder and 2) their healthy first-generation siblings and offspring  
44 3) healthy individuals without a family history of affective disorder.

45  
46  
47  
48  
49  
50  
51  
52  
53 Overall aims:  
54  
55  
56  
57  
58  
59  
60

- 1  
2  
3  
4 1. To identify a composite blood-based biomarker measure as well as a composite electronic  
5  
6 smartphone-based biomarker from onset of bipolar disorder, during progression and in later  
7  
8 stages  
9
- 10  
11 2. To investigate if the composite blood-based biomarker measure and electronic smartphone-  
12  
13 based biomarker identified among patients with bipolar disorder predicts onset of illness  
14  
15 (depression or mania) among these patients healthy first-generation siblings and offspring  
16  
17
- 18 3. By applying an integrated systems approach, to identify patterns of “cerebral signatures”  
19  
20 across neuro circuitry and cognitive levels and to validate the composite blood-based  
21  
22 biomarker and electronic smartphone-based biomarkers against these bio-signatures  
23
- 24 4. To investigate long-term developmental trajectories in neurocognitive function and brain  
25  
26 imaging from the high risk state to onset of bipolar disorder following first relapse and  
27  
28 recurrent relapses and in the late stage with an unremitting, multi-episode or rapid cycling  
29  
30 course.  
31
- 32  
33 5. To investigate whether the course of illness is progressive on average in bipolar disorder and  
34  
35 to identify corresponding changes in biomarkers during the course of illness within BIO-1 to  
36  
37 BIO-4.  
38  
39  
40  
41

## 42 Methods and analysis

### 43 Overall methods

44  
45  
46 The BIO study is a long-term cohort study started April 2015 and planned to include 300 newly  
47  
48 diagnosed/first episode bipolar patients from the Copenhagen Affective Disorder Clinic, 200 of  
49  
50 these patients’ healthy first-generation relatives and 100 healthy individuals *without* a first-  
51  
52 generation family history of affective disorders.  
53  
54  
55  
56  
57  
58  
59  
60

#### The Copenhagen Affective Disorder Clinic

The Copenhagen Affective Disorder Clinic is a mood disorder clinic that provides treatment service for patients with newly diagnosed/first episode bipolar disorder (19). The Copenhagen Affective Disorder Clinic receives patients from the entire Capital Region of Denmark covering a catchment area of 1.6 million people and all psychiatric centres in the region. All patients referred to the Clinic as newly diagnosed/first episode patients, i.e., onset of first manic or hypomanic episode or when the ICD-10 diagnosis of bipolar disorder is made for the first time, will routinely be asked for inclusion in the BIO study. Nearly all patients treated in the Clinic have a diagnosis of bipolar disorder type I or type II whereas patients with bipolar disorder-not otherwise specified (NOS) or patients with cyclothymia not are treated in the Clinic and consequently not included in the BIO study.

#### Recruitment of the three cohorts:

1. 300 patients referred to the Copenhagen Affective Disorder Clinic (aged 15-70 years) as newly diagnosed/first episode bipolar patients, i.e., onset of first manic or hypomanic episode or when the diagnosis of bipolar disorder is made for the first time. The Clinic receives more than 100 newly diagnosed/first episode bipolar patients each year and we expect that nearly all will accept participation in the BIO study as this implies an extensive clinical evaluation.
2. 200 first-generation relatives (siblings and children aged 15 to 40 years) to the recruited newly diagnosed/first episode bipolar patients.
3. 100 age- and gender-matched healthy individuals *without* a first-generation family history of affective disorders recruited among blood donors from the Blood Bank at Rigshospitalet, Copenhagen, as in prior studies.



#### Diagnostic assessments at inclusion

The initial diagnostic assessment will be done using the Structured Clinical Interview for DSM-IV-TR Axis I Disorders (SCID (20)) categorizing patients in bipolar disorder type I or type II as part of daily praxis by the experienced specialists in psychiatry during the patients two year stay in the Copenhagen Affective Disorder Clinic. This clinical diagnosis of bipolar disorder will be confirmed in a semi-structured research based interview using the Schedules for Clinical Assessment in Neuropsychiatry (SCAN) providing an ICD-10 diagnosis (21). There will be no attempt to balance the prevalence of bipolar subtypes in the BIO study.

#### Follow-up

Besides the assessments at inclusion, patients will be assessed during remitted, depressive and manic/mixed phases. Patients and healthy control individuals will be face to face assessed initially and at least every year during the first four years and after this, every second year for five years.

As part of daily clinical praxis in Copenhagen Affective Disorder Clinic and as part of the BIO-2 sub-study all patients will get access to a smartphone app for electronic continuous monitoring of illness activity during a 5-year follow-up period (see sub-study BIO-2). Additionally, research assistants will contact all participants every third months to identify upcoming episodes / onset of illness and to ensure continued participation in the BIO study. At each assessment the present, clinical state (remission, manic, hypomanic, depressive, mixed episode) of all participants will be established according to ICD-10. The severity of depressive and manic symptoms (if present) will be assessed using the 17-item Hamilton Depression Rating Scale (HAM-D-17) (22) and the Young Mania Rating Scale (YMRS) (23) with a time period of three days applied. Remission is defined as

1  
2  
3  
4 score of  $\leq 7$  on the HAMD-17 and the YMRS. In this way upcoming episodes and onset of illness  
5  
6 (for healthy individuals) will be assessed with great certainty.  
7

8  
9 Based on prior findings (2;3;19), it is estimated that patients will develop four to five affective  
10  
11 episodes on average during the follow-up period, i.e., relapse or recurrence, defined as above. It  
12  
13 estimated that 20-30% of the healthy first-generation relatives will develop onset of affective illness  
14  
15 compared to 2-5% among the healthy individuals *without* a first-generation family history of  
16  
17 affective disorders (24;25). Finally, linkage to Danish nation-wide register based data will be  
18  
19 included for all individuals on psychiatric hospitalisations, prescribed medication and  
20  
21 socioeconomic variables during the five years follow-up.  
22  
23

## 24 25 26 Investigations

27  
28 We will include state of the art methods within clinical assessment as well as biomarkers including  
29  
30 a range of new methods:  
31

- 32  
33 1. Clinical assessments using the Hamilton Depression Scale-17 items (HAMD-17) (22), the  
34  
35 Young Mania Rating Scale (YMRS) (23), the Functional Assessment Short Test (FAST) (a  
36  
37 measure of psychosocial function) (26)  
38
- 39  
40 2. Questionnaires including the Hypomania Check list (27), Standardized Assessment of  
41  
42 Personality - Abbreviated Scale (SAPAS) (28), the WHO (Five) well-being index (29) and  
43  
44 the Verona Satisfaction Scale-Affective Disorder (VSS-A) (30).  
45
- 46  
47 3. Standardised fasting blood tests for a large number of potential biomarkers (see later  
48  
49 section: BIO-1, Biological tests).  
50
- 51  
52 4. Spot urine samples for oxidative generated damage to DNA and RNA  
53
- 54  
55 5. Hair cortisol as a valid and reliable index of long-term systemic cortisol levels (31)  
56
- 57  
58 6. Combined heart rate and movement sensor mounted at the thorax (Actiheart; (32;33)).  
59  
60

- 1
- 2
- 3
- 4 7. Daily electronic smartphone based self-monitoring of depressive and manic symptoms
- 5
- 6 8. Daily electronic smartphone-based automatically generated data (e.g. data on phone usage,
- 7 social activity and physical activity)
- 8
- 9
- 10
- 11 9. Neuropsychological assessment (only during full or partial remission)
- 12
- 13 10. Structural magnetic resonance imaging (MRI) focusing on prefrontal cortex and
- 14 hippocampus as well as functional MRI (fMRI) (only during full or partial remission).
- 15
- 16
- 17
- 18
- 19

20 Clinical assessments will be performed by six PhD students (Master degree as a Medical Doctor or  
21 psychologist). They will be certified in a PhD training course in the SCAN interview and will be  
22 trained in using rating scales (HAM-D-YMRS, FAST). Inter-rater sessions supervised by senior  
23 clinicians from the Copenhagen Affective Disorder Clinic and senior researchers in the BIO study  
24 will be conducted among the researchers at regular time points during the entire study period.  
25  
26  
27  
28  
29  
30  
31  
32

33 The BIO study includes four separate but interacting sub-studies (BIO-1, BIO-2, BIO-3, BIO-4), as  
34 illustrated in Table 1 with specified aims, background and theoretical basis, and methods, as  
35 described in the following. Background and reasons for selection of putative biomarkers is an  
36 iterative process presented in each sub-study. Nevertheless, as the area of potential biomarkers is  
37 constantly evolving and as the sub-studies cover four different areas, the research protocol does not  
38 include systematic reviews of the literature.  
39  
40  
41  
42  
43  
44  
45  
46  
47  
48

#### 49 **BIO-1: peripheral blood-based biomarker in bipolar disorder**

##### 50 Aims

51  
52  
53  
54  
55  
56  
57  
58  
59  
60

1  
2  
3  
4 To identify a composite blood-based biomarker that 1) discriminates bipolar disorder from healthy  
5 control individuals 2) discriminates between manic, depressive and remitted states 3) predicts  
6 emerging affective episodes, and 4) to validate the composite blood-based biomarker against the  
7 Smartphone-based biomarker, and the neurocognitive and brain imaging signature, and 5) to  
8 investigate the change in individual biomarkers as well as the composite blood-based biomarker  
9 following onset of first manic episode, during successive relapses and in the end late stages of the  
10 illness (15).  
11  
12  
13  
14  
15  
16  
17  
18  
19

## 20 21 Background and theoretical basis

22  
23 In a series of meta-analyses we concluded that although a number of candidate peripheral  
24 biomarkers related to neuroplasticity, inflammation, oxidative stress and gene expression seem  
25 promising, findings are limited by poor study designs, small cross sectional samples, lack of  
26 adjustment for important confounders related to most peripheral biomarkers and poor laboratory  
27 methodology (34-37). Because of high inter-individual variation in peripheral biomarkers,  
28 assessment of intra-individual alterations from onset of illness through different affective phases  
29 and into the late illness stage is necessary to identify clinically relevant and valid biomarkers,  
30 necessitating a longitudinal study design (35;38).  
31  
32  
33  
34  
35  
36  
37  
38  
39  
40  
41

42 We have in two longitudinal studies with repeated assessments of patients with bipolar disorder  
43 during affective states (manic/mixed, depressive and euthymic) and healthy control individuals  
44 found that brain derived neurotrophic factor (BDNF) (39), increased oxidative DNA and RNA  
45 damage (40;41) and decreased mRNA expression of the PTGDS gene encoding the prostaglandin D  
46 synthase enzyme (42) are markers related to the illness trait in bipolar disorder. The level of the  
47 cytokines IL-6 and IL-18 was related to manic episodes only and the activity of GSK-3beta varied  
48 with affective states (43) suggesting that these may be state markers (44). These results have  
49  
50  
51  
52  
53  
54  
55  
56  
57  
58  
59  
60

1  
2  
3  
4 contributed to the research area of biomarkers in bipolar disorder, moving the area closer towards  
5  
6 identifying clinically applicable biomarkers.  
7

8  
9 Nevertheless, it is unlikely, that one single biomarker will provide a useful diagnostic tool; instead a  
10  
11 composite of several relevant biomarkers appears a more viable approach (45). Recently promising  
12  
13 results have been presented regarding a diagnostic test in unipolar depression comprising serum  
14  
15 levels of nine individual biomarkers in peripheral blood (13). Similarly, preliminary studies have  
16  
17 suggested composite biomarkers for bipolar disorder (46-48). We identified a composite biomarker  
18  
19 consisting of gene expression from 19 candidate genes for bipolar disorder that accurately  
20  
21 discriminated bipolar patients from healthy control individuals (46). Thus, such approaches highly  
22  
23 increase the chances of obtaining a high specificity and sensitivity of the composite blood-based  
24  
25 biomarker (46-48).  
26  
27

28  
29 In order to establish relevant markers of risk and markers related to illness stage, it is necessary to  
30  
31 include assessment before onset of illness and during first- and recurrent relapses and in the late  
32  
33 stages of the illness according to the staging model of bipolar disorder (49). Further, the study of  
34  
35 early onset individuals is necessary to evaluate biomarker levels without influence from medication,  
36  
37 which may otherwise limit the validity of identified biomarkers.  
38  
39  
40

#### 41 Methods

42  
43 BIO-1 will include repeated clinical assessments and corresponding samples of blood and other  
44  
45 tissues among the 300 newly diagnosed/first episode bipolar patients, the 200 first-generation  
46  
47 relatives and the 100 healthy individuals *without* a first-generation family history of affective  
48  
49 disorder.  
50  
51

52  
53 We will estimate a composite blood-based biomarker based on a number of individual markers  
54  
55 including brain-derived neurotrophic factor (BDNF), neutrophin-3 (NT-3), 5 different cytokines,  
56  
57  
58  
59  
60

1  
2  
3  
4 gene expression, additional thirty candidate genes and other potential biomarkers (see Biological  
5 tests), and identify the composite biomarker that correlates best with affective states and Hamilton  
6  
7  
8  
9 Depression Rating Scale and Young Mania Rating Scale scores of depression and mania,  
10  
11 respectively. A final blood-based biomarker will be chosen based on its ability to 1) discriminate  
12  
13 patients with bipolar disorder from healthy control individuals and to 2) discriminate between  
14  
15 manic, depressive and remitted states in bipolar disorder.  
16  
17  
18  
19

#### 20 Laboratory procedures

21  
22 We will obtain careful standardization of blood sampling and laboratory analysis by obtaining  
23  
24 blood samples in a fasting state and in a one hour interval in the morning. At the same day as blood  
25  
26 sampling, smoking status, alcohol use, BMI and menstrual cycle, etc., will be assessed. Blood  
27  
28 sampling and all phases of laboratory processing for plasma and DNA/RNA analyses will be done  
29  
30 at the Department of Clinical Biochemistry, Rigshospitalet using standard operational methods  
31  
32 conducted by a team of technicians blinded with respect to participant status. All plasma samples  
33  
34 will be stored at – 80 C. The BIO study will include a total of 2400 blood samples: 300 patients x 5  
35  
36 + 200 healthy first-generation relatives x 3 + 100 healthy participants without a first-generation  
37  
38 family history x 3.  
39  
40  
41  
42  
43

#### 44 Biological tests

45  
46 We will use a multianalyte panel including a large number of potential biomarkers such as plasma  
47  
48 levels of Neutrophins3, GSK-3,  $\beta$ -amyloid A $\beta$ 40 and A $\beta$ 42, BDNF, inflammatory markers, high  
49  
50 sensitive C-reactive protein, lipoproteins (VLDL, LDL, HDL) and specific apolipoproteins (e.g.  
51  
52 apoE, ApoA-I, apoA-II, and apoM) as potential markers of low-grade inflammation particularly  
53  
54 salient in the early stages of bipolar disorder. Total RNA, microRNA, genomic DNA and histones  
55  
56  
57  
58  
59  
60

1  
2  
3  
4 are isolated from peripheral blood mononuclear cells. Gene expression and alternative slicing of  
5  
6 RNA transcripts are analysed using array reverse transcription quantitative real-time PCR (RT-  
7  
8 qPCR) and next generation sequencing. Epigenetic modifications of the DNA (e.g. methylation) are  
9  
10 measured using antibody based methods or bisulphite treatments in combination with next  
11  
12 generation sequencing. The genomic positions of histones with specific modifications are detected  
13  
14 using immune precipitation and sequencing (CHIP-Seq). The degree of histone modifications is  
15  
16 measured by semi-quantitative antibody based detection.  
17

18  
19 Measurements of DNA and RNA damage by oxidation are obtained from spot urine samples and  
20  
21 analyzed using ultra performance liquid chromatographic (UPLC) and mass spectrometry.  
22

23  
24 Hair cortisol will be included as a valid and reliable index of long-term systemic cortisol levels  
25  
26 (31).  
27

28  
29 We will report on these individual biological tests including comparing patients, first degree  
30  
31 relatives and healthy control individuals, when appropriate. The BIO study sample of 600  
32  
33 participants is rather small for genetic analyses discriminating patients with bipolar disorder from  
34  
35 healthy controls but some genetic analyses, including the CACNA1C gene, can be conducted in  
36  
37 cooperation with national and international genetic network groups.  
38

#### 39 40 41 Statistical analyses

42  
43 Data represent repeated measures within and between individuals and will be analysed using a  
44  
45 combination of generalized linear mixed models, integrated data analysis, and penalized regression  
46  
47 approaches to facilitate the combined feature selection and prediction of the available high-  
48  
49 dimensional data. Integrative data analysis ensures that we are able to identify an improved  
50  
51 composite blood-based biomarker since data from different molecular levels are combined in a  
52  
53 simultaneous analysis that closer resembles the biological system (50;51). Further, we will use cross  
54  
55  
56  
57  
58  
59  
60

1  
2  
3  
4 validation or alternatively split sample designs in the development and validation of the composite  
5  
6 biomarker. Finally, if possible we will evaluate the biomarker(s) in external non-Danish data sets in  
7  
8 collaboration with other international researchers.  
9

10 A general principle that pertains to statistical analyses of all four sub-studies is the “intention to  
11  
12 treat” principle. Accordingly, participants who during follow-up get a diagnosis with a higher  
13  
14 diagnostic validity than bipolar disorder (i.e. a lower ICD-10 diagnostic number, DF00, DF10 and  
15  
16 DF20) that may substantially influence the biomarker measures are included in the analyses until  
17  
18 onset of symptoms from the disorder but excluded from subsequent analyses. These disorders  
19  
20 include significant neurological disorders such as dementia, stroke, brain tumour, multiple sclerosis,  
21  
22 Parkinson’s disease, as well as disorders due to significant psychoactive substance use and  
23  
24 schizophrenia“.  
25  
26  
27

28 Furthermore, in all four sub-studies, the problem of missing data will be alleviated by the use of mixed  
29  
30 effect model (for longitudinal measurements) and multiple imputations using chained equations  
31  
32 when applicable. If possible, joint modeling will be considered, depending on the missing  
33  
34 mechanism observed.  
35  
36  
37  
38

### 39 Statistical power

40  
41 The study has a power of 80% to detect a minimum increment of 6.5 percentage points in sensitivity  
42  
43 if we assume that the existing diagnostic tools have a sensitivity of 70% to diagnose bipolar  
44  
45 disorder for a patient that has the disorder (see (52)). Thus, if the composite biomarker score  
46  
47 increases the sensitivity by a minimum of 6.5 percentage points then we have a power of 80% to  
48  
49 detect that increase based on 300 patients with bipolar disorder using a one-sided exact binomial  
50  
51 test (for fixed specificity).  
52  
53  
54  
55  
56  
57  
58  
59  
60



## **BIO-2: Smartphone-based electronic biomarker in bipolar disorder**

### Aims

To identify a composite smartphone-based electronic biomarker that 1) discriminates patients with bipolar disorder from healthy control individuals 2) discriminates between manic, depressive and remitted states 3) predicts emerging affective episodes, and 4) to investigate the change in the composite smartphone-based biomarker following onset of first manic episode, during successive relapses and in the end stages of the illness as according to the staging system by Berk et al (15).

### Background and theoretical basis

Recently, electronic self-monitoring of the severity of depressive and manic symptoms using text messages has been suggested as an easy and inexpensive way to identify early signs of affective episodes, providing opportunities for mental health care providers to intervene shortly after prodromal symptoms first appear (53). We have, in the MONARCA project developed and tested a smartphone-based electronic monitoring system including daily subjective self-assessments of illness activity in bipolar disorder as well as a bi-directional feedback loop between the patient and clinicians (the MONARCA system (54-58)). Using the MONARCA system, fine-grained electronic data were collected during everyday life in naturalistic settings in patients with bipolar disorder. The MONARCA system was reported highly usable and useful by patients with bipolar disorder with a high self-assessment adherence (87-95%), and the patients reported that the MONARCA system helped them to better manage their disease (54;55). Further, the severity of depressive and manic symptoms was found to correlate with automatically generated smartphone data including 1) physical activity as reflected by the number of changes in cell tower ID per day (59), 2) social activity as reflected by the number of incoming and outgoing calls per day, the duration of incoming and outgoing calls per day, and the number of outgoing text messages per day (60), and 3)

1  
2  
3  
4 voice features collected during phone calls (61). Although these findings are encouraging there is a  
5  
6 need to integrate self-monitored smartphone data with automatically generated smartphone data on  
7  
8 social and physical activity, speech and sleep into one composite smartphone generated electronic  
9  
10 biomarker measure. This composite measure should be modeled to 1) discriminate patients with  
11  
12 bipolar disorder from healthy control individuals 2) have a high correlation with depressive and  
13  
14 manic symptoms 3) discriminate between euthymic, manic and depressive states 4) early predict  
15  
16 emerging affective episodes for the individual patient to increase the possibility for early  
17  
18 intervention.  
19  
20

21  
22 To validate smartphone based measures of physical activity and sleep, a subset of patients will wear  
23  
24 a combined heart rate and movement sensor mounted at the thorax that has been shown to correlate  
25  
26 with mood symptoms and affective states and differentiate between patients and controls (Actiheart;  
27  
28 (32;33)) like other wearable actigraphs (62-64).  
29  
30

### 31 32 Methods:

33  
34 All newly diagnosed/first episode patients will have access to a smartphone based system  
35  
36 (Monsenso that is a developed from the MONARCA system) for continuous self-monitoring as well  
37  
38 as fine-grained automatically monitoring of behavioural activity and early identification of  
39  
40 emerging affective episodes during the first two years and following relapse of episodes during a 5-  
41  
42 year follow-up period.  
43  
44

45  
46 Data analyses: In contrast to data in BIO-1, data in BIO-2 represent big data collected on a *daily* basis  
47  
48 within individuals. We will use hierarchical Bayesian predictive models that can handle big data through  
49  
50 sampling and visualization techniques that summarize data.  
51  
52

### 53 54 **BIO-3: neurocognitive and brain imaging signatures in bipolar disorder**

### Aims

1) To identify an integrated brain-based biomarker of bipolar disorder including neurocognitive and neuroimaging measures tapping into ‘hot’ (i.e. emotion-laden) and ‘cold’ (non-emotional) cognition, 2) to examine whether the degree of abnormality in these measures predicts illness onset in the high-risk group and/or relapse in the patient group, 3) to identify developmental trajectories in ‘hot’ and ‘cold’ cognitive dysfunction and to identify structural and functional MRI correlates in bipolar disorder via longitudinal assessments of high-risk individuals to remission after onset of first manic episode and following successive relapses, and 4) to identify associations between aberrant ‘hot’ and ‘cold’ neurocognitive function, structural and functional brain changes and the composite blood-based and Smartphone-based biomarkers. Such ‘integrated systems approach’ involving identification of patterns of biomarkers (bio-signatures) across these multiple levels of investigation is considered imperative for deeper understanding of the dimensions of underlying pathophysiological processes in bipolar disorder (12).

### Background and theoretical basis

Results from a number of meta-analyses of a large number of cross sectional studies of patients with bipolar disorder in remission suggest trait-related ‘cold’ cognitive deficits in attention/processing speed, memory, and executive function compared to healthy controls (65-68) that correlate with everyday functioning (69). Cross-sectional comparison of patients at different illness stages revealed more pronounced cognitive deficits during late compared with early stages in line with the staging hypothesis of bipolar disorder (70). However, there are only a few longitudinal studies of neuropsychological functioning with small sample sizes (12 studies including a total of 152 bipolar patients (71)). A meta-analysis of these studies found no support for a progressive nature of cognitive deficits (71). However, results from these studies are hampered by a number of limitations

1  
2  
3  
4 including small sample sizes, short follow-up (mean follow-up period of 4.6 years) and high  
5  
6 attrition rates (up to 45%) (71). Consequently, it is unclear whether cognitive function assessed with  
7  
8 neuropsychological tests deteriorate with the number and duration of illness episodes in bipolar  
9  
10 disorder although epidemiological studies consistently revealed increased risk of developing  
11  
12 dementia long-term (6;8;72-74) and there are some evidence for increasing risk of dementia with  
13  
14 the number of episodes (7) (see also (9)).

15  
16  
17 Deficits in 'hot' cognition are closely linked to emotional disturbances (75) and difficulties in socio-  
18  
19 emotional behaviour and interpersonal relations in bipolar disorder (76). 'Hot' cognition  
20  
21 abnormalities in bipolar disorder have been observed within three domains; (i) emotional  
22  
23 processing, (ii) reward processing and (iii) emotion regulation (reviews in (77;78)).

24  
25  
26 Results from a large number of cross sectional structural imaging studies suggest that patients also  
27  
28 show increased lateral ventricular volumes and greater prevalence of white matter hyper-intensities  
29  
30 (79). While these findings are rather unspecific, studies also suggest that treatment with lithium  
31  
32 increases the grey matter volume of prefrontal cortex, amygdala and hippocampus (79). In addition,  
33  
34 a number of functional imaging studies suggest that bipolar disorder is associated with  
35  
36 abnormalities within fronto-limbic-subcortical structures (38).

37  
38  
39 As long-term, integrative studies are lacking, it is unclear how neurocognitive and brain imaging  
40  
41 abnormalities correlate with the staging of bipolar disorder, illness progression and treatment  
42  
43 (38;80) or with changes in biological markers such as neurotropic, inflammatory and oxidative  
44  
45 stress markers (81;82).  
46  
47  
48  
49

## 50 Methods

51  
52  
53 Using a comprehensive neurocognitive test battery, we will assess all participants from the three  
54  
55 groups (patients with bipolar disorder, first-generation relatives, and healthy individuals *without a*  
56  
57  
58  
59  
60

1  
2  
3  
4 family history of affective disorders). Patients will be followed from first onset of affective disorder  
5  
6 and during successive periods of remission or at an annual basis (bipolar patients with no relapse,  
7  
8 first-generation relatives with no onset, and healthy controls. Among these, a subgroup of 60  
9  
10 patients, 60 healthy relatives (UR) and 30 healthy without a family history of affective disorders  
11  
12 (HC) will be undergo functional and structural MRI at these time points  
13  
14

#### 15 16 17 Neurocognitive testing

18  
19 Within ‘cold’ cognition verbal learning/memory and executive function have been highlighted as  
20  
21 the most suitable candidates for biomarkers of bipolar disorder (83;84). ‘Cold’ cognition will  
22  
23 therefore be assessed with neurocognitive tests probing verbal memory, attention and executive  
24  
25 function including the Rey Auditory Verbal Learning Test (RAVLT; (85;86)) and the WAIS-III  
26  
27 letter-number sequencing, RBANS digit span, n-back working memory, verbal fluency and Trail  
28  
29 Making Test B. Verbal intelligence will be estimated with the Danish Adult Reading Test (DART).  
30  
31 ‘Hot’ cognition will be assessed with a comprehensive battery of computerized neurocognitive tests  
32  
33 outside the scanner probing (i) emotional processing (ii) reward processing and (iii) emotion  
34  
35 regulation. These include the facial expression recognition and faces dot-probe tasks from the  
36  
37 Emotional Test Battery (ETB) (P1 Vital, Oxford), and an ecologically valid social scenarios test  
38  
39 developed by our group (87). During fMRI we will also administer the following experimental  
40  
41 paradigms: an emotional face processing task using face stimuli from the Nimstim  
42  
43 (<http://www.macbrain.org/resources.htm>), a monetary reward processing task (88), and (iii) a  
44  
45 negative affective picture task using validated stimuli sets from the International Affective Picture  
46  
47 System (IAPS) developed in collaboration with researchers at the Universities of Chicago. In  
48  
49 addition, we will explore the neuronal basis for ‘cold’ cognition (executive function) using n-back  
50  
51 working memory and picture encoding tasks programmed in house (89). Finally, self-report  
52  
53  
54  
55  
56  
57  
58  
59  
60

1  
2  
3  
4 measures (BIS/BAS, and the CERQ (90)) are used to assess reward responsiveness and habitual  
5  
6 emotional regulation strategies.  
7  
8  
9

### 10 11 12 13 Structural and functional MRI

14  
15 Structural MRI: using T1-weighted images acquired at a 3T Siemens scanner at the Copenhagen  
16  
17 University Hospital, Rigshospitalet, we will focus on lateral ventricular volumes, grey matter  
18  
19 volume of prefrontal cortex, amygdala and hippocampus, relative to whole brain volume.  
20

21  
22 Specifically, segmentation and analysis of subcortical and regional cortical volume, shape and grey  
23  
24 matter density will be conducted FMRIB Software Library (FSL) tools, including the FMRIB's  
25  
26 Integrated Registration and Segmentation Tool (FIRST), the FSL-VBM tool and FSL vertex (shape)  
27  
28 analysis (<http://fsl.fmrib.ox.ac.uk/>).  
29

30  
31 Functional MRI (fMRI): T2-weighted images will be acquired to investigate white matter hyper-  
32  
33 intensities. We will also use fMRI to investigate neuronal underpinnings of 'hot' and 'cold'  
34  
35 cognition with the previously described experimental paradigms. Functional MRI data processing  
36  
37 will be carried out with the FMRI Expert Analysis Tool, part of FMRIB's Software Library  
38  
39 ([www.fmrib.ox.ac.uk/fsl](http://www.fmrib.ox.ac.uk/fsl)). We will examine mean percent BOLD signal change within predefined  
40  
41 hippocampal and amygdala Regions of Interest (ROIs) obtained in standard space with mri3dX  
42  
43 (<http://www.idoimaging.com/program/160>). In addition, whole-brain exploratory analysis will be  
44  
45 conducted to explore neural activity differences in other cortical regions. For this group analysis,  
46  
47 individual contrasts of interest will be included in separate general linear models with  
48  
49 nonparametric permutation inference (n = 5000) using the 'randomize' algorithm implemented in  
50  
51 FSL (91).  
52  
53  
54  
55  
56  
57  
58  
59  
60

## Statistical power

The above sample size for participants undergoing fMRI assessments is determined based on our previous fMRI studies. In particular, inclusion of about 17-22 participants per treatment/diagnostic group (matched for age and gender) had a power of >0.8 to detect differences between groups in neural and cognitive response to emotional faces (e.g. (92;93) and Miskowiak et al, under review) at an alpha-level of  $p < 0.05$  for cross-sectional designs. For longitudinal designs, we were able to demonstrate differences between groups in *the change* in task-related neural activity and in hippocampal structure with a sample of about 40 participants per group (94-96). Given this, our inclusion of 60 participants per group is expected to ensure adequate statistical power for both the cross-sectional and longitudinal parts of the fMRI study.

## **BIO-4: at risk or prodromal phase for bipolar disorder**

### Aims

To test whether 1) the composite blood-based biomarker, 2) the composite electronic smartphone-based biomarker and 3) the neurocognitive signature for bipolar disorder predict onset of illness (depression or mania) among a healthy (i.e., non-syndromal level) high risk population of first degree siblings and offspring to the patients with newly diagnosed/first episode mania/bipolar disorder, included in BIO-1, BIO-2 and BIO-3.

Background and theoretical basis: First-generation relatives to patients with bipolar disorder have a nine-fold increased risk of developing bipolar disorder and a two to three-fold increased risk of developing unipolar disorder (1). Although there is a great need for early detection and primary prevention of onset of illness among relatives to patients with bipolar disorder recent prior attempts have not been successful due to retrospective designs, poor characterisation of high risk individuals

1  
2  
3  
4 and small sample sizes (97). This is the first time a composite blood-based, a composite  
5  
6 smartphone-based and a composite neurocognitive biomarker identified among patients with bipolar  
7  
8 disorder will be investigated among their healthy relatives as a predictor measure of onset of illness  
9  
10 (18). This approach increases the chances of obtaining a high specificity and sensitivity of the  
11  
12 composite biomarkers.  
13

### 14 15 16 17 Methods

18  
19 This BIO-4 includes first-generation relatives (siblings and offspring aged 15 to 40 years) to the  
20  
21 recruited patients with first manic or bipolar diagnosis. All recruited patients will be asked about the  
22  
23 lifetime psychiatric history of first-degree relatives (their biological parents, siblings and offspring)  
24  
25 based on the Brief Screening for Family Psychiatric History questionnaire described by Weissmann  
26  
27 and colleagues (98). We expect that at least 200 first-generation relatives will be asymptomatic or  
28  
29 present mild symptoms or prodromal patterns to affective disorders and will be included in the study.  
30  
31 Biological tissues will be drawn (as part of BIO-1) and neurocognitive function will be assessed on  
32  
33 all individuals and brain imaging will be done on 60 individuals with longitudinal assessments.  
34  
35

### 36 37 Statistical analyses

38  
39 BIO4 will use a combination of penalized regression techniques, and random forests to infer the  
40  
41 importance of the original and combined markers and to compare the similarity of prediction error  
42  
43 from the models with and without combining the markers.  
44  
45  
46  
47  
48  
49  
50  
51

### 52 Feasibility

53  
54 The BIO study is fully feasible as patients are recruited as part of daily health care for patients  
55  
56 referred to the Copenhagen Affective Disorder Clinic.  
57  
58  
59  
60



## Ethical considerations

The BIO study has been approved by the Local Ethical Committee (H-7-2014-007) and the data agency, Capital Region of Copenhagen (RHP-2015-023). According to these specifications, adolescents aged 15-18 years will be invited only if parents have given consent. Data will be saved, encrypted and assessed according to the regulations from the Capital Region of Denmark. The study complies with the Declaration of Helsinki principles (Seoul, October 2008).

## Dissemination

Study results will be presented in peer reviewed journals and at international conferences in accordance with relevant reporting guidelines (99;100).

## Discussion

### Summary

It is expected that the BIO cohort will provide valid biological, electronic, neurocognitive and neuroimaging data and for the first time longitudinally identify changes in biomarkers during different stages of bipolar illness, i.e., at risk stage, following onset, during first relapse and recurrent relapses and in the late stages of the illness as according to Berk et al (15).

### Limitations

Some limitations of the BIO study should be noted beforehand. First, the rather extensive initial assessment study procedure may potentially result in selection of participants that are intrinsically

1  
2  
3  
4 positive towards clinical research and readily willing to cooperate. Nevertheless, we expect that  
5  
6 such selection will be decreased as it is likely that the vast majority of the more than 100 newly  
7  
8 diagnosed/first episode bipolar patients referred to the Copenhagen Affective Disorder Clinic each  
9  
10 year will accept participation in the BIO study as this implies an extensive clinical evaluation.  
11  
12 Second, attrition may increase during long-term follow-up and patients who stay in the study may  
13  
14 adhere more to treatment in general. Such selection is inherent in clinical longitudinal research, and  
15  
16 the large number of participants that will be included will increase external validity. Third, potential  
17  
18 confounding effects of psychotropic medication may influence comparisons between patients with  
19  
20 bipolar disorder and healthy control individuals as well as comparisons within patients as the vast  
21  
22 majority of patients will get medication that may change during the course of illness. Lithium,  
23  
24 mood stabilizers and antipsychotics may have effects on the collected biological, smartphone-based,  
25  
26 neuropsychological and brain imaging data. Effects of medication on biological measures are not  
27  
28 clear (101) although analyses from systematic reviews and meta-analyses involving only bipolar  
29  
30 disorder patients have not found clear effects of medication on cytokines (34;35), BDNF (37), gene  
31  
32 expression (36) nor has subsequent individual studies on cytokines (44;102), BDNF (39;102), gene  
33  
34 expression (46) or DNA and RNA damage (40;41). Effects of medication on electronic smartphone  
35  
36 generated data as well as on neuropsychological and brain imaging data are poorly investigated and  
37  
38 warrants further studies (103).  
39  
40  
41  
42  
43  
44  
45

46 Fourth, due to the large number of biological and statistical tests included in the BIO study, chance  
47  
48 findings may occur in relation to the individual biological test. However, the aim of the BIO study  
49  
50 is to identify a composite biomarker measure related to bipolar illness, depression and mania using  
51  
52 cross validation or alternatively split sample designs in the development and validation of the  
53  
54 composite biomarker.  
55  
56  
57  
58  
59  
60

1  
2  
3  
4  
5  
6  
7  
8  
9 Finally, the BIO study does not include (randomised) interventions limiting causal interpretations of  
10 the results. Nevertheless, with the BIO prospective, repeated measures design it is possible to  
11 identify valid associations between the composite measures (of biological, electrical,  
12 neuropsychological and brain imaging data) and depressive and manic symptoms and states.  
13  
14  
15  
16  
17  
18

### 19 Strengths

20  
21 The BIO study is the first study aiming to identify 1) a composite blood-based biomarker, 2) a  
22 composite electronic smartphone-based biomarker and 3) a neurocognitive signature for bipolar  
23 disorder as well as to measure the same biomarkers in newly diagnosed/first episode bipolar  
24 patients and their healthy first-generation relatives. It is possible to recruit newly diagnosed/first  
25 episode patients with mania/bipolar as all such patients from the entire Capital Region of Denmark  
26 are referred to the Copenhagen Affective Disorder Clinic and routinely asked for inclusion in the  
27 BIO study. Long-term attrition is supposed to be low as all patients will be followed by the  
28 Copenhagen Affective Disorder Clinic for the first two years and subsequently in other treatment  
29 settings in the Capital Region of Denmark. Including longitudinal assessment of healthy individuals  
30 is of paramount importance to control for the effect of timing and ageing (104), but among all  
31 studies on biomarkers in bipolar disorder, this has been done only in two studies from our group  
32 (40;44). The study will be performed by an experienced international research group, combining  
33 expertise from all areas of the study.  
34  
35  
36  
37  
38  
39  
40  
41  
42  
43  
44  
45  
46  
47  
48  
49  
50  
51  
52

### 53 Conclusion

54  
55  
56  
57  
58  
59  
60

1  
2  
3  
4 The BIO study is a large long-term cohort study on biomarkers in bipolar disorder and we expect  
5  
6 that the findings for the first time will be representative of biomarkers in bipolar disorder in general  
7  
8 as no prior study on newly diagnosed/first episode bipolar disorder has been conducted. It is  
9  
10 expected that the BIO cohort will provide valid biological, electronically, neuropsychological and  
11  
12 brain imaging longitudinal data.  
13  
14  
15  
16  
17  
18  
19  
20

#### 21 Authors' contribution

22 LVK designed the study together with MV, KM, KWM and MFJ. LVK drafted the study protocol  
23 and the manuscript. All authors contributed to development of the study protocol and to editing the  
24 manuscript and read and approved the final version.

25 KM, LBN, RFS, CE, BKP, HEP, RSM, FK, WFG, and MV contributed specifically to BIO-1 on  
26 peripheral blood-based biomarkers. MFJ, OW, JB, MF and OM contributed specifically to BIO-2  
27 on smartphone-based electronic biomarkers. KWM, GMK and MP contributed specifically to BIO-  
28 3 on neurocognitive and brain imaging signatures. MV contributed specifically to BIO-4 on at risk  
29 or prodromal phase of bipolar disorder (in addition to BIO-1).  
30  
31  
32

#### 33 Funding

34 The study is funded by grants from the Mental Health Services, Capital Region of Denmark, The  
35 Danish Council for Independent Research, Medical Sciences (DFF – 4183-00570), Weimans Fund,  
36 Markedmodningsfonden (the Market Development Fund, (2015-310), Gangstedfonden (A29594),  
37 Helsefonden (16-B-0063), Innovation Fund Denmark (the Innovation Fund, Denmark, 5164-  
38 00001B), Copenhagen Center for Health Technology (CACHET), EU H2020 ITN (EU project  
39 722561), Augustinusfonden (16-0083), Lundbeck foundation (R215-2015-4121).  
40  
41

#### 42 Competing interests

43 LVK has within the preceding three years been a consultant for Lundbeck, AstraZeneca and  
44 Sunovion. KWM has received consultancy fees in the past three years from Lundbeck and Allergan.  
45 MFJ has been a consultant for Eli Lilly and Lundbeck. MV has within the preceding three years  
46 been a consultant for Astra Zeneca and Servier. FK has been a speaker for Ache, Daiichi Sankyo  
47 and Janssen. MP is a consultant for Roche Pharmaceuticals.

48 RSM: Advisory Boards: Lundbeck, Pfizer, AstraZeneca, Elli-Lilly, Janssen, Ortho Purdue, Johnson  
49 & Johnson, Moksha8, Sunovion, Mitsubishi, Takeda, Forest, Otsuka, Bristol-Myers Squibb, Shire,  
50 Speakers Fees: Lundbeck, Pfizer, AstraZeneca, Elli-Lilly, JanssenOrtho, Purdue, Johnson &  
51 Johnson, Moksha8, Sunovion, Mitsubishi, Takeda, Forest, Otsuka, Bristol-Myers Squibb, Shire,  
52 Research Grants: Lundbeck, JanssenOrtho, Shire, Purdue, AstraZeneca, Pfizer, Otsuka, Allergan.  
53 HEP has received a research Grant from Boeringer Ingelheim. GMK has received honoraria as  
54 Field Editor of the International Journal of Neuropsychopharmacology and as scientific advisor for  
55 H Lundbeck A/S. JEB and MF are co-founders and shareholders in Monsenso.  
56  
57  
58  
59  
60

1  
2  
3  
4 LBN, RFS and WFG declare no competing interests.  
5

6 The validity of the research cannot be influenced by any of these potential secondary interest (such  
7 as financial gain or personal relationship).  
8

9  
10 Patient consent  
11 Obtained

12  
13 Ethical approval

14 The study has been approved by the Local Ethical Committee (H-7-2014-007) and the data agency,  
15 Capital Region of Copenhagen (RHP-2015-023).  
16

17  
18 Study registration

19 The BIO study has been registered at clinicaltrials.gov with Trial Registration Number:  
20 NCT02888262.  
21  
22  
23  
24  
25  
26  
27  
28  
29  
30  
31  
32  
33  
34  
35  
36  
37  
38  
39  
40  
41  
42  
43  
44  
45  
46  
47  
48  
49  
50  
51  
52  
53  
54  
55  
56  
57  
58  
59  
60

Table 1. Overview of the longitudinal assessments during risk periods and following onset of bipolar disorder in the four sub-studies of the BIO study.

| Course | Healthy first-gen. relatives | First episode | Remission | First relapse | Remission | Second relapse | Etc. |
|--------|------------------------------|---------------|-----------|---------------|-----------|----------------|------|
| BIO-1  | x                            | x             | x         | x             | x         | x              | x    |
| BIO-2  | x                            | x             | x         | x             | x         | x              | x    |
| BIO-3  | x                            |               | x         |               | x         |                | x    |
| BIO-4  | x                            | x             | x         | x             | x         | x              | x    |

BIO-1: Peripheral blood-based biomarker in bipolar disorder

BIO-2: Smartphone-based electronic biomarker in bipolar disorder

BIO-3: Neurocognitive and brain imaging signatures in bipolar disorder

BIO-4: At risk or prodromal phase for bipolar disorder

## Reference List

1. Lohoff FW, Berettini WH. Genetics of bipolar disorder. In: Yatham LN, Maj M, eds. *Bipolar disorder: Clinical and neurobiological foundations*. Singapore: Wiley-Blackwell 2010:110-23.
2. Kessing LV, Hansen MG, Andersen PK, Angst J. The predictive effect of episodes on the risk of recurrence in depressive and bipolar disorders - a life-long perspective. *Acta Psychiatr Scand* 2004;109:339-44.
3. Kessing LV, Hansen MG, Andersen PK. Course of illness in depressive and bipolar disorders. Naturalistic study, 1994-1999. *Br J Psychiatry* 2004;185:372-7.
4. Post RM, Fleming J, Kapczinski F. Neurobiological correlates of illness progression in the recurrent affective disorders. *J Psychiatr Res* 2012.
5. Schneider MR, DelBello MP, McNamara RK, Strakowski SM, Adler CM. Neuroprogression in bipolar disorder. *Bipolar Disord* 2012;14:356-74.
6. Kessing LV, Nilsson FM. Increased risk of developing dementia in patients with major affective disorders compared to patients with other medical illnesses. *J Affect Disord* 2003;73:261-9.
7. Kessing LV, Andersen PK. Does the risk of developing dementia increase with the number of episodes in patients with depressive disorder and in patients with bipolar disorder? *J Neurol Neurosurg Psychiatry* 2004;75:1662-6.
8. da SJ, Goncalves-Pereira M, Xavier M, Mukaetova-Ladinska EB. Affective disorders and risk of developing dementia: systematic review. *Br J Psychiatry* 2013;202:177-86.
9. Kessing LV, Andersen PK. Evidence for clinical progression of unipolar and bipolar disorders. *Acta Psychiatr.Scand.* 2016 (in press).
10. Kessing LV. Diagnostic stability in bipolar disorder in clinical practise as according to ICD-10. *J Affect Disord* 2005;85:293-9.
11. Baldessarini RJ, Tondo L, Baethge CJ, Lepri B, Bratti IM. Effects of treatment latency on response to maintenance treatment in manic-depressive disorders. *Bipolar Disord* 2007;9:386-93.
12. Phillips ML, Kupfer DJ. Bipolar disorder diagnosis: challenges and future directions. *Lancet* 2013;381:1663-71.
13. Papakostas GI, Shelton RC, Kinrys G et al. Assessment of a multi-assay, serum-based biological diagnostic test for major depressive disorder: a pilot and replication study. *Mol Psychiatry* 2013;18:332-9.
14. Fries GR, Pfaffenseller B, Stertz L et al. Staging and neuroprogression in bipolar disorder. *Curr Psychiatry Rep* 2012;14:667-75.

15. Berk M, Berk L, Dodd S et al. Stage managing bipolar disorder. *Bipolar Disord* 2013.
16. McIntyre RS. Predicting and preventing bipolar disorder: the need to fundamentally advance the strategic approach. *Bipolar Disorder*. 2014 (in press).
17. Grande I, Magalhaes PV, Chendo I et al. Staging bipolar disorder: clinical, biochemical, and functional correlates. *Acta Psychiatr Scand* 2014;129:437-44.
18. Kapczinski F, Magalhaes PV, Balanza-Martinez V et al. Staging systems in bipolar disorder: an International Society for Bipolar Disorders Task Force Report. *Acta Psychiatr Scand* 2014.
19. Kessing LV, Hansen HV, Hvenegaard A et al. Treatment in a specialised out-patient mood disorder clinic v. standard out-patient treatment in the early course of bipolar disorder: randomised clinical trial. *Br J Psychiatry* 2013;202:212-9.
20. First MB, Spitzer M, Gibbon M, Williams JB. Structured Clinical Interview for DSM-IV-TR Axis I Disorders. New York: Biometrics Research Department, New York State Psychiatric Institute, New York., 2002.
21. Wing JK, Babor T, Brugha T et al. SCAN. Schedules for Clinical Assessment in Neuropsychiatry. *Arch Gen Psychiatry* 1990;47:589-93.
22. Hamilton M. A rating scale for depression. *J Neurol Neurosurg Psychiatry* 1960;23:56-62.
23. Young RC, Biggs JT, Ziegler VE, Meyer DA. A rating scale for mania: reliability, validity and sensitivity. *Br J Psychiatry* 1978;133:429-35.
24. Vinberg M, Miskowiak K, Kessing LV. Risk markers for affective disorder, a seven-years follow up study of a twin cohort at low and high risk for affective disorder. *J Psychiatr Res* 2013;47:565-71.
25. Hillegers MH, Reichart CG, Wals M, Verhulst FC, Ormel J, Nolen WA. Five-year prospective outcome of psychopathology in the adolescent offspring of bipolar parents. *Bipolar Disord* 2005;7:344-50.
26. Rosa AR, Sanchez-Moreno J, Martinez-Aran A et al. Validity and reliability of the Functioning Assessment Short Test (FAST) in bipolar disorder. *Clin Pract Epidemiol Ment Health* 2007;3:5.
27. Angst J, Adolfsson R, Benazzi F et al. The HCL-32: towards a self-assessment tool for hypomanic symptoms in outpatients. *J Affect Disord* 2005;88:217-33.
28. Bukh JD, Bock C, Vinberg M, Gether U, Kessing LV. Clinical utility of Standardised Assessment of Personality - Abbreviated Scale (SAPAS) among patients with first episode depression. *J Affect Disord* 2010;127:199-202.
29. Bech P, Olsen LR, Kjoller M, Rasmussen NK. Measuring well-being rather than the absence of distress symptoms: a comparison of the SF-36 Mental Health subscale and the WHO-Five Well-Being Scale. *Int J Methods Psychiatr Res* 2003;12:85-91.



- 1
- 2
- 3
- 4 30. Kessing LV, Hansen HV, Ruggeri M, Bech P. Satisfaction with treatment among patients
- 5 with depressive and bipolar disorders. *Soc Psychiatry Psychiatr Epidemiol* 2006;41:148-55.
- 6
- 7 31. Stalder T, Kirschbaum C. Analysis of cortisol in hair--state of the art and future directions.
- 8 *Brain Behav Immun* 2012;26:1019-29.
- 9
- 10 32. Faurholt-Jepsen M, Brage S, Vinberg M et al. Differences in psychomotor activity in
- 11 patients suffering from unipolar and bipolar affective disorder in the remitted or
- 12 mild/moderate depressive state. *J Affect Disord* 2012;141:457-63.
- 13
- 14 33. Faurholt-Jepsen M, Brage S, Vinberg M, Kessing LV. State-related differences in the level
- 15 of psychomotor activity in patients with bipolar disorder - Continuous heart rate and
- 16 movement monitoring. *Psychiatry Res* 2016;237:166-74.
- 17
- 18 34. Munkholm K, Vinberg M, Kessing LV. Cytokines in bipolar disorder: a systematic review
- 19 and meta-analysis. *J Affect Disord* 2013;144:16-27.
- 20
- 21 35. Munkholm K, Brauner JV, Kessing LV, Vinberg M. Cytokines in bipolar disorder vs.
- 22 healthy control subjects: a systematic review and meta-analysis. *J Psychiatr Res*
- 23 2013;47:1119-33.
- 24
- 25 36. Munkholm K, Vinberg M, Berk M, Kessing LV. State-related alterations of gene expression
- 26 in bipolar disorder: a systematic review. *Bipolar Disord* 2012;14:684-96.
- 27
- 28 37. Munkholm K, Vinberg M, Kessing LV. Peripheral blood brain-derived neurotrophic factor
- 29 in bipolar disorder: a comprehensive systematic review and meta-analysis. *Mol Psychiatry*
- 30 2015.
- 31
- 32 38. Frey BN, Andreazza AC, Houenou J et al. Biomarkers in bipolar disorder: a positional paper
- 33 from the International Society for Bipolar Disorders Biomarkers Task Force. *Aust N Z J*
- 34 *Psychiatry* 2013;47:321-32.
- 35
- 36 39. Munkholm K, Pedersen BK, Kessing LV, Vinberg M. Elevated levels of plasma brain
- 37 derived neurotrophic factor in rapid cycling bipolar disorder patients.
- 38 *Psychoneuroendocrinology* 2014;47:199-211.
- 39
- 40 40. Jacoby AS, Vinberg M, Poulsen HE, Kessing LV, Munkholm K. Increased DNA and RNA
- 41 damage by oxidation in patients with bipolar I disorder. *Transl Psychiatry* 2016;6:e867.
- 42
- 43 41. Munkholm K, Poulsen HE, Kessing LV, Vinberg M. Elevated levels of urinary markers of
- 44 oxidatively generated DNA and RNA damage in bipolar disorder. *Bipolar Disord*
- 45 2015;17:257-68.
- 46
- 47 42. Munkholm K, Peijs L, Kessing LV, Vinberg M. Reduced mRNA expression of PTGDS in
- 48 peripheral blood mononuclear cells of rapid-cycling bipolar disorder patients compared with
- 49 healthy control subjects. *Int J Neuropsychopharmacol* 2015;18.
- 50
- 51 43. Jacoby AS, Munkholm K, Vinberg M et al. Glycogen synthase kinase-3beta in patients with
- 52 bipolar I disorder: results from a prospective study. *Bipolar Disord* 2016;18:334-41.
- 53
- 54
- 55
- 56
- 57
- 58
- 59
- 60

- 1
- 2
- 3
- 4 44. Munkholm K, Weikop P, Kessing LV, Vinberg M. Elevated levels of IL-6 and IL-18 in
- 5 manic and hypomanic states in rapid cycling bipolar disorder patients. *Brain Behav Immun*
- 6 2015;43:205-13.
- 7
- 8 45. Goldstein BI, Young LT. Toward clinically applicable biomarkers in bipolar disorder: focus
- 9 on BDNF, inflammatory markers, and endothelial function. *Curr Psychiatry Rep*
- 10 2013;15:425.
- 11
- 12 46. Munkholm K, Peijs L, Vinberg M, Kessing LV. A composite peripheral blood gene
- 13 expression measure as a potential diagnostic biomarker in bipolar disorder. *Transl*
- 14 *Psychiatry* 2015;5:e614.
- 15
- 16 47. Dickerson F, Schroeder J, Stallings C, Origoni A, Bahn S, Yolken R. Multianalyte markers
- 17 of schizophrenia and bipolar disorder: A preliminary study. *Schizophr Res* 2015;168:450-5.
- 18
- 19 48. Haenisch F, Cooper JD, Reif A et al. Towards a blood-based diagnostic panel for bipolar
- 20 disorder. *Brain Behav Immun* 2016;52:49-57.
- 21
- 22 49. Berk M, Conus P, Lucas N et al. Setting the stage: from prodrome to treatment resistance in
- 23 bipolar disorder. *Bipolar Disord* 2007;9:671-8.
- 24
- 25 50. Brink-Jensen K, Bak S, Jorgensen K, Ekstrom CT. Integrative analysis of metabolomics and
- 26 transcriptomics data: a unified model framework to identify underlying system pathways.
- 27 *PLoS One* 2013;8:e72116.
- 28
- 29 51. Hastie T, Tibshirani R, Friedman J. Penalised regression. *The Elements of Statistical*
- 30 *Learning: Data Mining, Inference, and Prediction, Second Edition.* Springer Verlag., 2009.
- 31
- 32 52. Phelps J, Ghaemi SN. The mistaken claim of bipolar 'overdiagnosis': solving the false
- 33 positives problem for DSM-5/ICD-11. *Acta Psychiatr Scand* 2012;126:395-401.
- 34
- 35 53. Bopp JM, Miklowitz DJ, Goodwin GM, Stevens W, Rendell JM, Geddes JR. The
- 36 longitudinal course of bipolar disorder as revealed through weekly text messaging: a
- 37 feasibility study. *Bipolar Disord* 2010;12:327-34.
- 38
- 39 54. Bardram, J. E., Frost, M., Szántó, K., Faurholt-Jepsen, M., Vinberg, M., and Kessing, L. V.
- 40 Designing Mobile Health Technology for Bipolar Disorder: A Field Trial of the
- 41 MONARCA System. *Proceedings of the SIGCHI Conference on Human Factors in*
- 42 *Computing Systems*, 2627-2636. 2013.
- 43
- 44 55. Faurholt-Jepsen M, Frost M, Ritz C et al. Daily electronic self-monitoring in bipolar
- 45 disorder using smartphones - the MONARCA I trial: a randomized, placebo-controlled,
- 46 single-blind, parallel group trial. *Psychol Med* 2015;1-14.
- 47
- 48 56. Frost, M., Doryab, A., Faurholt-Jepsen, M., Kessing, L. V., and Bardram, J. E. Supporting
- 49 disease insight through data analysis: refinements of the monarca self-assessment system.
- 50 20143. *Proceedings of the 2013 ACM international joint conference on Pervasive and*
- 51 *ubiquitous computing*, ACM Press, New York, NY, USA.
- 52
- 53
- 54
- 55
- 56
- 57
- 58
- 59
- 60

- 1
- 2
- 3
- 4 57. Bardram, J. E., Frost, M., Szántó, K., and Marcu, G. The MONARCA self-assessment
- 5 system: a persuasive personal monitoring system for bipolar patients. In Proceedings of the
- 6 2nd ACM SIGHIT International Health Informatics Symposium (IHI '12). ACM, New
- 7 York, NY, USA, 21-30. DOI=<http://dx.doi.org/10.1145/2110363.2110370>. 2012.
- 8
- 9
- 10
- 11 58. Gravenhorst F, Muaremi A, Bardram J et al. Mobile phones as medical devices in mental
- 12 disorder treatment: an overview. *Journal of Ubiquitous Computing* 2015;19:335-53.
- 13
- 14 59. Faurholt-Jepsen M, Frost M, Vinberg M, Christensen EM, Bardram JE, Kessing LV.
- 15 Smartphone data as objective measures of bipolar disorder symptoms. *Psychiatry Res*
- 16 2014;217:124-7.
- 17
- 18 60. Faurholt-Jepsen M, Vinberg M, Frost M, Christensen EM, Bardram J, Kessing LV.
- 19 Smartphone data as an electronic biomarker of illness activity in bipolar disorder. *Bipolar*
- 20 *Disord* 2015;7:15-28.
- 21
- 22 61. Faurholt-Jepsen M, Busk J, Frost M et al. Voice analysis as an objective state marker in
- 23 bipolar disorder. *Transl Psychiatry* 2016;6:e856.
- 24
- 25 62. Faedda GL, Ohashi K, Hernandez M et al. Actigraph measures discriminate pediatric
- 26 bipolar disorder from attention-deficit/hyperactivity disorder and typically developing
- 27 controls. *J Child Psychol Psychiatry* 2016;57:706-16.
- 28
- 29 63. Indic P, Salvatore P, Maggini C et al. Scaling behavior of human locomotor activity
- 30 amplitude: association with bipolar disorder. *PLoS One* 2011;6:e20650.
- 31
- 32 64. Valenza G, Nardelli M, Lanata A et al. Wearable monitoring for mood recognition in
- 33 bipolar disorder based on history-dependent long-term heart rate variability analysis. *IEEE J*
- 34 *Biomed Health Inform* 2014;18:1625-35.
- 35
- 36 65. Torres IJ, Boudreau VG, Yatham LN. Neuropsychological functioning in euthymic bipolar
- 37 disorder: a meta-analysis. *Acta Psychiatr Scand Suppl* 2007;17-26.
- 38
- 39 66. Bora E, Yucel M, Pantelis C. Cognitive endophenotypes of bipolar disorder: a meta-analysis
- 40 of neuropsychological deficits in euthymic patients and their first-degree relatives. *J Affect*
- 41 *Disord* 2009;113:1-20.
- 42
- 43 67. Mann-Wrobel MC, Carreno JT, Dickinson D. Meta-analysis of neuropsychological
- 44 functioning in euthymic bipolar disorder: an update and investigation of moderator
- 45 variables. *Bipolar Disord* 2011;13:334-42.
- 46
- 47 68. Bourne C, Aydemir O, Balanza-Martinez V et al. Neuropsychological testing of cognitive
- 48 impairment in euthymic bipolar disorder: an individual patient data meta-analysis. *Acta*
- 49 *Psychiatr Scand* 2013;128:149-62.
- 50
- 51 69. Depp CA, Mausbach BT, Harmell AL et al. Meta-analysis of the association between
- 52 cognitive abilities and everyday functioning in bipolar disorder. *Bipolar Disord*
- 53 2012;14:217-26.
- 54
- 55
- 56
- 57
- 58
- 59
- 60

- 1
  - 2
  - 3
  - 4
  - 5
  - 6
  - 7
  - 8
  - 9
  - 10
  - 11
  - 12
  - 13
  - 14
  - 15
  - 16
  - 17
  - 18
  - 19
  - 20
  - 21
  - 22
  - 23
  - 24
  - 25
  - 26
  - 27
  - 28
  - 29
  - 30
  - 31
  - 32
  - 33
  - 34
  - 35
  - 36
  - 37
  - 38
  - 39
  - 40
  - 41
  - 42
  - 43
  - 44
  - 45
  - 46
  - 47
  - 48
  - 49
  - 50
  - 51
  - 52
  - 53
  - 54
  - 55
  - 56
  - 57
  - 58
  - 59
  - 60
70. Rosa AR, Magalhaes PV, Czepielewski L et al. Clinical staging in bipolar disorder: focus on cognition and functioning. *J Clin Psychiatry* 2014;75:e450-e456.
71. Samame C, Martino DJ, Strejilevich SA. Longitudinal course of cognitive deficits in bipolar disorder: a meta-analytic study. *J Affect Disord* 2014;164:130-8.
72. Kessing LV, Olsen EW, Mortensen PB, Andersen PK. Dementia in affective disorder: a case-register study. *Acta Psychiatr Scand* 1999;100:176-85.
73. Wu KY, Chang CM, Liang HY et al. Increased risk of developing dementia in patients with bipolar disorder: a nested matched case-control study. *Bipolar Disord* 2013;15:787-94.
74. Chen MH, Li CT, Tsai CF et al. Risk of subsequent dementia among patients with bipolar disorder or major depression: a nationwide longitudinal study in Taiwan. *J Am Med Dir Assoc* 2015;16:504-8.
75. Strakowski SM, Adler CM, Holland SK, Mills N, DelBello MP. A preliminary fMRI study of sustained attention in euthymic, unmedicated bipolar disorder. *Neuropsychopharmacology* 2004;29:1734-40.
76. Kerr N, Dunbar RI, Bentall RP. Theory of mind deficits in bipolar affective disorder. *J Affect Disord* 2003;73:253-9.
77. Wessa M, Linke J. Emotional processing in bipolar disorder: behavioural and neuroimaging findings. *Int Rev Psychiatry* 2009;21:357-67.
78. Phillips ML, Swartz HA. A Critical Appraisal of Neuroimaging Studies of Bipolar Disorder: Toward a New Conceptualization of Underlying Neural Circuitry and a Road Map for Future Research. *Am J Psychiatry* 2014.
79. Hallahan B, Newell J, Soares JC et al. Structural magnetic resonance imaging in bipolar disorder: an international collaborative mega-analysis of individual adult patient data. *Biol Psychiatry* 2011;69:326-35.
80. Mora E, Portella MJ, Forcada I, Vieta E, Mur M. Persistence of cognitive impairment and its negative impact on psychosocial functioning in lithium-treated, euthymic bipolar patients: a 6-year follow-up study. *Psychol Med* 2013;43:1187-96.
81. Bauer IE, Pascoe MC, Wollenhaupt-Aguiar B, Kapczynski F, Soares JC. Inflammatory mediators of cognitive impairment in bipolar disorder. *J Psychiatr Res* 2014.
82. Lim CS, Baldessarini RJ, Vieta E, Yucel M, Bora E, Sim K. Longitudinal neuroimaging and neuropsychological changes in bipolar disorder patients: review of the evidence. *Neurosci Biobehav Rev* 2013;37:418-35.
83. Balanza-Martinez V, Rubio C, Selva-Vera G et al. Neurocognitive endophenotypes (endophenocognotypes) from studies of relatives of bipolar disorder subjects: a systematic review. *Neurosci Biobehav Rev* 2008;32:1426-38.

- 1
- 2
- 3
- 4 84. Raust A, Daban C, Cochet B, Henry C, Bellivier F, Scott J. Neurocognitive performance as
- 5 an endophenotype for bipolar disorder. *Front Biosci (Elite Ed)* 2014;6:89-103.
- 6
- 7 85. Rey A. Psychological examination of traumatic encephalopathy. *Archives de*
- 8 *Psychologic* 1941;28:286-340.
- 9
- 10 86. Rey A. *L'examen clinique en psychologie [Clinical tests in psychology]*. Paris.:  
11 Presses Universitaires de France., 1964.
- 12
- 13 87. Kjaerstad HL, Vinberg M, Goldin PR et al. Impaired down-regulation of negative emotion  
14 in self-referent social situations in bipolar disorder: A pilot study of a novel experimental  
15 paradigm. *Psychiatry Res* 2016;238:318-25.
- 16
- 17 88. Chase HW, Nusslock R, Almeida JR, Forbes EE, LaBarbara EJ, Phillips ML. Dissociable  
18 patterns of abnormal frontal cortical activation during anticipation of an uncertain reward or  
19 loss in bipolar versus major depression. *Bipolar Disord* 2013;15:839-54.
- 20
- 21 89. Miskowiak K, O'Sullivan U, Harmer CJ. Erythropoietin enhances hippocampal response  
22 during memory retrieval in humans. *J Neurosci* 2007;27:2788-92.
- 23
- 24 90. Garnefski N, Kraaij V, SP. Negative life events, cognitive emotion regulation and  
25 emotional problems. *Pers Individ Differ* 2001;30:1311-27.
- 26
- 27 91. Winkler AM, Ridgway GR, Webster MA, Smith SM, Nichols TE. Permutation inference for  
28 the general linear model. *Neuroimage* 2014;92:381-97.
- 29
- 30 92. Miskowiak K, O'Sullivan U, Harmer CJ. Erythropoietin reduces neural and cognitive  
31 processing of fear in human models of antidepressant drug action. *Biol Psychiatry*  
32 2007;62:1244-50.
- 33
- 34 93. Miskowiak K, Glerup L, Vestbo C et al. Different neural and cognitive response to  
35 emotional faces in healthy monozygotic twins at risk of depression. *Psychological Medicine*  
36 2015;45:1447-58.
- 37
- 38 94. Miskowiak KW, Vinberg M, Macoveanu J et al. Effects of Erythropoietin on Hippocampal  
39 Volume and Memory in Mood Disorders. *Biol Psychiatry* 2015;78:270-7.
- 40
- 41 95. Miskowiak KW, Macoveanu J, Vinberg M et al. Effects of erythropoietin on memory-  
42 relevant neurocircuitry activity and recall in mood disorders. *Acta Psychiatr Scand*  
43 2016;134:249-59.
- 44
- 45 96. Miskowiak KW, Vinberg M, Glerup L et al. Neural correlates of improved executive  
46 function following erythropoietin treatment in mood disorders. *Psychol Med* 2016;46:1679-  
47 91.
- 48
- 49 97. Brietzke E, Mansur RB, Soczynska JK, Kapczynski F, Bressan RA, McIntyre RS. Towards a  
50 multifactorial approach for prediction of bipolar disorder in at risk populations. *J Affect*  
51 *Disord* 2012;140:82-91.
- 52
- 53
- 54
- 55
- 56
- 57
- 58
- 59
- 60

- 1  
2  
3  
4 98. Weissman MM, Wickramaratne P, Adams P, Wolk S, Verdelli H, Olfson M. Brief screening  
5 for family psychiatric history: the family history screen. *Arch Gen Psychiatry* 2000;57:675-  
6 82.  
7  
8 99. Gallo V, Egger M, McCormack V et al. STrengthening the Reporting of OBservational  
9 studies in Epidemiology - Molecular Epidemiology (STROBE-ME): an extension of the  
10 STROBE statement. *Eur J Clin Invest* 2012;42:1-16.  
11  
12 100. von EE, Altman DG, Egger M, Pocock SJ, Gotzsche PC, Vandenbroucke JP. The  
13 Strengthening the Reporting of Observational Studies in Epidemiology (STROBE)  
14 Statement: guidelines for reporting observational studies. *Int J Surg* 2014;12:1495-9.  
15  
16 101. van den Ameele S, van DL, Staels W et al. The effect of mood-stabilizing drugs on cytokine  
17 levels in bipolar disorder: A systematic review. *J Affect Disord* 2016;203:364-73.  
18  
19 102. Jacoby AS, Munkholm K, Vinberg M, Pedersen BK, Kessing LV. Cytokines, brain-derived  
20 neurotrophic factor and C-reactive protein in bipolar I disorder - Results from a prospective  
21 study. *J Affect Disord* 2016;197:167-74.  
22  
23 103. Laidi C, Houenou J. Brain functional effects of psychopharmacological treatments in bipolar  
24 disorder. *Eur Neuropsychopharmacol* 2016.  
25  
26 104. Munkholm K, Lenskjold T, Jacoby AS et al. Glycogen Synthase Kinase-3beta: Variation  
27 over Time and the Possible Association with Mood and Cognition in Healthy Individuals.  
28 *Neuropsychobiology* 2016;73:108-15.  
29  
30  
31  
32  
33  
34  
35  
36  
37  
38  
39  
40  
41  
42  
43  
44  
45  
46  
47  
48  
49  
50  
51  
52  
53  
54  
55  
56  
57  
58  
59  
60
